# Supplementary material for: Harmicens, Novel Harmine and Ferrocene Hybrids: Design, Synthesis and Biological Activity
Source: MDPI journal article supplement (doi:10.3390/ijms23169315), 2022-08-18
Supplement: s1 [file s1]

Table S1. IR,  $^1\text{H}$  and  $^{13}\text{C}$  NMR spectroscopic data for alkynes **2** and **9**

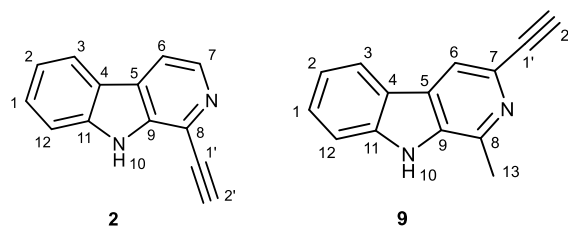

| Compd.   | IR (ATR, $\nu\text{cm}^{-1}$ )                                                                                                                   | $^1\text{H}$ NMR (DMSO- $d_6$ , $\delta$ ppm)                                                                                                                                                                | $^{13}\text{C}$ NMR (DMSO- $d_6$ , $\delta$ ppm)                                                                                                                         |
|----------|--------------------------------------------------------------------------------------------------------------------------------------------------|--------------------------------------------------------------------------------------------------------------------------------------------------------------------------------------------------------------|--------------------------------------------------------------------------------------------------------------------------------------------------------------------------|
| <b>2</b> | 3289, 3154, 3061, 2111, 1626, 1562, 1498, 1452, 1424, 1387, 1321, 1273, 1246, 1151, 1081, 1066, 939, 874, 856, 837, 783, 748, 684, 631, 569, 513 | 11.79 (s, 1H, 10), 8.34 (d, 1H, 7, $J = 5.2$ Hz), 8.26 (d, 1H, 3, $J = 7.9$ Hz), 8.17 (d, 1H, 6, $J = 5.2$ Hz), 7.64 (d, 1H, 12, $J = 8.2$ Hz), 7.60–7.56 (m, 1H, 1), 7.30–7.26 (m, 1H, 2), 4.77 (s, 1H, 2') | 140.83 (8), 138.66 (7), 137.67 (11), 128.67 (1), 128.14 (9), 125.42 (5), 122.02 (3), 120.69 (4), 119.81 (2), 115.32 (6), 112.33 (12), 84.94 (1'), 30.68 (2')             |
| <b>9</b> | 3306, 3143, 2104, 1622, 1597, 1563, 1499, 1446, 1375, 1338, 1315, 1281, 1247, 1178, 1147, 1014, 961, 899, 877, 776, 740, 654, 625, 587, 504, 457 | 11.83 (s, 1H, 10), 8.25–8.22 (m, 1H, 3), 8.21 (s, 1H, 6), 7.62–7.59 (m, 1H, 12), 7.57–7.53 (m, 1H, 1), 7.27–7.23 (m, 1H, 2), 4.03 (s, 1H, 2'), 2.74 (s, 3H, 13)                                              | 142.83 (7), 140.70 (8), 134.06 (11), 129.54 (9), 128.30 (1), 127.01 (5), 122.05 (3), 120.72 (4), 119.78 (2), 117.22 (6), 112.15 (12), 84.85 (1'), 76.72 (2'), 20.33 (13) |

Table S2.  $^1\text{H}$  and  $^{13}\text{C}$  NMR spectroscopic data for azide **15**

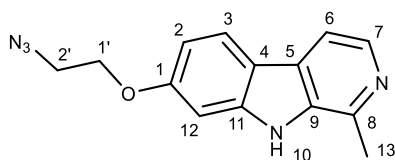

**15**

| Compd.    | $^1\text{H}$ NMR (DMSO- $d_6$ , $\delta$ ppm)                                                                                                                                                                                                                         | $^{13}\text{C}$ NMR (DMSO- $d_6$ , $\delta$ ppm)                                                                                                                        |
|-----------|-----------------------------------------------------------------------------------------------------------------------------------------------------------------------------------------------------------------------------------------------------------------------|-------------------------------------------------------------------------------------------------------------------------------------------------------------------------|
| <b>15</b> | 11.44 (s, 1H, 10), 8.16 (d, 1H, 7, $J = 5.3$ Hz), 8.08 (d, 1H, 3, $J = 5.2$ Hz), 7.82 (d, 1H, 6, $J = 5.2$ Hz), 7.04 (d, 1H, 12, $J = 2.2$ Hz), 6.87 (dd, 1H, 2, $J = 8.6, 2.2$ Hz), 4.30 (t, 2H, 1', $J = 4.8$ Hz), 3.72 (t, 2H, 2', $J = 4.8$ Hz), 2.73 (s, 3H, 13) | 158.70 (1), 141.77 (8), 141.35 (11), 137.78 (7), 134.60 (9), 127.12 (5), 122.75 (3), 115.26 (4), 111.99 (6), 109.14 (2), 95.62 (12), 67.14 (1'), 49.64 (2'), 20.33 (13) |

Table S3.  $^1\text{H}$  and  $^{13}\text{C}$  NMR spectroscopic data for ferrocene azide **19**

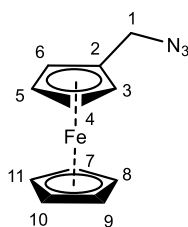

**19**

| Compd.    | $^1\text{H}$ NMR (DMSO- $d_6$ , $\delta$ ppm)                                                           | $^{13}\text{C}$ NMR (DMSO- $d_6$ , $\delta$ ppm)               |
|-----------|---------------------------------------------------------------------------------------------------------|----------------------------------------------------------------|
| <b>19</b> | 4.29 (t, 2H, 3, 6, $J = 1.8$ Hz), 4.21 (t, 2H, 4, 5, $J = 1.9$ Hz), 4.20 (s, 2H, 1), 4.20 (s, 5H, 7–11) | 81.78 (2), 68.62 (3, 6), 68.58 (7–11), 68.44 (4, 5), 50.02 (1) |

Table S4. Analytical and MS data for harmicenes **20–24**

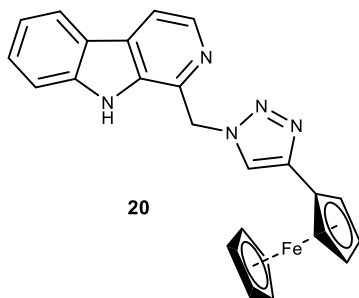

**20**

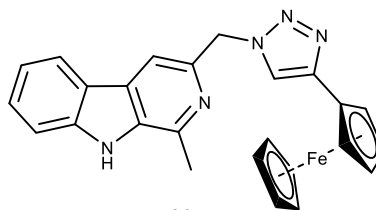

**21**

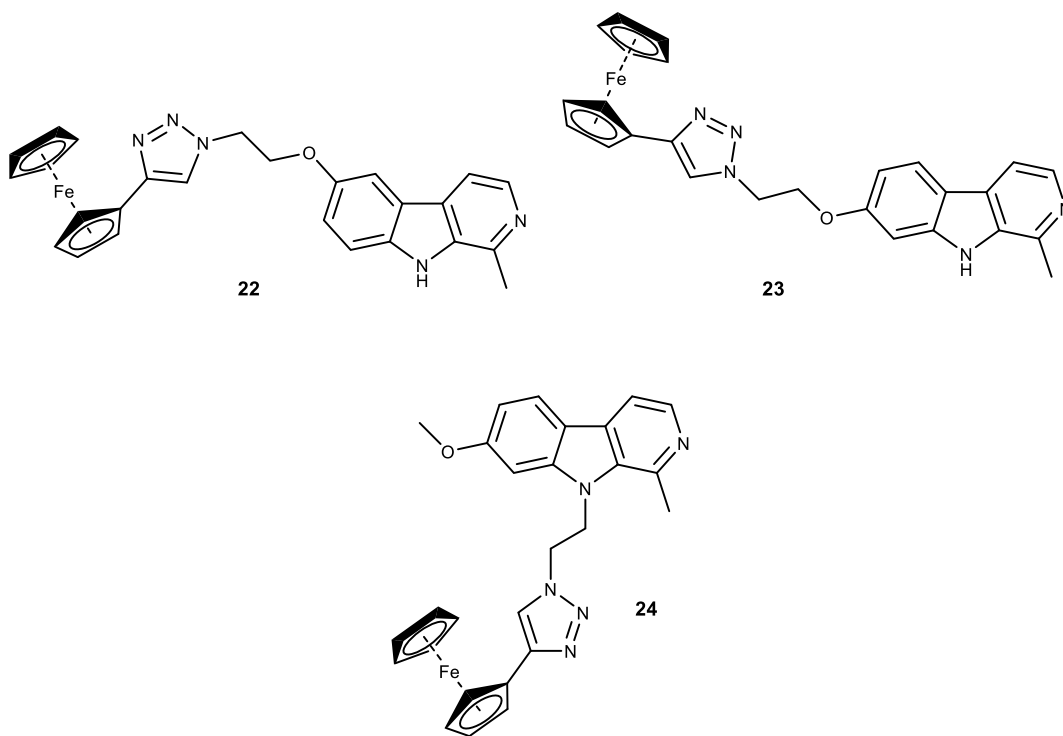

| Compd. | Yield (%) | <i>t<sub>f</sub></i> (°C) | Molecular formula                                  | <i>M<sub>r</sub></i> | MS ( <i>m/z</i> )        | CHN                         |
|--------|-----------|---------------------------|----------------------------------------------------|----------------------|--------------------------|-----------------------------|
| 20     | 78        | 252–255.5                 | C <sub>24</sub> H <sub>19</sub> FeN <sub>5</sub>   | 433.30               | 434.9 (M+1) <sup>+</sup> | C, 66.53; H, 4.42; N, 16.16 |
| 21     | 62        | 242.5–244                 | C <sub>25</sub> H <sub>21</sub> FeN <sub>5</sub>   | 447.32               | 448.9 (M+1) <sup>+</sup> | C, 67.13; H, 4.73; N, 15.66 |
| 22     | 37        | 201.5–204                 | C <sub>26</sub> H <sub>23</sub> FeN <sub>5</sub> O | 477.35               | 477.9 (M+1) <sup>+</sup> | C, 65.42; H, 4.86; N, 14.67 |
| 23     | 77        | 228–229.5                 | C <sub>26</sub> H <sub>23</sub> FeN <sub>5</sub> O | 477.35               | 477.9 (M+1) <sup>+</sup> | C, 65.42; H, 4.86; N, 14.67 |
| 24     | 63        | 218–220                   | C <sub>27</sub> H <sub>25</sub> FeN <sub>5</sub> O | 491.38               | 491.9 (M+1) <sup>+</sup> | C, 66.00; H, 5.13; N, 14.25 |

Table S5. IR, <sup>1</sup>H and <sup>13</sup>C NMR spectroscopic data for harmicenes **20–24**

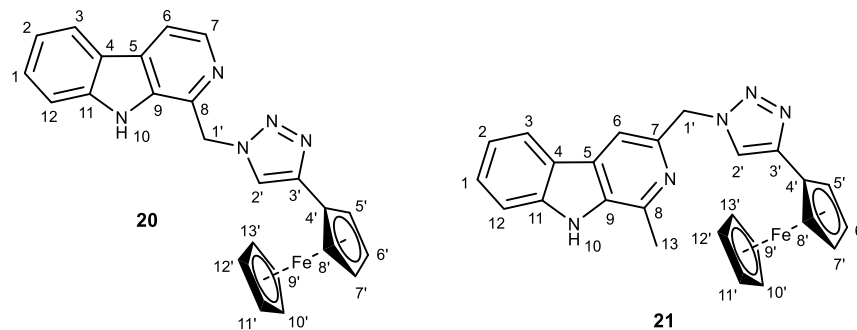

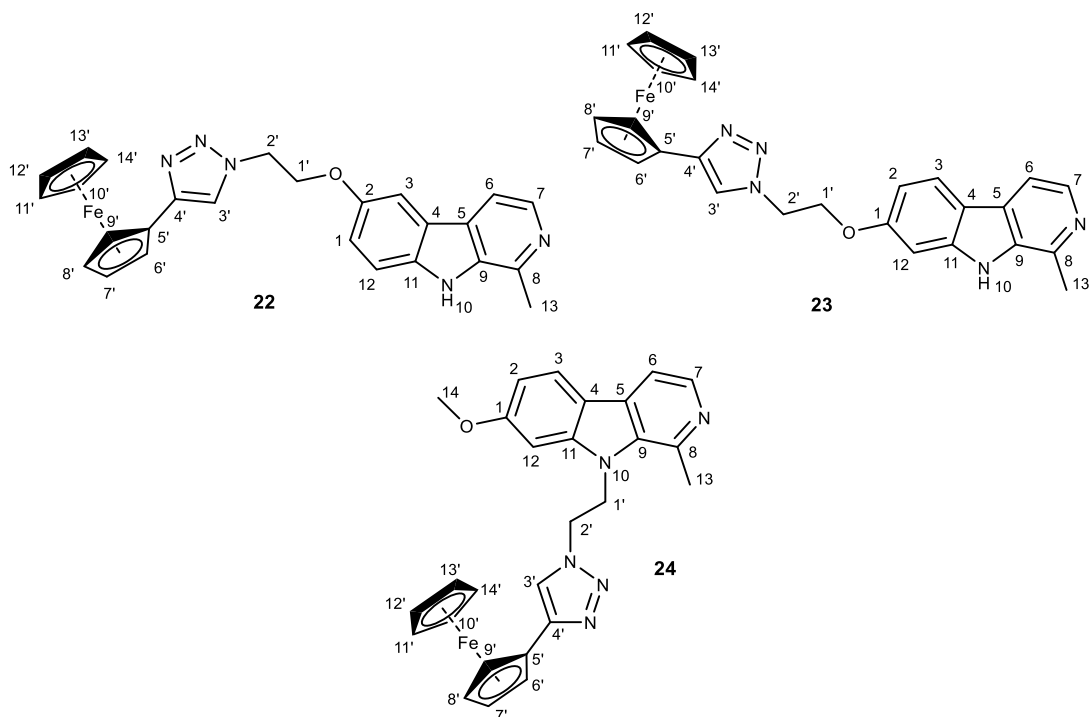

| Compd. | IR (ATR, $\nu/\text{cm}^{-1}$ )                                                                                                                         | $^1\text{H}$ NMR (DMSO- $d_6$ , $\delta$ ppm)                                                                                                                                                                                                                                                          | $^{13}\text{C}$ NMR (DMSO- $d_6$ , $\delta$ ppm)                                                                                                                                                                                                                |
|--------|---------------------------------------------------------------------------------------------------------------------------------------------------------|--------------------------------------------------------------------------------------------------------------------------------------------------------------------------------------------------------------------------------------------------------------------------------------------------------|-----------------------------------------------------------------------------------------------------------------------------------------------------------------------------------------------------------------------------------------------------------------|
| 20     | 3249, 3138, 3094, 2987, 2953, 1625, 1585, 1567, 1497, 1455, 1430, 1389, 1321, 1236, 1212, 1189, 1094, 1058, 998, 875, 816, 794, 750, 730, 622, 592, 500 | 11.95 (s, 1H, 10), 8.31 (d, 1H, 7, $J = 5.2$ Hz), 8.28–8.26 (m, 2H, 3, 2'), 8.13 (d, 1H, 6, $J = 5.1$ Hz), 7.70–7.68 (m, 1H, 12), 7.61–7.59 (m, 1H, 1), 7.30–7.27 (m, 1H, 2), 6.08 (s, 2H, 1'), 4.73 (t, 2H, 5', 8', $J = 1.9$ Hz), 4.28 (t, 2H, 6', 7', $J = 1.8$ Hz), 4.03 (s, 5H, 9'–13')           | 145.22 (8), 140.71 (11), 138.17 (3'), 137.86 (7), 133.85 (9), 128.71 (5), 128.54 (2'), 121.91 (3), 121.57 (1), 120.76 (4), 119.64 (2), 114.82 (6), 112.09 (12), 76.04 (4'), 69.23 (9'–13'), 68.21 (5', 8'), 66.34 (6', 7'), 51.24 (1')                          |
| 21     | 3148, 3101, 2993, 2891, 1737, 1627, 1566, 1506, 1456, 1443, 1351, 1328, 1251, 1219, 1086, 1057, 1019, 1000, 874, 815, 729, 680, 587, 506, 487           | 11.66 (s, 1H, 10), 8.23 (s, 1H, 6), 8.16 (d, 1H, 3, $J = 7.9$ Hz), 7.90 (s, 1H, 2'), 7.60–7.59 (m, 1H, 12), 7.55–7.52 (m, 1H, 1), 7.24–7.21 (m, 1H, 2), 5.76 (s, 2H, 1'), 4.74 (t, 2H, 5', 8', $J = 1.9$ Hz), 4.29 (t, 2H, 6', 7', $J = 1.9$ Hz), 4.03 (s, 5H, 9'–13'), 2.76 (s, 3H, 13)               | 145.37 (8), 142.95 (7), 142.05 (11), 140.77 (3'), 133.94 (9), 128.08 (2'), 127.63 (5), 121.64 (3), 121.06 (1), 120.91 (4), 119.44 (2), 112.09 (6), 111.42 (12), 76.09 (4'), 69.26 (9'–13'), 68.21 (5', 8'), 66.32 (6', 7'), 55.10 (1'), 20.38 (13)              |
| 22     | 3133, 2949, 2872, 1583, 1568, 1497, 1458, 1286, 1210, 1105, 1041, 988, 878, 818, 705, 621, 504                                                          | 11.39 (s, 1H, 10), 8.29 (s, 1H, 3'), 8.15 (d, 1H, 7, $J = 5.3$ Hz), 7.87 (d, 1H, 6, $J = 5.3$ Hz), 7.78 (d, 1H, 12, $J = 2.5$ Hz), 7.48 (d, 1H, 12, $J = 8.8$ Hz), 7.16 (dd, 1H, 1, $J = 8.8, 2.5$ Hz), 4.82 (t, 2H, 1', $J = 5.1$ Hz), 4.73 (t, 2H, 6', 9', $J = 1.9$ Hz), 4.53 (t, 2H, 2', $J = 5.2$ | 151.85 (2), 145.24 (8), 142.24 (4'), 136.98 (7), 135.52 (11), 135.10 (9), 126.63 (4), 121.35 (5), 121.28 (3'), 118.14 (1), 112.77 (6), 112.64 (12), 105.13 (3), 76.05 (5'), 69.22 (10'–14'), 68.21 (6', 9'), 67.14 (1'), 66.34 (7', 8'), 49.24 (2'), 20.40 (13) |

|           |                                                                                                                                                                      |                                                                                                                                                                                                                                                                                                                                                                                        |                                                                                                                                                                                                                                                                            |
|-----------|----------------------------------------------------------------------------------------------------------------------------------------------------------------------|----------------------------------------------------------------------------------------------------------------------------------------------------------------------------------------------------------------------------------------------------------------------------------------------------------------------------------------------------------------------------------------|----------------------------------------------------------------------------------------------------------------------------------------------------------------------------------------------------------------------------------------------------------------------------|
|           |                                                                                                                                                                      |                                                                                                                                                                                                                                                                                                                                                                                        | Hz), 4.30 (t, 2H, 7', 8', $J = 1.8$ Hz), 4.01 (s, 5H, 10'–14'), 2.72 (s, 3H, 13)                                                                                                                                                                                           |
| <b>23</b> | 3125, 3077, 2959, 2850, 2772, 1623, 1566, 1443, 1426, 1301, 1278, 1240, 1185, 1108, 1053, 1042, 977, 874, 822, 810, 743, 720, 693, 638, 587, 570, 522, 513, 495, 483 | 11.44 (s, 1H, 10), 8.30 (s, 1H, 3'), 8.14 (d, 1H, 7, $J = 5.3$ Hz), 8.05 (d, 1H, 3, $J = 8.6$ Hz), 7.79 (d, 1H, 6, $J = 5.3$ Hz), 7.03 (d, 1H, 12, $J = 2.2$ Hz), 6.85 (dd, 1H, 2, $J = 8.6, 2.2$ Hz), 4.83 (t, 2H, 1', $J = 5.1$ Hz), 4.73 (t, 2H, 6', 9', $J = 1.9$ Hz), 4.55 (t, 2H, 2', $J = 5.1$ Hz), 4.30 (t, 2H, 7', 8', $J = 1.8$ Hz), 4.01 (s, 5H, 10'–14'), 2.72 (s, 3H, 13) | 158.62 (1), 145.25 (8), 141.72 (4'), 141.35 (11), 137.76 (7), 134.59 (9), 127.07 (5), 122.71 (3'), 121.34 (3), 115.33 (4), 111.98 (6), 109.17 (2), 95.73 (12), 76.01 (5'), 69.23 (10'–14'), 68.22 (6', 9'), 66.57 (1'), 66.35 (7', 8'), 49.09 (2'), 20.36 (13)             |
| <b>24</b> | 2968, 1621, 1565, 1445, 1404, 1339, 1253, 1222, 1158, 1182, 1136, 1096, 1041, 1021, 970, 929, 877, 821, 807, 641, 590, 545, 501, 475                                 | 8.17 (d, 1H, 7, $J = 5.2$ Hz), 8.04 (d, 1H, 3, $J = 8.5$ Hz), 7.88 (d, 1H, 6, $J = 5.2$ Hz), 7.80 (s, 1H, 3'), 6.84–6.78 (m, 2H, 2, 12), 5.08 (t, 2H, 1', $J = 5.6$ Hz), 4.88 (t, 2H, 2', $J = 5.6$ Hz), 4.49 (t, 2H, 6', 9', $J = 1.9$ Hz), 4.22 (t, 2H, 7', 8', $J = 1.9$ Hz), 3.86–3.85 (m, 8H, 14, 10'–14'), 2.90 (s, 3H, 13)                                                      | 160.51 (1), 145.15 (4'), 142.76 (8), 140.67 (11), 138.12 (7), 134.68 (9), 128.73 (5), 122.23 (3'), 121.79 (3), 114.10 (4), 112.26 (6), 109.81 (2), 92.93 (12), 75.78 (5'), 68.09 (10'–14'), 68.06 (6', 9'), 66.26 (7', 8'), 55.37 (14), 49.71 (1'), 44.47 (2'), 23.18 (13) |

Table S6. Analytical and MS data for harmicenes **25–29**

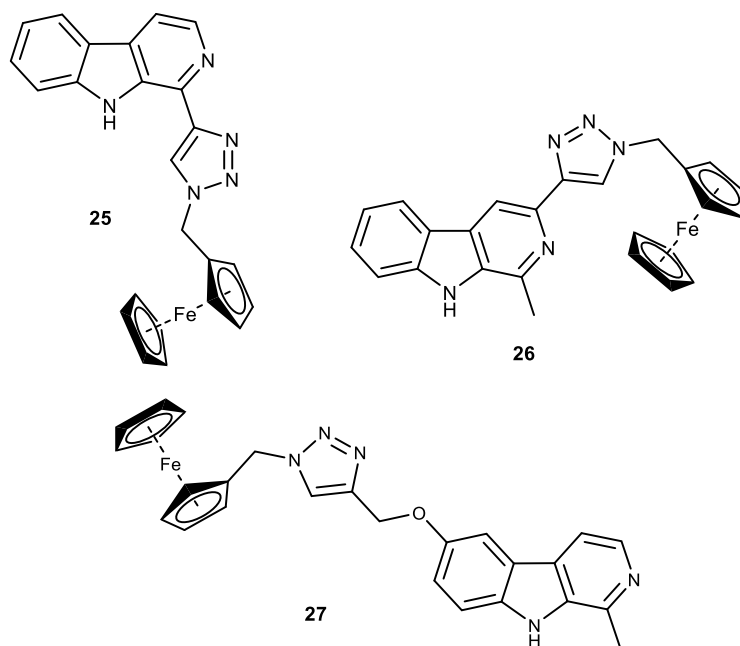

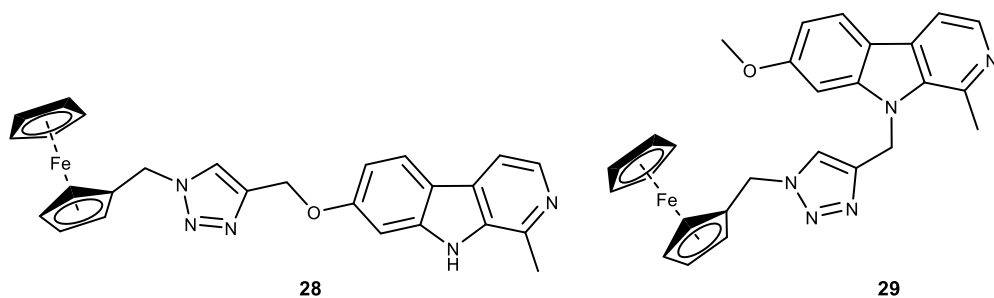

| Compd.    | Yield (%) | <i>t</i> <sub>f</sub> (°C) | Molecular formula                                  | <i>M</i> <sub>r</sub> | MS ( <i>m/z</i> )        | CHN                         |
|-----------|-----------|----------------------------|----------------------------------------------------|-----------------------|--------------------------|-----------------------------|
| <b>25</b> | 51        | 229–230                    | C <sub>24</sub> H <sub>19</sub> FeN <sub>5</sub>   | 433.30                | 434.1 (M+1) <sup>+</sup> | C, 66.53; H, 4.42; N, 16.16 |
| <b>26</b> | 45        | 183–186                    | C <sub>25</sub> H <sub>21</sub> FeN <sub>5</sub>   | 447.32                | 447.9 (M+1) <sup>+</sup> | C, 67.13; H, 4.73; N, 15.66 |
| <b>27</b> | 68        | 244.5–248                  | C <sub>26</sub> H <sub>23</sub> FeN <sub>5</sub> O | 477.35                | 478.1 (M+1) <sup>+</sup> | C, 65.42; H, 4.86; N, 14.67 |
| <b>28</b> | 60        | 242–244                    | C <sub>26</sub> H <sub>23</sub> FeN <sub>5</sub> O | 477.35                | 478.1 (M+1) <sup>+</sup> | C, 65.42; H, 4.86; N, 14.67 |
| <b>29</b> | 30        | 187–190                    | C <sub>27</sub> H <sub>25</sub> FeN <sub>5</sub> O | 491.38                | 492.1 (M+1) <sup>+</sup> | C, 66.00; H, 5.13; N, 14.25 |

Table S7. IR, <sup>1</sup>H and <sup>13</sup>C NMR spectroscopic data for harmicenes **25–29**

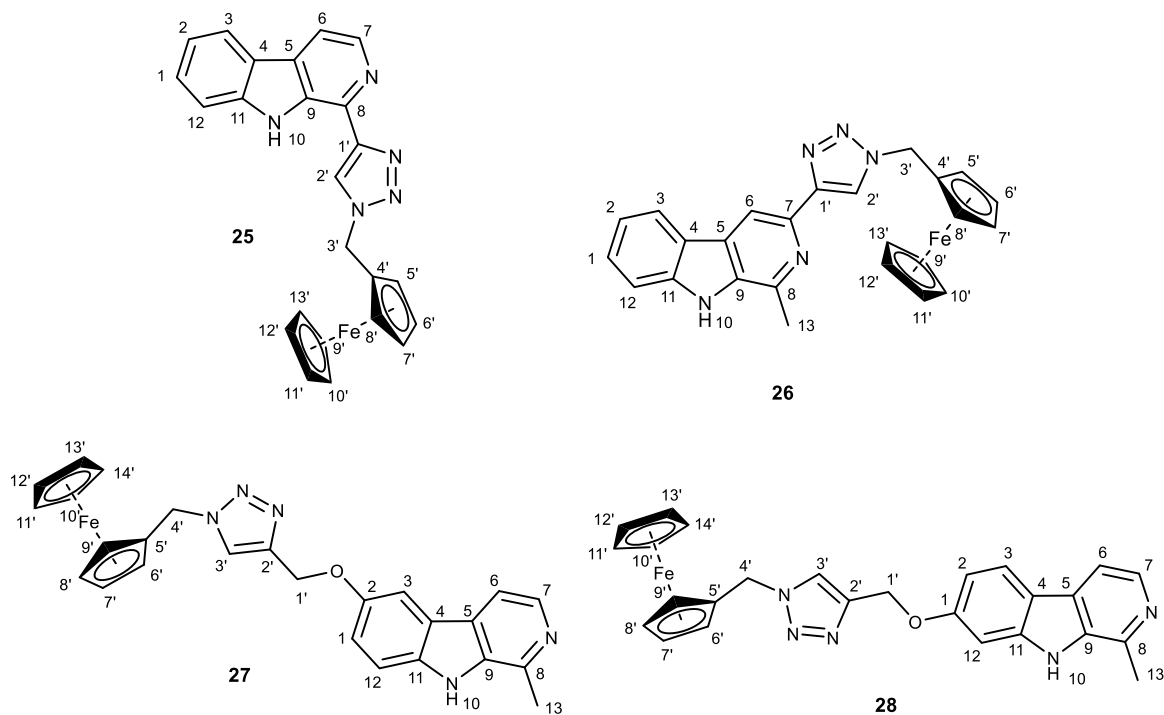

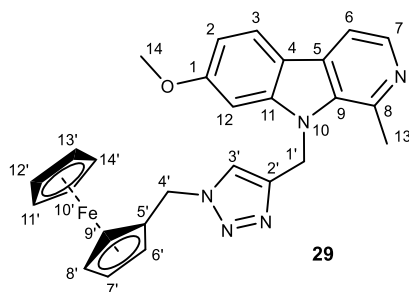

| Compd.    | IR (ATR, $\nu/\text{cm}^{-1}$ )                                                                                                                                          | $^1\text{H}$ NMR (DMSO- $d_6$ , $\delta$ ppm)                                                                                                                                                                                                                                                                                       | $^{13}\text{C}$ NMR (DMSO- $d_6$ , $\delta$ ppm)                                                                                                                                                                                                                |
|-----------|--------------------------------------------------------------------------------------------------------------------------------------------------------------------------|-------------------------------------------------------------------------------------------------------------------------------------------------------------------------------------------------------------------------------------------------------------------------------------------------------------------------------------|-----------------------------------------------------------------------------------------------------------------------------------------------------------------------------------------------------------------------------------------------------------------|
| <b>25</b> | 3385, 3172, 3105, 3065, 2991, 1625, 1576, 1489, 1452, 1437, 1419, 1351, 1314, 1282, 1254, 1239, 1152, 1103, 1000, 829, 807, 749, 629, 591, 548, 499, 479                 | 11.53 (s, 1H, 10), 8.78 (s, 1H, 2'), 8.38 (d, 1H, 7, $J = 5.2$ Hz), 8.26–8.24 (m, 1H, 3), 8.11 (d, 1H, 6, $J = 5.1$ Hz), 7.91–7.90 (m, 1H, 12), 7.57–7.54 (m, 1H, 1), 7.27–7.25 (m, 1H, 2), 5.49 (s, 2H, 3'), 4.46 (t, 2H, 5', 8', $J = 1.9$ Hz), 4.24 (s, 5H, 9'–13'), 4.22 (t, 2H, 6', 7', $J = 1.9$ Hz)                          | 147.60 (8), 141.15 (11), 137.83 (7), 133.68 (9), 131.74 (1'), 129.05 (4), 128.18 (2'), 122.94 (1), 121.47 (3), 120.40 (5), 119.51 (2), 114.11 (6), 113.23 (12), 82.36 (4'), 68.74 (5', 8'), 68.69 (9'–13'), 68.48 (6', 7'), 49.33 (3')                          |
| <b>26</b> | 3361, 2920, 2851, 1734, 1626, 1574, 1496, 1455, 1431, 1373, 1338, 1303, 1277, 1234, 1172, 1104, 1049, 1024, 1000, 924, 889, 818, 788, 775, 704, 631, 558, 584, 503, 478  | 11.69 (s, 1H, 10), 8.58 (s, 1H, 2'), 8.41 (s, 1H, 6), 8.29 (d, 1H, 3, $J = 7.9$ Hz), 7.60 (d, 1H, 12, $J = 8.1$ Hz), 7.54 (t, 1H, 1, $J = 7.6$ Hz), 7.24 (t, 1H, 2, $J = 7.4$ Hz), 5.39 (s, 2H, 3'), 4.45 (t, 2H, 5', 8', $J = 1.9$ Hz), 4.23 (s, 5H, 9'–13'), 4.21 (t, 2H, 6', 7', $J = 1.9$ Hz), 2.80 (s, 3H, 13)                 | 148.61 (7), 141.93 (11), 140.82 (8), 139.95 (9), 133.96 (1'), 128.02 (2'), 127.73 (4), 121.97 (1), 121.27 (5), 121.25 (3), 119.36 (2), 112.01 (6), 108.31 (12), 82.45 (4'), 68.86 (5', 8'), 68.68 (9'–13'), 68.44 (6', 7'), 49.05 (3'), 20.48 (13)              |
| <b>27</b> | 3631, 3137, 3081, 2950, 1637, 1603, 1583, 1567, 1499, 1480, 1451, 1411, 1283, 1211, 1107, 1069, 1054, 1040, 1027, 849, 821, 765, 620, 504                                | 11.37 (s, 1H, 10), 8.24 (s, 1H, 3'), 8.16 (d, 1H, 7, $J = 5.3$ Hz), 7.89–7.88 (m, 2H, 3, 6), 7.49 (d, 1H, 12, $J = 8.8$ Hz), 7.21 (dd, 1H, 1, $J = 8.9, 2.5$ Hz), 5.32 (s, 2H, 1'), 5.21 (s, 2H, 4'), 4.32 (t, 2H, 6', 9', $J = 1.8$ Hz), 4.16–4.14 (m, 7H, 7', 8', 10'–14'), 2.73 (s, 3H, 13)                                      | 151.88 (2), 142.95 (2'), 142.19 (8), 136.96 (7), 135.42 (11), 135.08 (9), 126.69 (4), 124.09 (3'), 121.34 (5), 118.39 (1), 112.73 (6), 112.67 (12), 105.20 (3), 82.49 (5'), 68.62 (10'–14'), 68.59 (6', 9'), 68.31 (7', 8'), 61.88 (1'), 48.92 (4'), 20.40 (13) |
| <b>28</b> | 3344, 3072, 2869, 2785, 1738, 1626, 1567, 1488, 1444, 1377, 1325, 1305, 1290, 1278, 1177, 1142, 1110, 1058, 1142, 1011, 965, 828, 813, 781, 661, 639, 598, 572, 505, 480 | 11.45 (s, 1H, 10), 8.23 (s, 1H, 3'), 8.15 (d, 1H, 7, $J = 5.2$ Hz), 8.05 (d, 1H, 3, $J = 8.6$ Hz), 7.80 (d, 1H, 6, $J = 5.3$ Hz), 7.16 (d, 1H, 12, $J = 2.2$ Hz), 6.89 (dd, 1H, 2, $J = 8.7, 2.3$ Hz), 5.33 (s, 2H, 1'), 5.25 (s, 2H, 4'), 4.34 (t, 2H, 6', 9', $J = 1.9$ Hz), 4.18–4.16 (m, 7H, 7', 8', 10'–14'), 2.72 (s, 3H, 13) | 158.74 (1), 142.71 (8), 141.76 (2'), 141.33 (11), 137.74 (7), 134.58 (9), 127.13 (5), 124.15 (3'), 122.63 (3), 115.11 (4), 111.95 (6), 109.46 (2), 95.86 (12), 82.41 (5'), 68.66 (6', 9'), 68.64 (10'–14'), 68.36 (7', 8'), 61.45 (1'), 48.98 (4'), 20.32 (13)  |

|    |                                                                                                                                              |                                                                                                                                                                                                                                                                                                                                                           |                                                                                                                                                                                                                                                                |
|----|----------------------------------------------------------------------------------------------------------------------------------------------|-----------------------------------------------------------------------------------------------------------------------------------------------------------------------------------------------------------------------------------------------------------------------------------------------------------------------------------------------------------|----------------------------------------------------------------------------------------------------------------------------------------------------------------------------------------------------------------------------------------------------------------|
| 29 | 3135, 3090, 2929, 1709, 1623, 1564, 1499, 1449, 1408, 1325, 1252, 1227, 1193, 1174, 1106, 1042, 1000, 913, 815, 764, 732, 638, 596, 550, 481 | 8.16 (d, 1H, 7, $J = 5.2$ Hz), 8.07 (d, 1H, 3, $J = 8.5$ Hz), 7.98 (s, 1H, 3'), 7.86 (d, 1H, 6, $J = 5.2$ Hz), 7.32 (d, 1H, 12, $J = 2.2$ Hz), 6.87 (dd, 1H, 2, $J = 8.5, 2.2$ Hz), 5.86 (s, 2H, 1'), 5.21 (s, 2H, 4'), 4.23 (t, 2H, 6', 9', $J = 1.8$ Hz), 4.12 (t, 2H, 7', 8', $J = 1.8$ Hz), 4.06 (s, 5H, 10'-14'), 3.88 (s, 3H, 14), 3.03 (s, 3H, 13) | 160.55 (1), 143.81 (2'), 142.67 (8), 141.13 (11), 138.05 (7), 134.66 (9), 128.54 (5), 122.55 (3'), 122.38 (3), 114.46 (4), 112.26 (6), 109.46 (2), 94.05 (12), 82.59 (5'), 68.54 (10'-14'), 68.44 (6', 9'), 68.21 (7', 8'), 55.62 (14), 48.77 (4'), 23.24 (13) |
|    |                                                                                                                                              |                                                                                                                                                                                                                                                                                                                                                           |                                                                                                                                                                                                                                                                |

Table S8. Analytical and MS data for harmicenes **30–33**

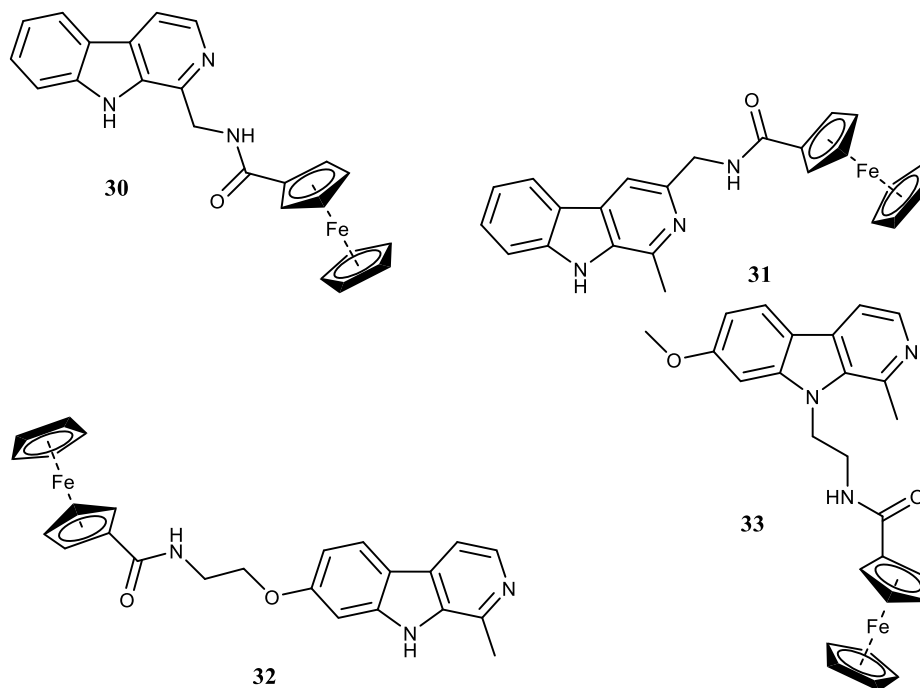

| Compd.    | Yield (%) | $t_f$ (°C) | Molecular formula                                               | $M_r$  | MS ( $m/z$ )             | CHN                         |
|-----------|-----------|------------|-----------------------------------------------------------------|--------|--------------------------|-----------------------------|
| <b>30</b> | 48        | 210–213    | C <sub>23</sub> H <sub>19</sub> FeN <sub>3</sub> O              | 409.27 | 410.0 (M+1) <sup>+</sup> | C, 67.50; H, 4.68; N, 10.27 |
| <b>31</b> | 39        | 240.5–243  | C <sub>24</sub> H <sub>21</sub> FeN <sub>3</sub> O              | 423.30 | 424.0 (M+1) <sup>+</sup> | C, 68.10; H, 5.00; N, 9.93  |
| <b>32</b> | 42        | 243–245.5  | C <sub>25</sub> H <sub>23</sub> FeN <sub>3</sub> O <sub>2</sub> | 453.32 | 454.0 (M+1) <sup>+</sup> | C, 66.24; H, 5.11; N, 9.27  |
| <b>33</b> | 50        | 225–227    | C <sub>26</sub> H <sub>25</sub> FeN <sub>3</sub> O <sub>2</sub> | 467.35 | 468.1 (M+1) <sup>+</sup> | C, 66.82; H, 5.39; N, 8.99  |



Table S9. IR,  $^1\text{H}$  and  $^{13}\text{C}$  NMR spectroscopic data for harmicenes **30–33**

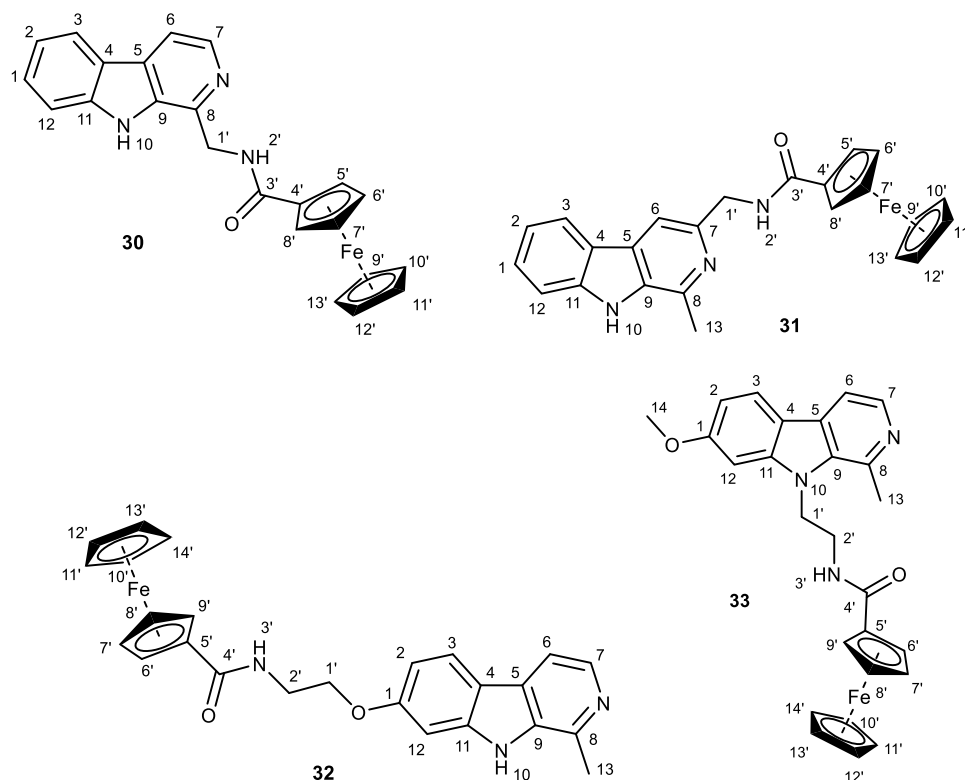

| Compd.    | IR (ATR, $\nu/\text{cm}^{-1}$ )                                                                                                                                             | $^1\text{H}$ NMR (DMSO- $d_6$ , $\delta$ ppm)                                                                                                                                                                                                                                                                                         | $^{13}\text{C}$ NMR (DMSO- $d_6$ , $\delta$ ppm)                                                                                                                                                                                      |
|-----------|-----------------------------------------------------------------------------------------------------------------------------------------------------------------------------|---------------------------------------------------------------------------------------------------------------------------------------------------------------------------------------------------------------------------------------------------------------------------------------------------------------------------------------|---------------------------------------------------------------------------------------------------------------------------------------------------------------------------------------------------------------------------------------|
| <b>30</b> | 3623, 3467, 3085, 3050, 2962, 2928, 1711, 1649, 1622, 1531, 1503, 1444, 1408, 1375, 1340, 1300, 1249, 1229, 1195, 138, 1123, 1106, 1041, 1017, 914, 819, 801, 634, 598, 558 | 11.49 (s, 1H, 10), 8.58 (t, 1H, 2', $J = 6.0$ Hz), 8.31 (d, 1H, 7, $J = 5.2$ Hz), 8.23 (d, 1H, 3, $J = 7.8$ Hz), 8.05 (d, 1H, 6, $J = 5.2$ Hz), 7.68 (d, 1H, 12, $J = 8.2$ Hz), 7.56 (t, 1H, 1, $J = 7.6$ Hz), 7.25 (t, 1H, 2, $J = 7.5$ Hz), 4.88–4.87 (m, 4H, 1', 5', 8'), 4.35 (t, 2H, 6', 7', $J = 1.9$ Hz), 4.07 (s, 5H, 9'–13') | 169.83 (3'), 142.64 (8), 140.17 (11), 137.35 (7), 133.55 (9), 128.10 (3), 127.74 (5), 121.74 (1), 120.93 (4), 119.37 (2), 113.86 (6), 111.99 (12), 76.11 (4'), 70.10 (5', 8'), 69.31 (9'–13'), 68.30 (6', 7'), 41.73 (1')             |
| <b>31</b> | 3324, 3226, 1634, 1574, 1532, 1498, 1447, 1380, 1348, 1297, 1248, 1104, 1026, 901, 814, 755, 738, 629, 528, 482                                                             | 11.51 (s, 1H, 10), 8.47 (t, 1H, 2', $J = 6.1$ Hz), 8.12 (d, 1H, 3, $J = 7.9$ Hz), 7.89 (s, 1H, 6), 7.57 (d, 1H, 12, $J = 8.2$ Hz), 7.52–7.48 (m, 1H, 1), 7.21–7.17 (m, 1H, 2), 4.90 (t, 2H, 5', 8', $J = 1.9$ Hz), 4.60 (d, 2H, 1', $J = 6.0$ Hz), 4.37 (t, 2H, 6', 7', $J = 1.9$ Hz), 4.20 (s, 5H, 9'–13'), 2.78 (s, 3H, 13)         | 168.94 (3'), 147.17 (7), 141.14 (8), 140.76 (11), 133.49 (9), 127.78 (3), 127.66 (5), 121.35 (1), 120.95 (4), 119.16 (2), 111.98 (12), 109.47 (6), 76.73 (4'), 69.96 (5', 8'), 69.25 (9'–13'), 68.28 (6', 7'), 44.31 (1'), 20.27 (13) |

|           |                                                                                                                                                                                    |                                                                                                                                                                                                                                                                                                                                                                 |                                                                                                                                                                                                                                                              |
|-----------|------------------------------------------------------------------------------------------------------------------------------------------------------------------------------------|-----------------------------------------------------------------------------------------------------------------------------------------------------------------------------------------------------------------------------------------------------------------------------------------------------------------------------------------------------------------|--------------------------------------------------------------------------------------------------------------------------------------------------------------------------------------------------------------------------------------------------------------|
| <b>32</b> | 3216, 1716, 1622, 1551, 1451, 1422, 1376, 1312, 1278, 1236, 1217, 1105, 960, 842, 801, 741, 641, 605, 505, 476                                                                     | 11.41 (s, 1H, 10), 8.14 (d, 1H, 7, $J = 5.3$ Hz), 8.07–8.05 (m, 2H, 3', 3), 7.79 (d, 1H, 6, $J = 5.3$ Hz), 7.07 (d, 1H, 12, $J = 2.4$ Hz), 6.90 (dd, 1H, 2, $J = 8.7, 2.2$ Hz), 4.83 (t, 2H, 6', 9', $J = 2.0$ Hz), 4.35 (t, 2H, 7', 8', $J = 1.9$ Hz), 4.23 (t, 2H, 1', $J = 5.7$ Hz), 4.13 (s, 5H, 10'–14'), 3.63 (q, 2H, 2', $J = 5.7$ Hz), 2.71 (s, 3H, 13) | 169.36 (4'), 159.31 (1), 141.89 (8), 141.28 (11), 137.74 (7), 134.55 (9), 127.17 (5), 122.69 (3), 114.98 (4), 111.93 (6), 109.22 (2), 95.38 (12), 76.31 (5'), 70.01 (6', 9'), 69.40 (10'–14'), 68.22 (7', 8'), 66.40 (1'), 38.49 (2'), 20.33 (13)            |
| <b>33</b> | 3623, 3467, 3085, 3050, 2962, 2928, 1711, 1649, 1622, 1531, 1503, 1444, 1408, 1375, 1340, 1300, 1249, 1229, 1195, 1177, 1138, 1123, 1107, 1041, 1016, 914, 819, 801, 634, 598, 558 | 8.17 (d, 1H, 7, $J = 5.1$ Hz), 8.10–8.07 (m, 2H, 3, 3'), 7.88 (d, 1H, 6, $J = 5.1$ Hz), 7.32 (d, 1H, 12, $J = 2.2$ Hz), 6.88 (dd, 1H, 2, $J = 8.5, 2.1$ Hz), 4.69 (t, 2H, 6', 9', $J = 1.9$ Hz), 4.66 (t, 2H, 1', $J = 7.1$ Hz), 4.34 (t, 2H, 7', 8', $J = 1.9$ Hz), 4.07 (s, 5H, 10'–14'), 3.91 (s, 3H, 14), 3.60 (q, 2H, 2', $J = 6.7$ Hz), 3.04 (s, 3H, 13)  | 169.75 (4'), 160.52(1), 143.00 (8), 140.66 (11), 137.82 (7), 134.67 (9), 128.43 (5), 122.39 (3), 114.28 (4), 112.26 (6), 109.20 (2), 93.78 (12), 76.40 (5'), 69.93 (6', 9'), 69.32 (10'–14'), 68.08 (7', 8'), 55.50 (14), 43.56 (1'), 39.10 (2'), 23.14 (13) |

Table S10. Analytical and MS data for harmicenes **34–37**

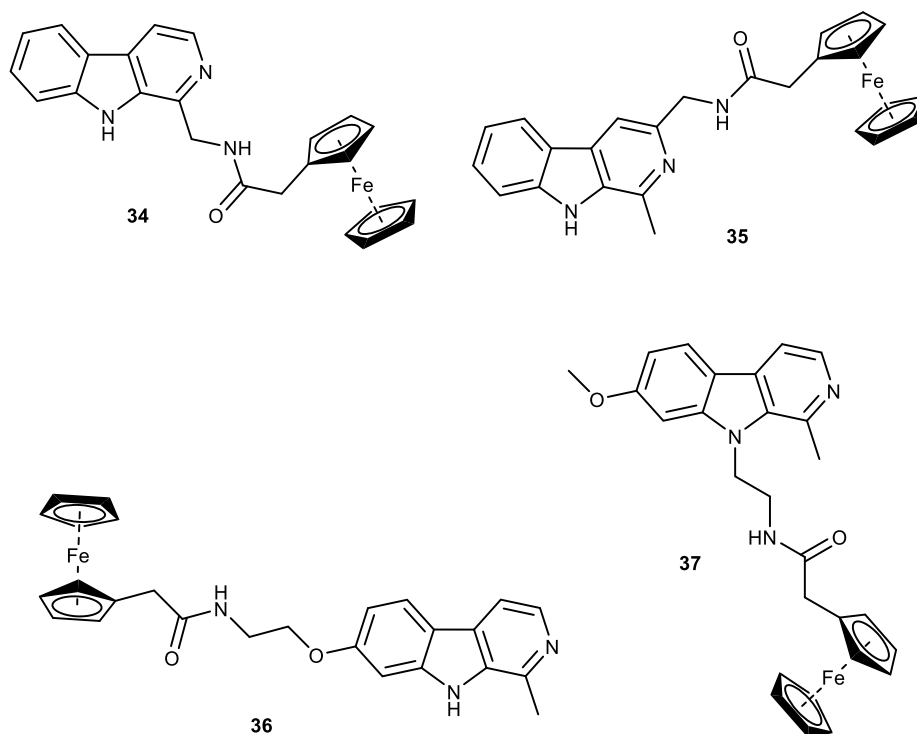

| Compd.    | Yield (%) | <i>t</i> <sub>f</sub> (°C) | Molecular formula                                               | <i>M</i> <sub>r</sub> | MS ( <i>m/z</i> )        | CHN                        |
|-----------|-----------|----------------------------|-----------------------------------------------------------------|-----------------------|--------------------------|----------------------------|
| <b>34</b> | 34        | 222–224.5                  | C <sub>24</sub> H <sub>21</sub> FeN <sub>3</sub> O              | 423.30                | 424.1 (M+1) <sup>+</sup> | C, 68.10; H, 5.00; N, 9.93 |
| <b>35</b> | 39        | 247.5–250                  | C <sub>25</sub> H <sub>23</sub> FeN <sub>3</sub> O              | 437.32                | 438.0 (M+1) <sup>+</sup> | C, 68.66; H, 5.30; N, 9.61 |
| <b>36</b> | 58        | 176–177.5                  | C <sub>26</sub> H <sub>25</sub> FeN <sub>3</sub> O <sub>2</sub> | 467.35                | 468.1 (M+1) <sup>+</sup> | C, 66.82; H, 5.39; N, 8.99 |
| <b>37</b> | 69        | 170.5–172                  | C <sub>27</sub> H <sub>27</sub> FeN <sub>3</sub> O <sub>2</sub> | 481.38                | 482.2 (M+1) <sup>+</sup> | C, 67.37; H, 5.65; N, 8.73 |

Table S11. IR, <sup>1</sup>H and <sup>13</sup>C NMR spectroscopic data for harmicenes **34–37**

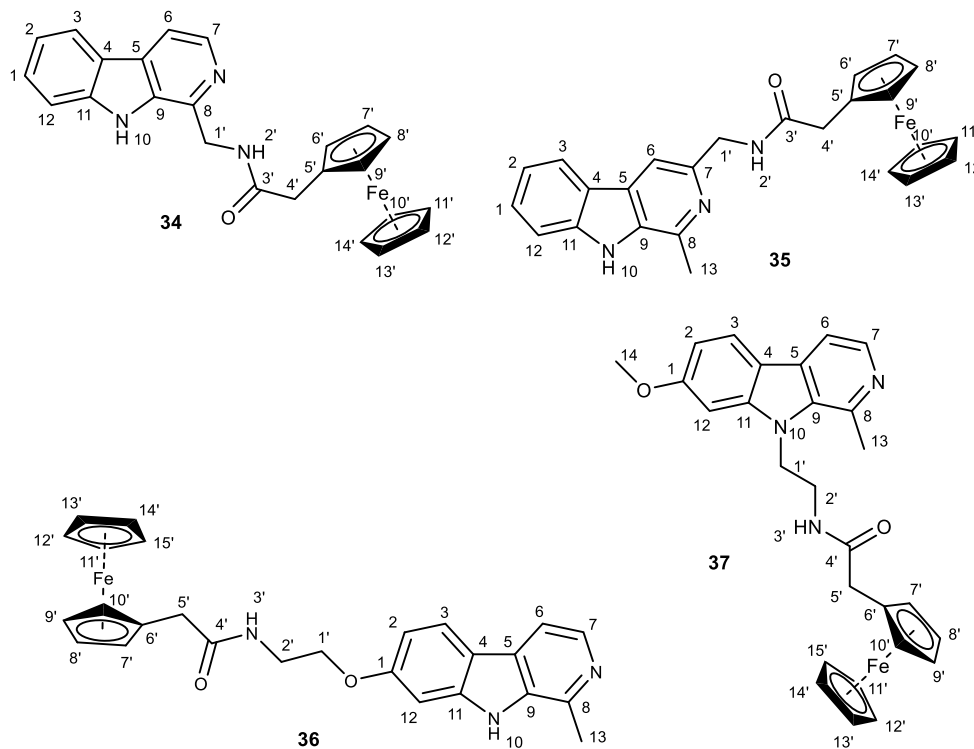

| Compd.    | IR (ATR, $\nu$ cm <sup>-1</sup> )                                                                                                                                    | <sup>1</sup> H NMR (DMSO- <i>d</i> <sub>6</sub> , $\delta$ ppm)                                                                                                                                                                                                                                                                                                                                                | <sup>13</sup> C NMR (DMSO- <i>d</i> <sub>6</sub> , $\delta$ ppm)                                                                                                                                                                       |
|-----------|----------------------------------------------------------------------------------------------------------------------------------------------------------------------|----------------------------------------------------------------------------------------------------------------------------------------------------------------------------------------------------------------------------------------------------------------------------------------------------------------------------------------------------------------------------------------------------------------|----------------------------------------------------------------------------------------------------------------------------------------------------------------------------------------------------------------------------------------|
| <b>34</b> | 3333, 3219, 3168, 3099, 2995, 2898, 1651, 1568, 1521, 1502, 1445, 1436, 1413, 1361, 1321, 1285, 1248, 1151, 1106, 1045, 1026, 999, 878, 820, 740, 677, 595, 564, 504 | 11.50 (s, 1H, 10), 8.55 (t, 1H, 2', <i>J</i> = 5.4 Hz), 8.29 (d, 1H, 7, <i>J</i> = 5.2 Hz), 8.22 (d, 1H, 3, <i>J</i> = 7.8 Hz), 8.04 (d, 1H, 6, <i>J</i> = 5.2 Hz), 7.63 (d, 1H, 12, <i>J</i> = 8.2 Hz), 7.55 (t, 1H, 1, <i>J</i> = 7.6 Hz), 7.25 (t, 1H, 2, <i>J</i> = 7.4 Hz), 4.76 (d, 2H, 1', <i>J</i> = 5.4 Hz), 4.22 (t, 2H, 6', 9', <i>J</i> = 1.9 Hz), 4.05 (m, 7H, 7', 8', 10'–14'), 3.26 (s, 2H, 4') | 170.47 (3'), 141.60 (8), 140.36 (11), 137.36 (7), 133.50 (9), 128.12 (3), 127.74 (5), 121.73 (1), 120.87 (4), 119.39 (2), 113.89 (6), 112.05 (12), 82.66 (5'), 68.58 (6', 9'), 68.41 (10'–14'), 67.11 (7', 8'), 41.52 (1'), 36.33 (4') |

|    |                                                                                                                                                                                                             |                                                                                                                                                                                                                                                                                                                                                                                                                                                            |                                                                                                                                                                                                                                                                                               |
|----|-------------------------------------------------------------------------------------------------------------------------------------------------------------------------------------------------------------|------------------------------------------------------------------------------------------------------------------------------------------------------------------------------------------------------------------------------------------------------------------------------------------------------------------------------------------------------------------------------------------------------------------------------------------------------------|-----------------------------------------------------------------------------------------------------------------------------------------------------------------------------------------------------------------------------------------------------------------------------------------------|
| 35 | 3404, 3191, 3081,<br>2944, 1649, 1621,<br>1570, 1522, 1471,<br>1455, 1421, 1312,<br>1247, 1267, 1136,<br>1103, 1038, 1023,<br>997, 925, 826,<br>803, 753, 741,<br>693, 621, 584,<br>543, 500, 482           | 11.48 (s, 1H, 10), 8.42 (t, 1H, 2',<br>$J = 5.9$ Hz), 8.10 (d, 1H, 3, $J =$<br>7.8 Hz), 7.73 (s, 1H, 6), 7.56 (d,<br>1H, 12, $J = 8.2$ Hz), 7.52–7.50<br>(m, 1H, 1), 7.21 (t, 1H, 2, $J = 7.4$<br>Hz), 4.46 (d, 2H, 1', $J = 5.8$ Hz),<br>4.27 (t, 2H, 6', 9', $J = 1.9$ Hz),<br>4.12 (s, 5H, 10'–14'), 4.10 (t, 2H,<br>7', 8', $J = 1.9$ Hz), 3.24 (s, 2H, 4'),<br>2.73 (s, 3H, 13)                                                                       | 169.93 (3'), 146.33 (7), 141.16 (8),<br>140.71 (11), 133.44 (9), 127.78 (3),<br>127.66 (5), 121.49 (1), 120.98 (4),<br>119.11 (2), 111.94 (12), 109.54 (6),<br>83.05 (5'), 68.63 (6', 9'), 68.45 (10'–<br>14'), 67.15 (7', 8'), 44.28 (1'), 36.72<br>(4'), 20.28 (13)                         |
| 36 | 3222, 3055, 2875,<br>1656, 1630, 1539,<br>1484, 1434, 1378,<br>1324, 1299, 1273,<br>1238, 1174, 1134,<br>1106, 1073, 1037,<br>1023, 1002, 961,<br>924, 871, 814,<br>776, 738, 661,<br>634, 590, 567,<br>484 | 11.40 (s, 1H, 10), 8.19 (t, 1H, 3',<br>$J = 5.5$ Hz), 8.14 (d, 1H, 7, $J =$<br>5.3 Hz), 8.05 (d, 1H, 3, $J = 8.6$<br>Hz), 7.80 (d, 1H, 6, $J = 5.3$ Hz),<br>7.02 (d, 1H, 12, $J = 2.2$ Hz), 6.85<br>(dd, 1H, 2, $J = 8.6, 2.2$ Hz), 4.20<br>(t, 2H, 7', 10', $J = 1.9$ Hz), 4.13<br>(t, 2H, 1', $J = 5.5$ Hz), 4.11 (s,<br>5H, 11'–15'), 4.05 (t, 2H, 8', 9', $J$<br>$= 1.9$ Hz), 3.51 (q, 2H, 2', $J = 5.6$<br>Hz), 3.16 (s, 2H, 5'), 2.72 (s, 3H,<br>13) | 170.25 (4'), 159.17 (1), 141.84 (8),<br>141.29 (11), 137.75 (7), 134.56 (9),<br>127.16 (5), 122.63 (3), 115.00 (4),<br>111.93 (6), 109.30 (2), 95.40 (12),<br>82.72 (6'), 68.50 (7', 10'), 68.43 (11'–<br>15'), 67.08 (8', 9'), 66.55 (1'), 38.40<br>(2'), 36.37 (5'), 20.35 (13)             |
| 37 | 3341, 2931, 1655,<br>1624, 1566, 1503,<br>1451, 1439, 1410,<br>1347, 1330, 1300,<br>1251, 1195, 1172,<br>1141, 1104, 1048,<br>1024, 929, 835,<br>813, 794, 639,<br>567, 496, 482                            | 8.17 (d, 1H, 7, $J = 5.1$ Hz), 8.09<br>(d, 1H, 3, $J = 8.6$ Hz), 8.01 (t, 1H,<br>3', $J = 6.0$ Hz), 7.88 (d, 1H, 6, $J$<br>$= 5.1$ Hz), 7.27 (d, 1H, 12, $J = 2.2$<br>Hz), 6.89 (dd, 1H, 2, $J = 8.6, 2.2$<br>Hz), 4.57 (t, 2H, 1', $J = 7.1$ Hz),<br>4.13 (t, 2H, 7', 10', $J = 1.9$ Hz),<br>4.11 (s, 5H, 11'–15'), 4.05 (t, 2H,<br>8', 9', $J = 1.8$ Hz), 3.92 (s, 3H,<br>14), 3.45 (q, 2H, 2', $J = 6.7$ Hz),<br>3.07 (s, 2H, 5'), 2.95 (s, 3H, 13)     | 170.58 (4'), 160.52 (1), 142.86 (8),<br>140.61 (11), 137.80 (7), 134.64 (9),<br>128.43 (5), 122.40 (3), 114.31 (4),<br>112.25 (6), 109.24 (2), 93.64 (12),<br>82.12 (6'), 68.72 (7', 10'), 68.46 (11'–<br>15'), 67.21 (8', 9'), 55.52 (14), 43.37<br>(1'), 38.73 (2'), 36.65 (5'), 23.08 (13) |

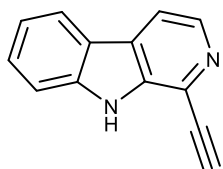

2

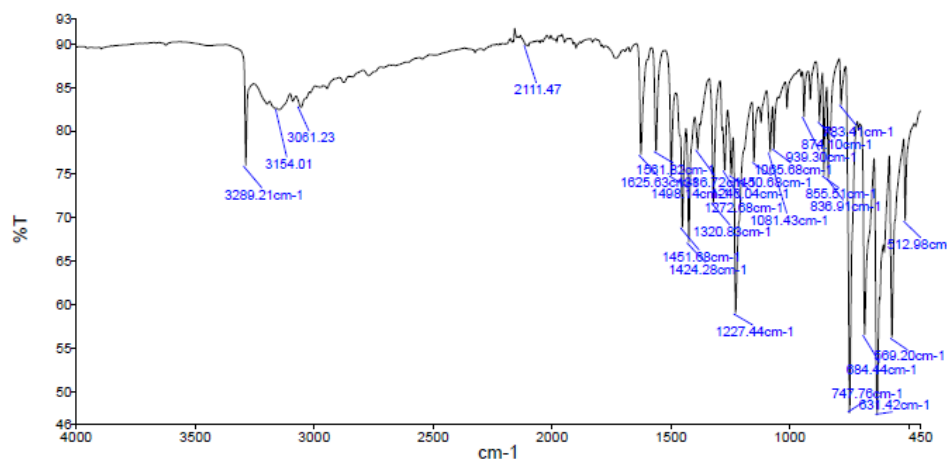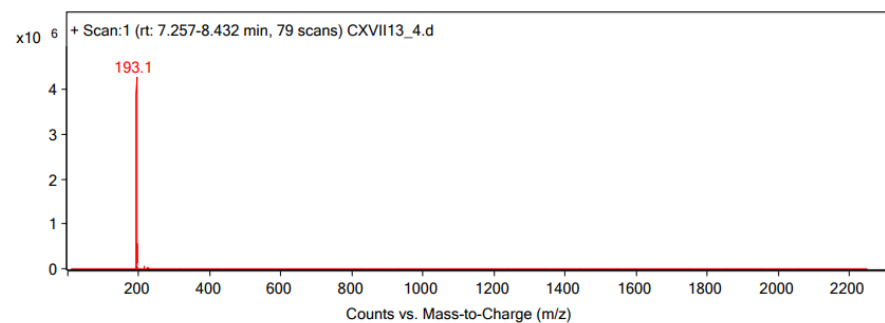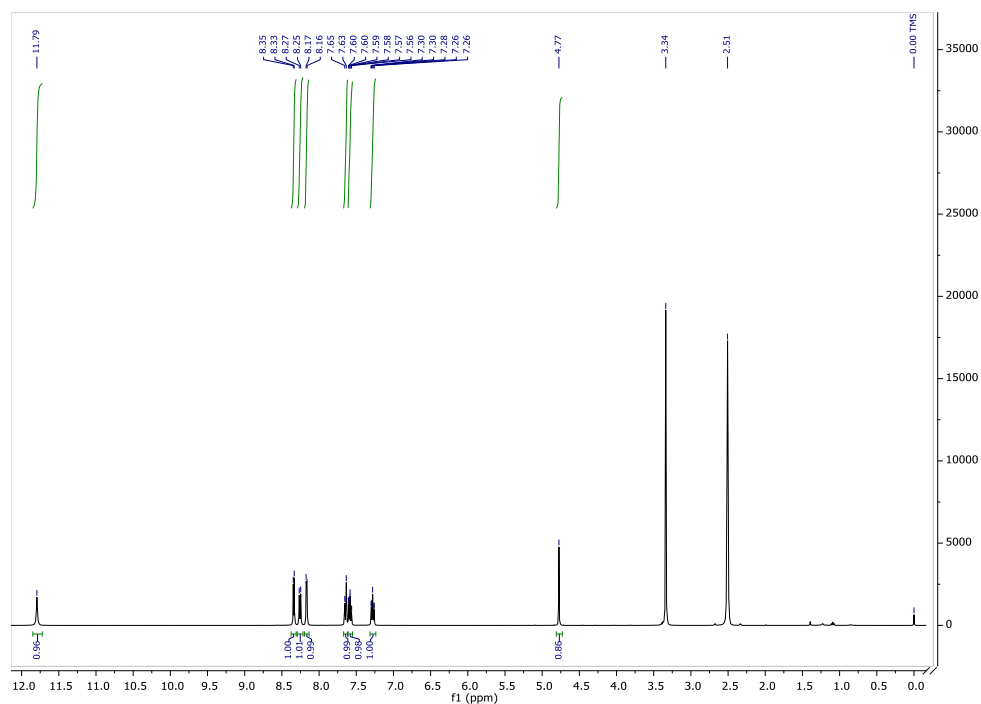

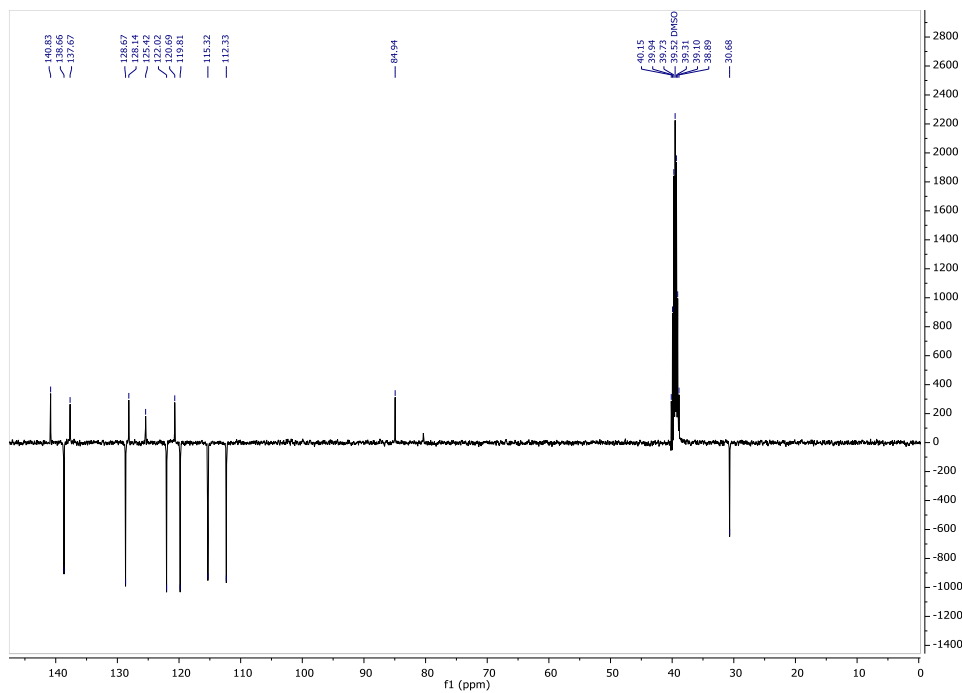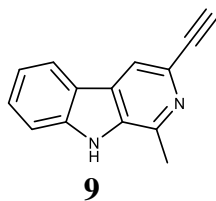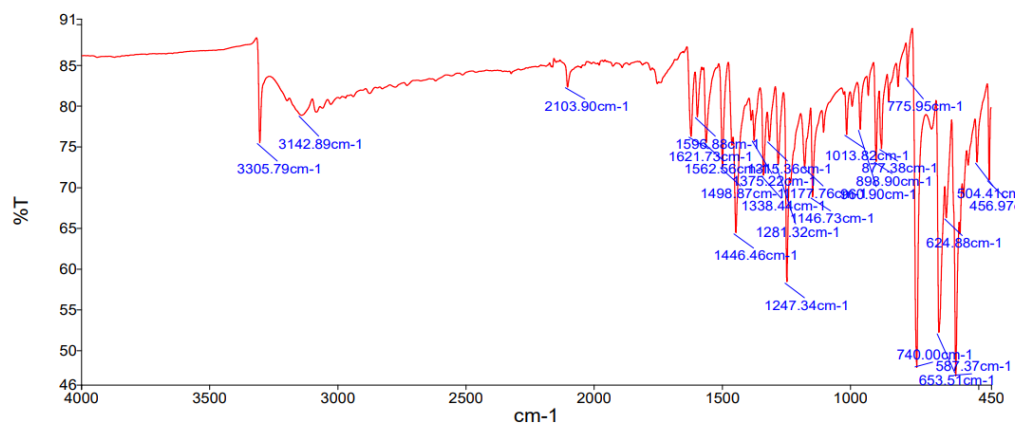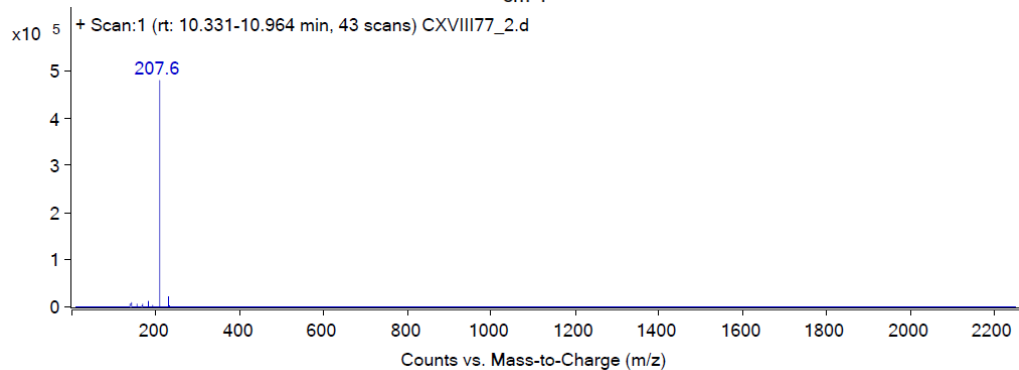

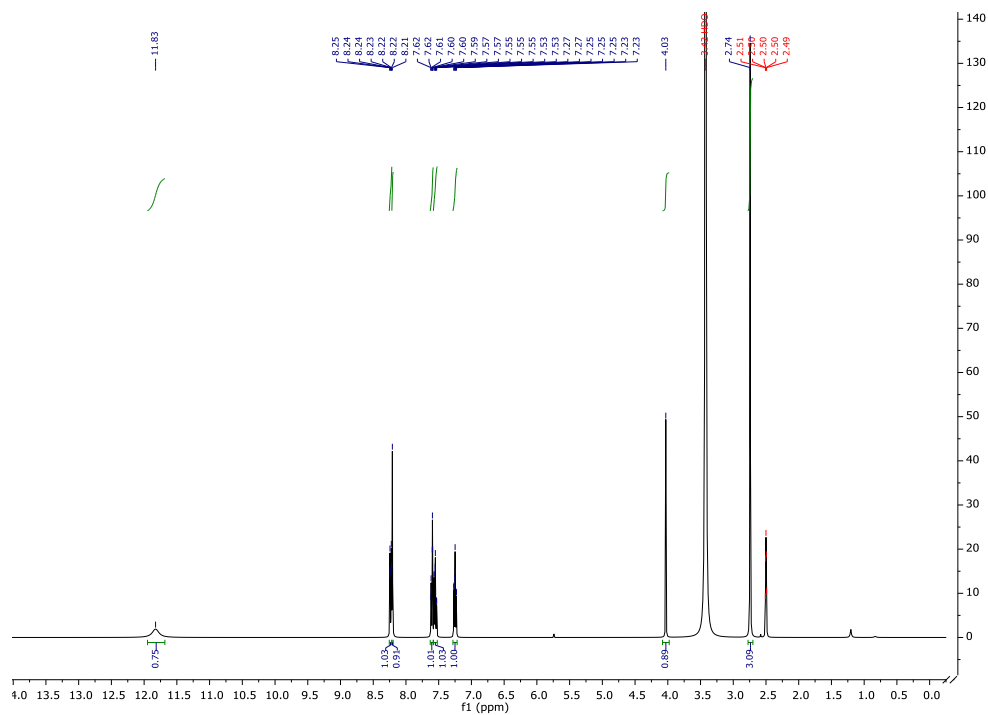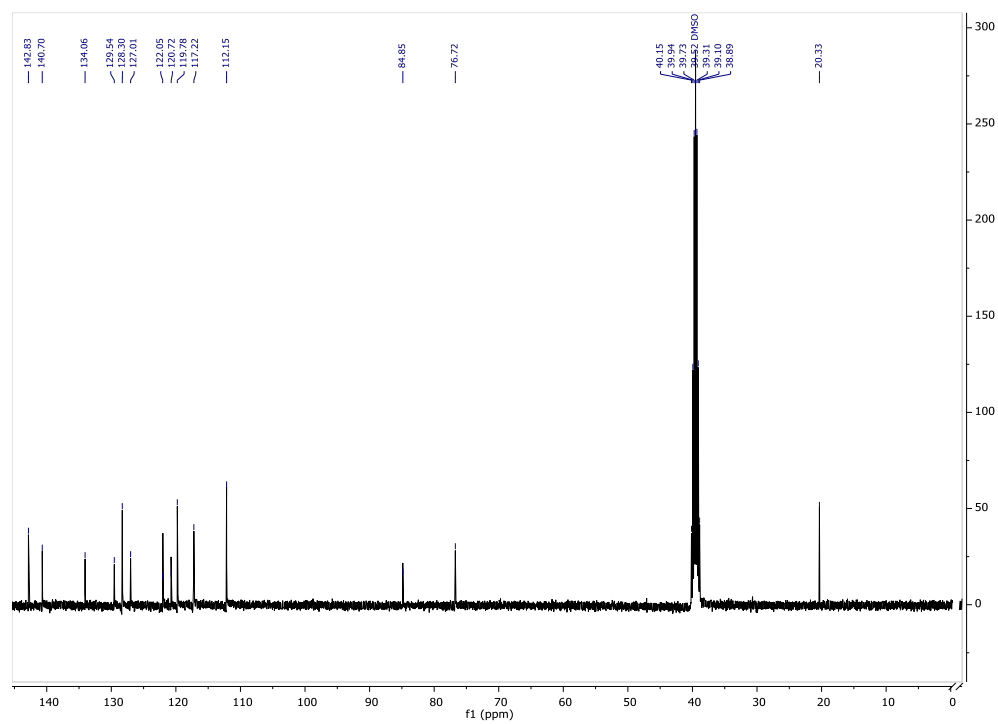

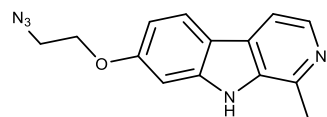

15

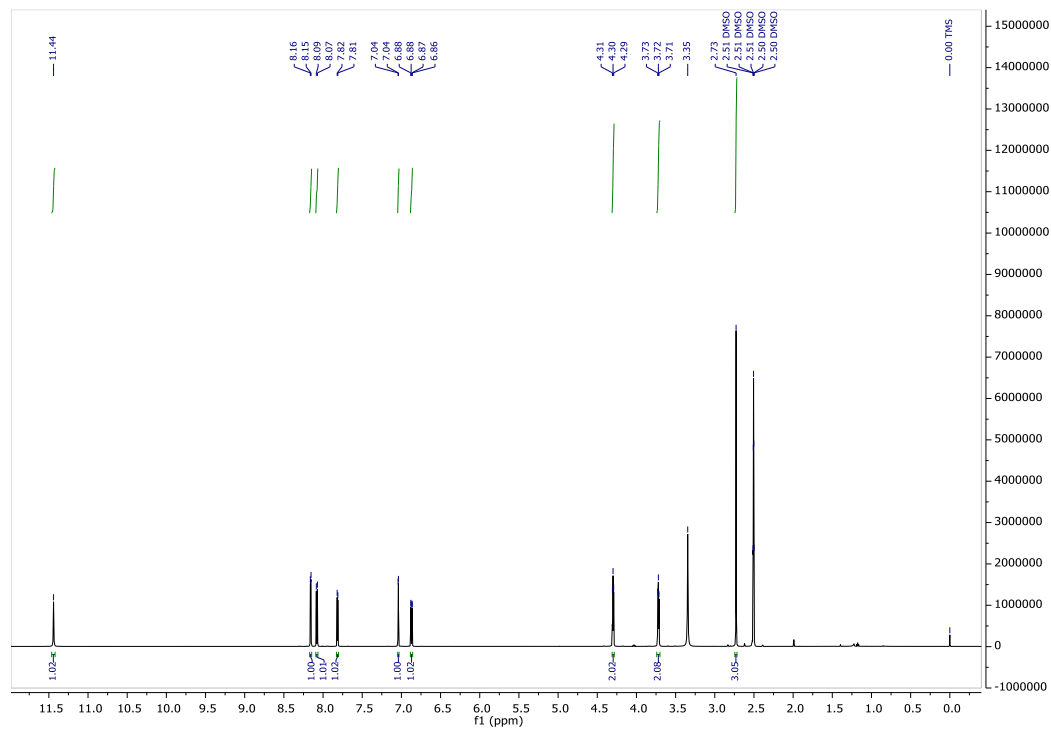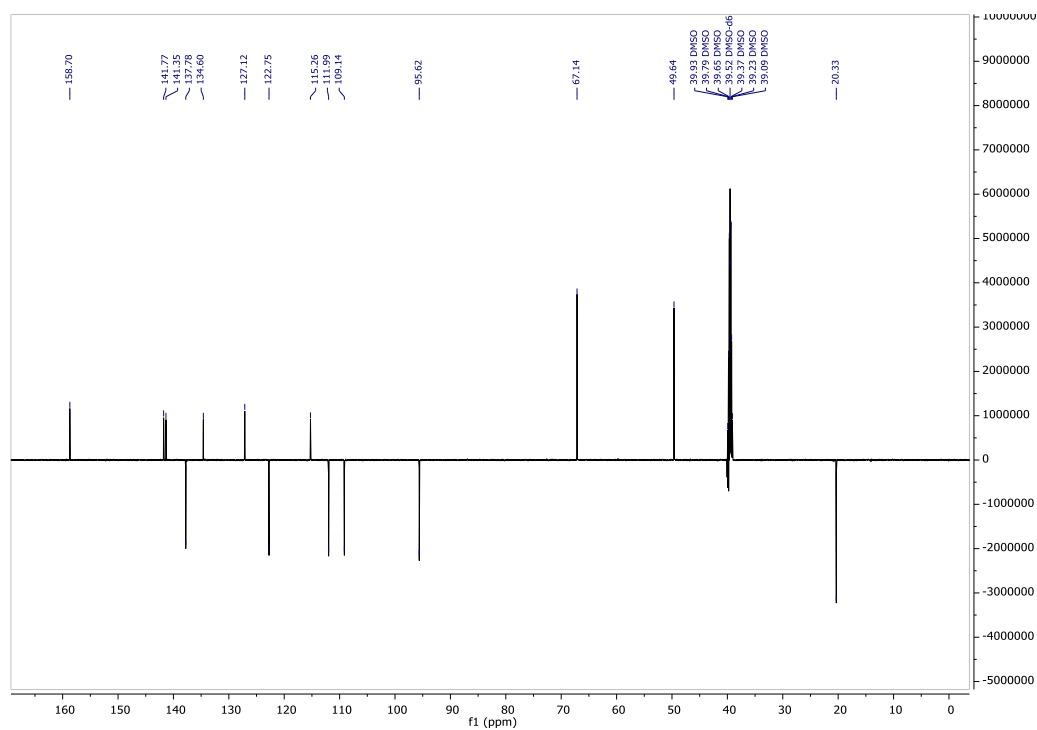



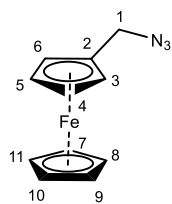

19

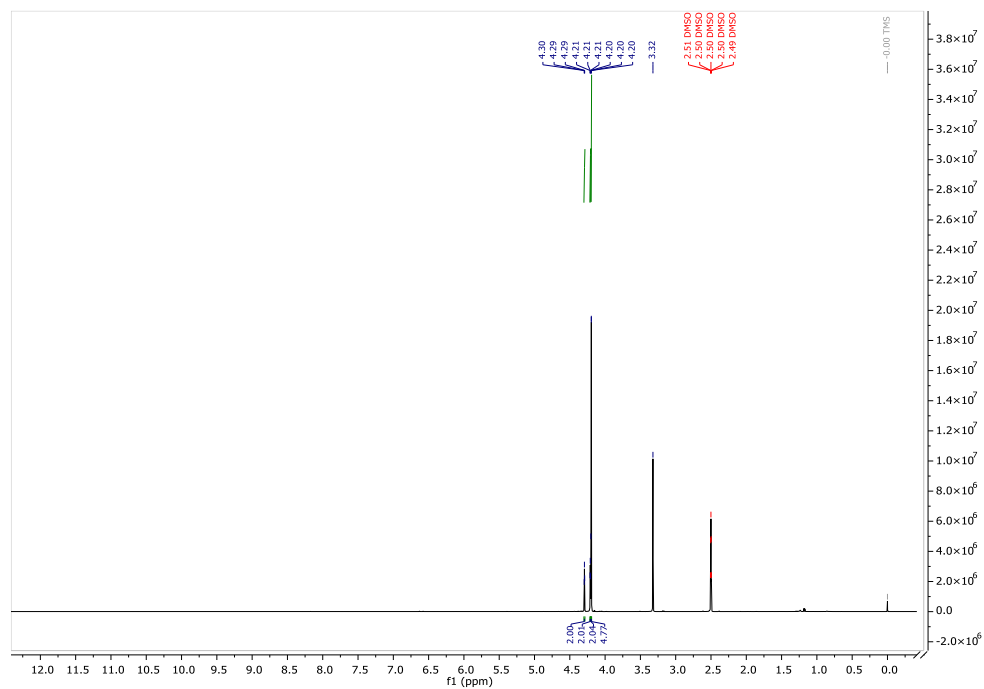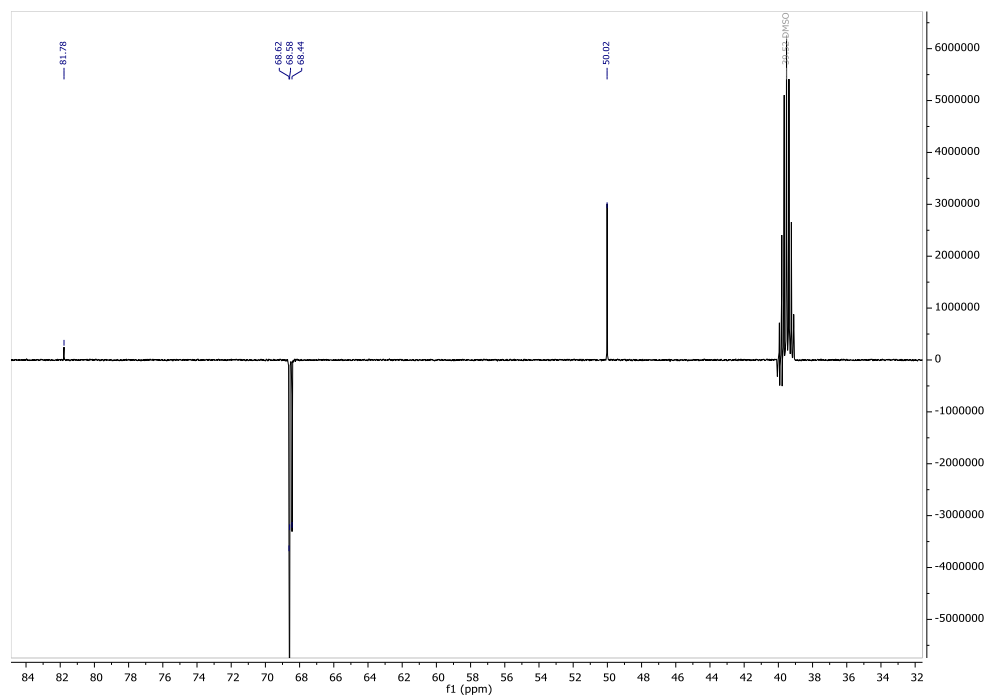

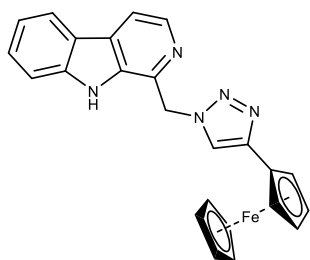

**20**

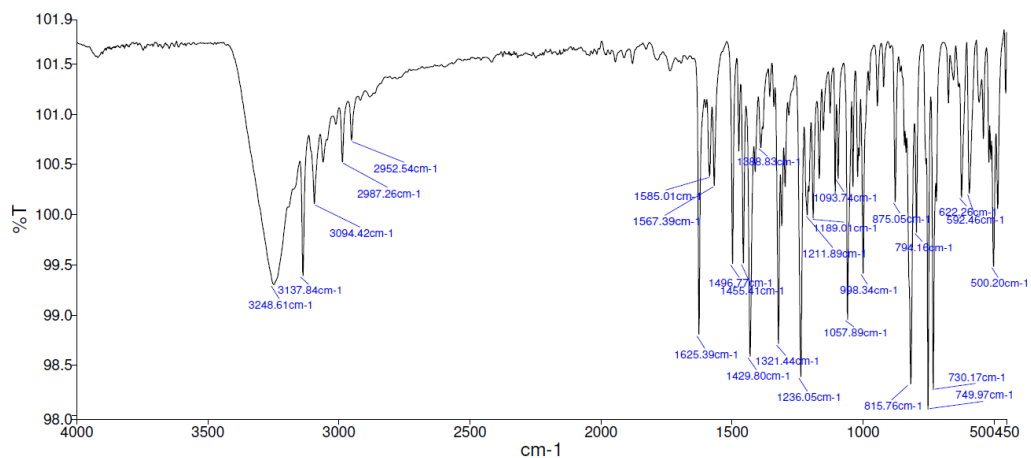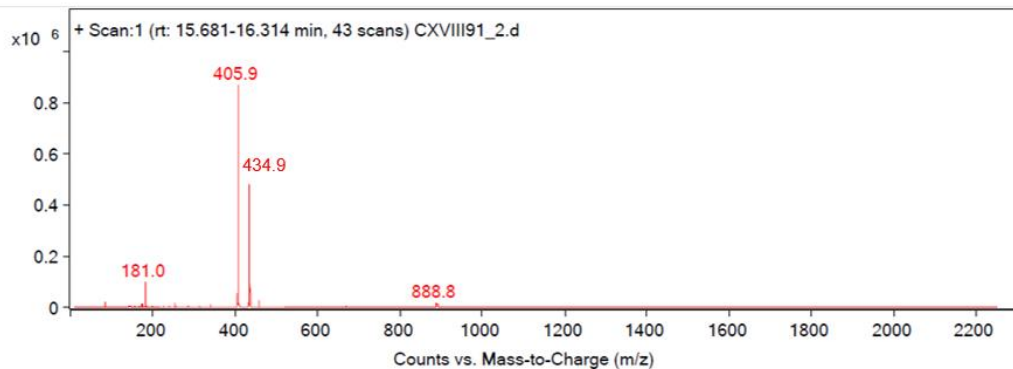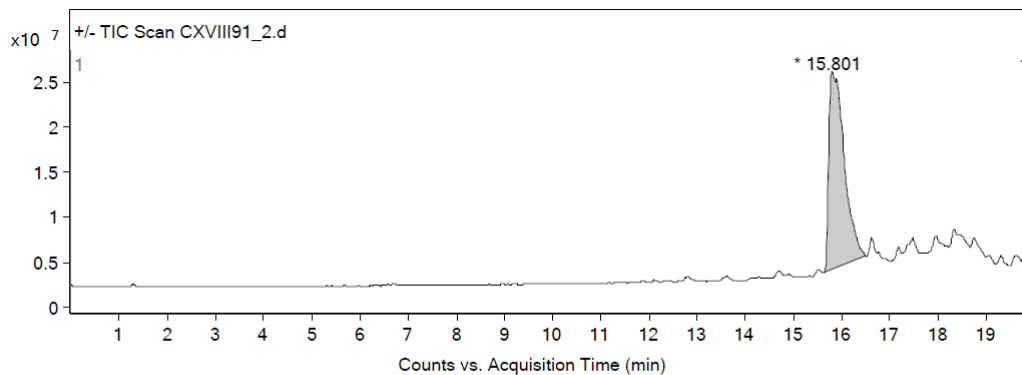

**Integration Peak List**

| Peak | Start | RT     | End    | Height      | Area         | Area % |
|------|-------|--------|--------|-------------|--------------|--------|
| 1    | 15.62 | 15.801 | 16.495 | 21919671.61 | 489627897.53 | 100    |

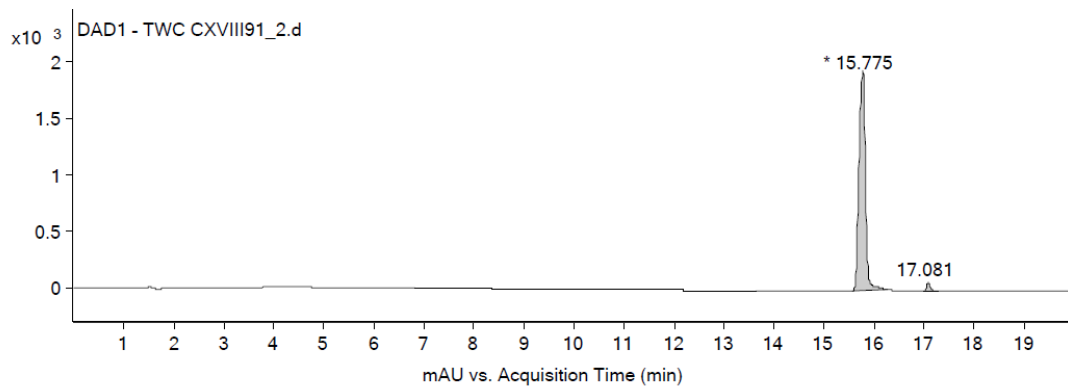

Integration Peak List

| Peak | Start  | RT     | End    | Height  | Area     | Area % |
|------|--------|--------|--------|---------|----------|--------|
| 1    | 15.568 | 15.775 | 16.281 | 1945.65 | 17575.54 | 100    |
| 2    | 17.002 | 17.081 | 17.281 | 69.71   | 327.96   | 1.87   |

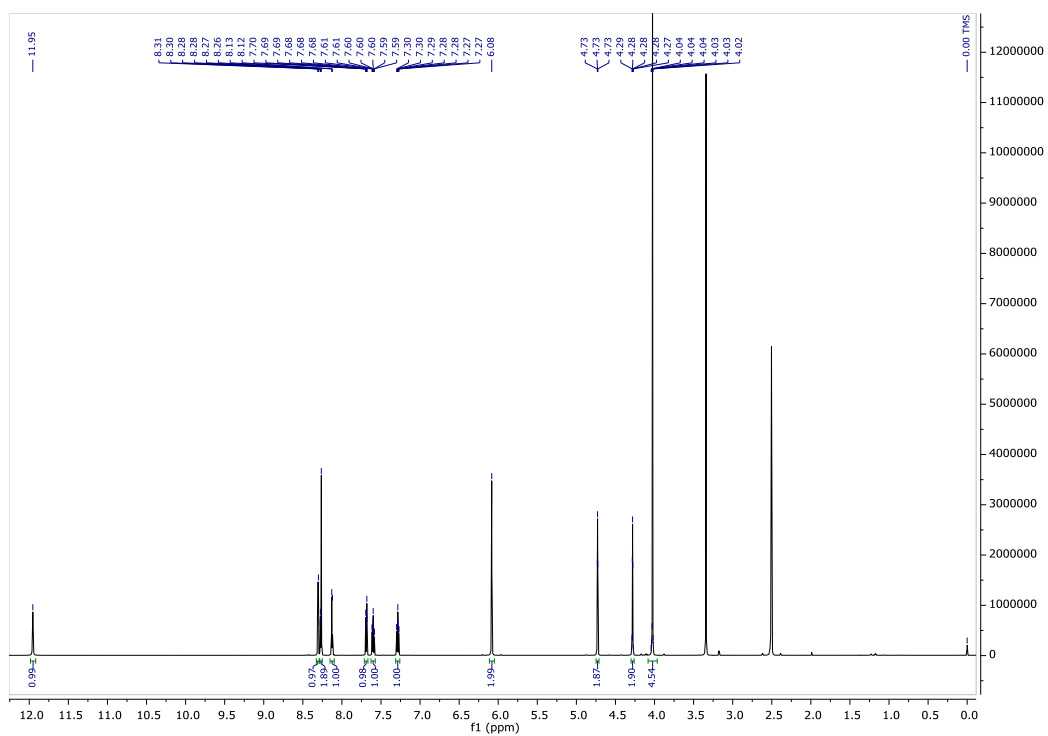

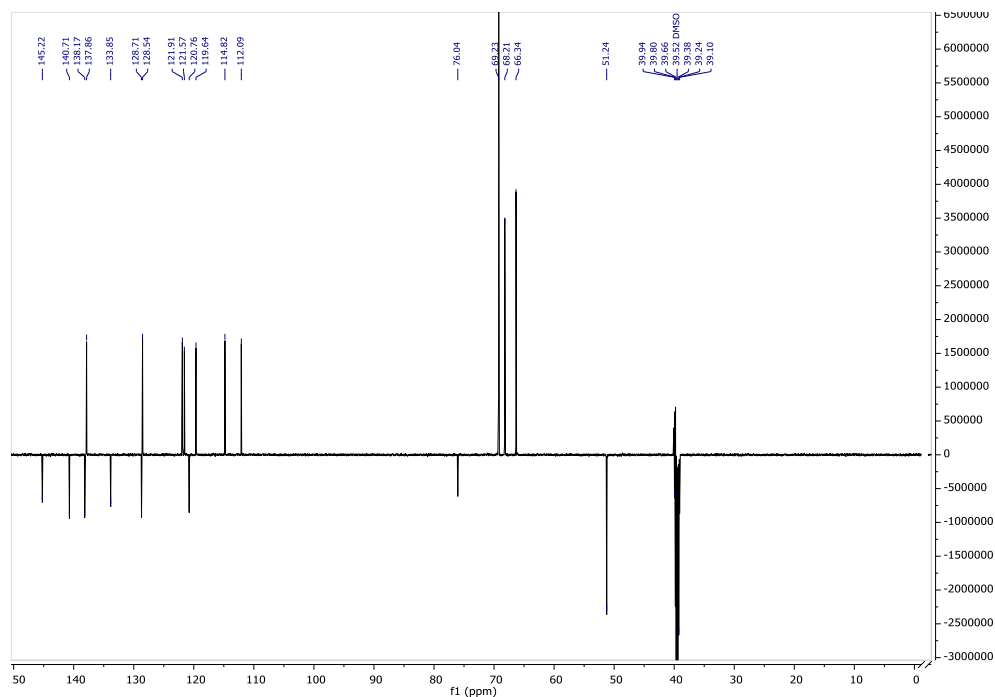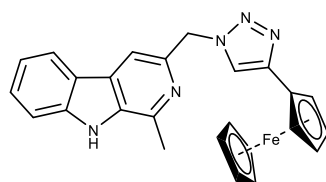

**21**

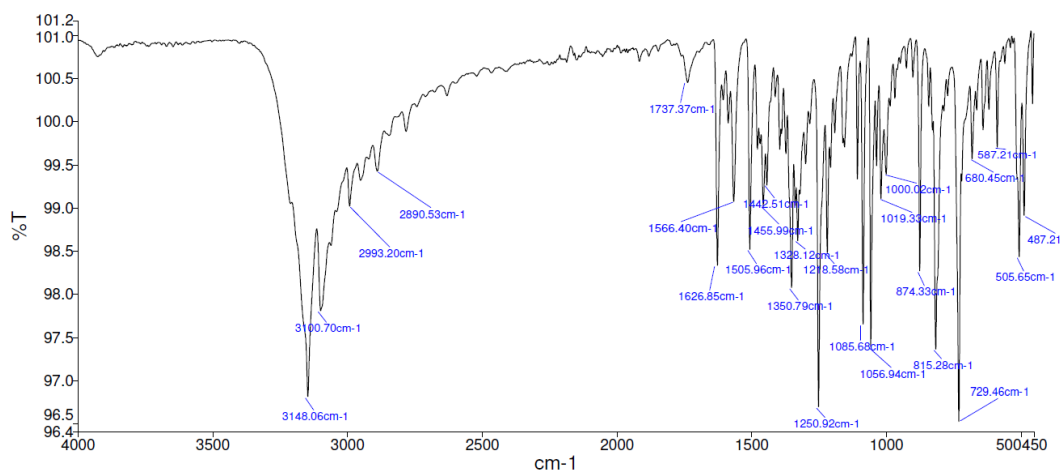

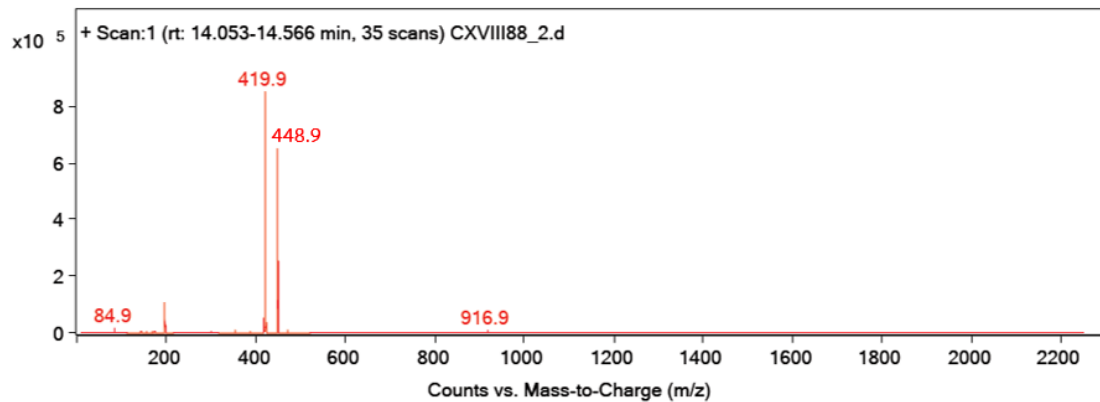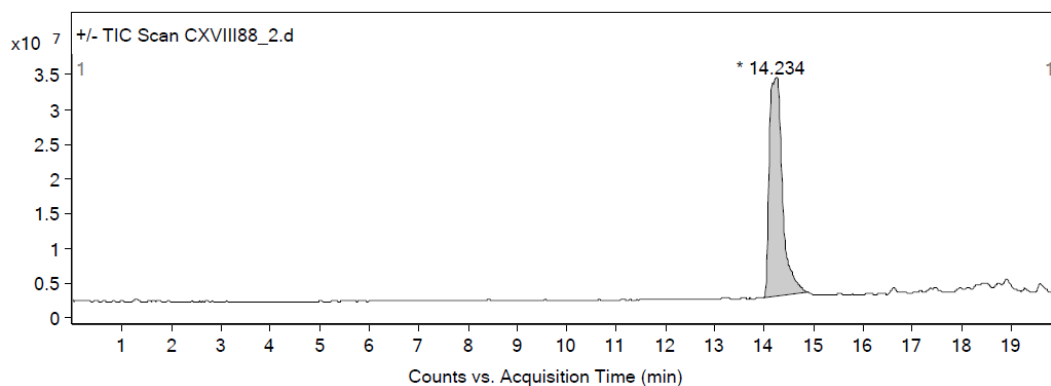

**Integration Peak List**

| Peak | Start  | RT     | End    | Height      | Area         | Area % |
|------|--------|--------|--------|-------------|--------------|--------|
| 1    | 13.978 | 14.234 | 14.897 | 31661829.12 | 575842089.03 | 100    |

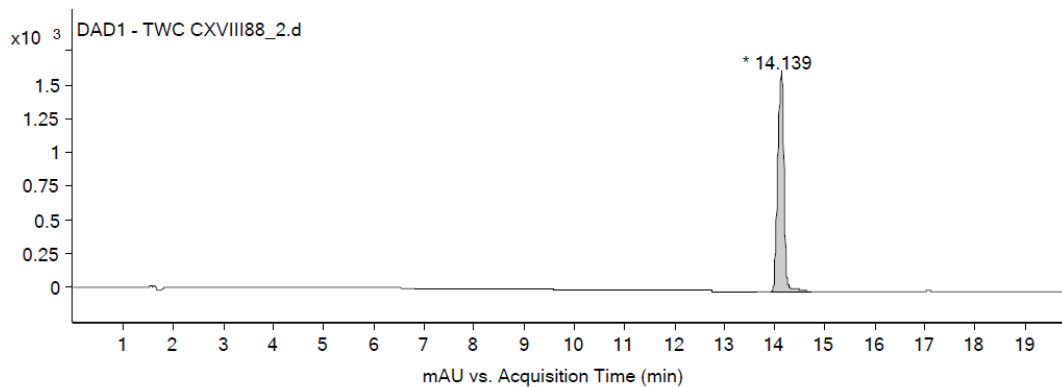

**Integration Peak List**

| Peak | Start  | RT     | End    | Height  | Area     | Area % |
|------|--------|--------|--------|---------|----------|--------|
| 1    | 13.936 | 14.139 | 14.726 | 1625.52 | 14001.55 | 100    |

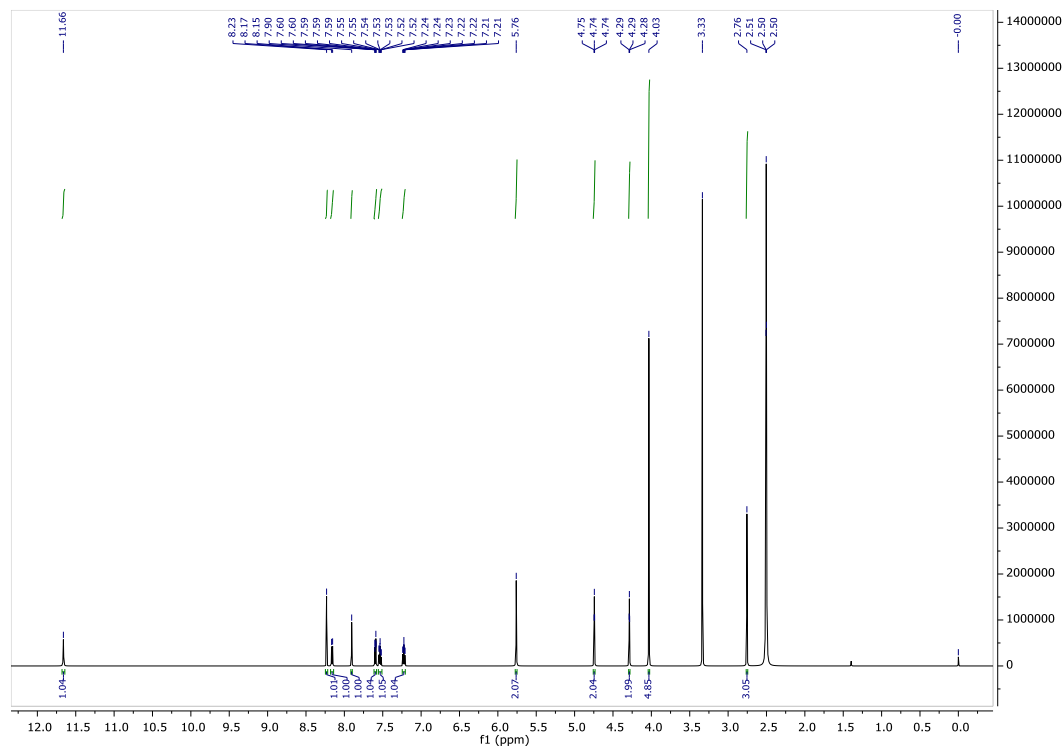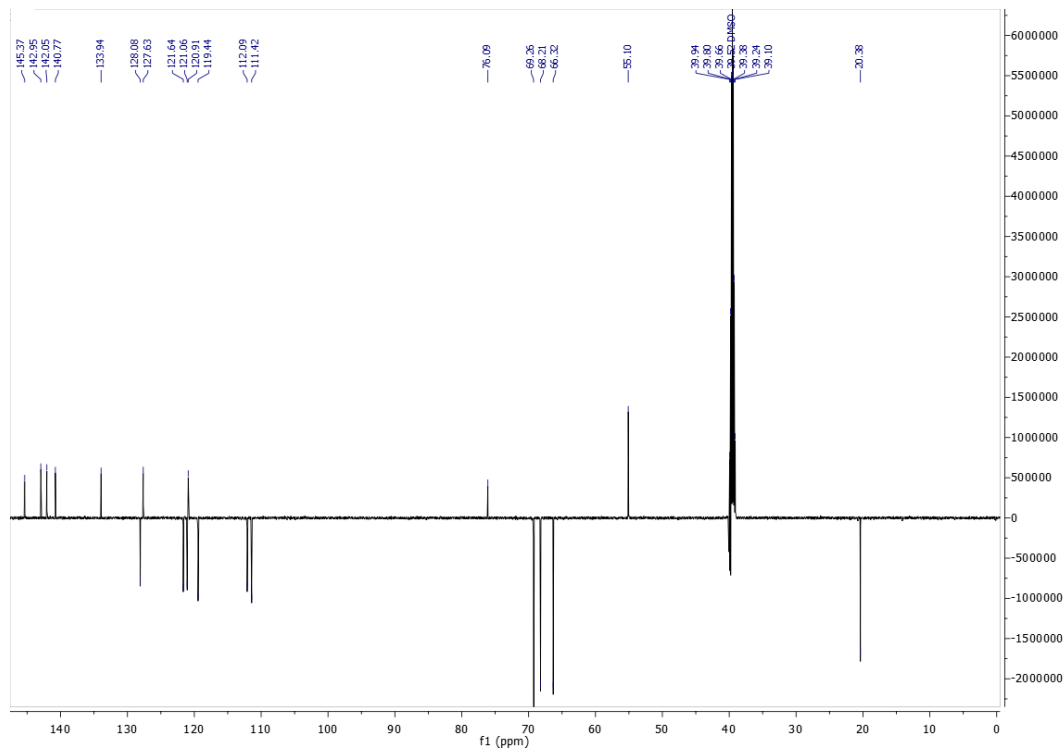

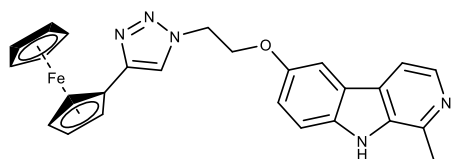

22

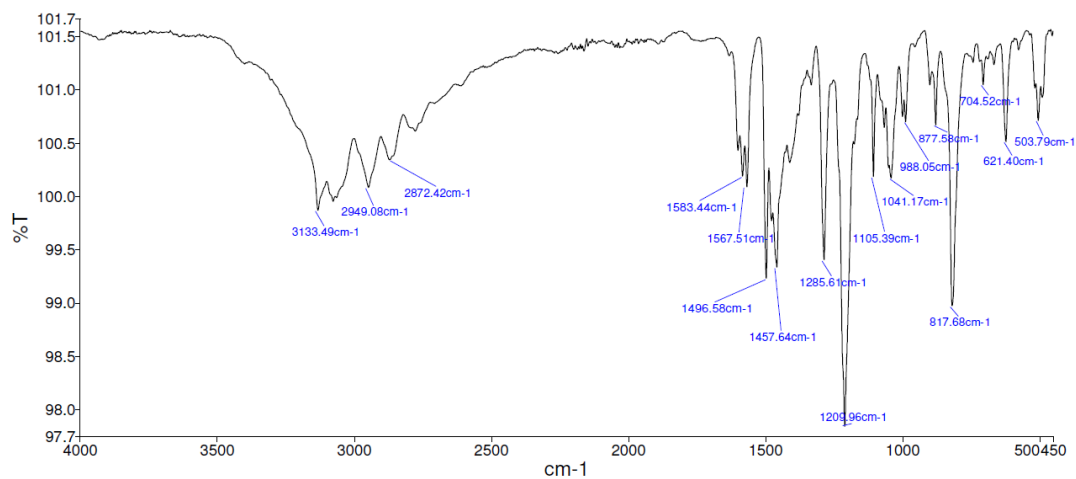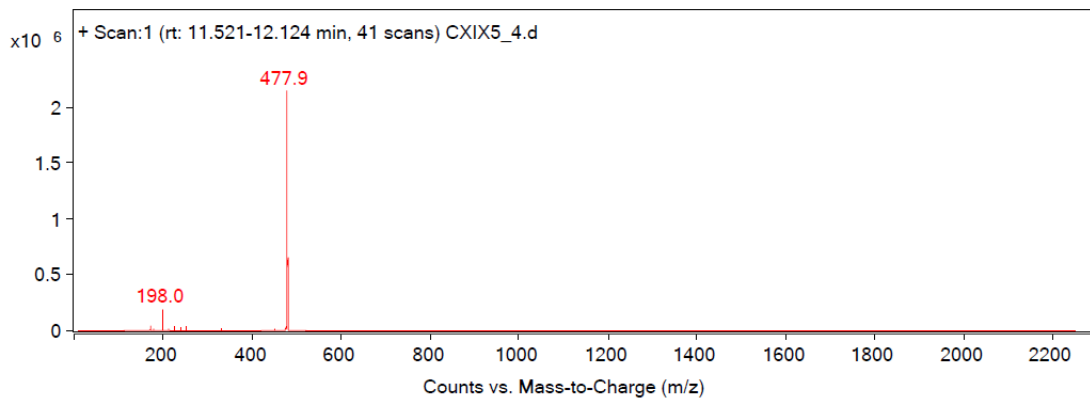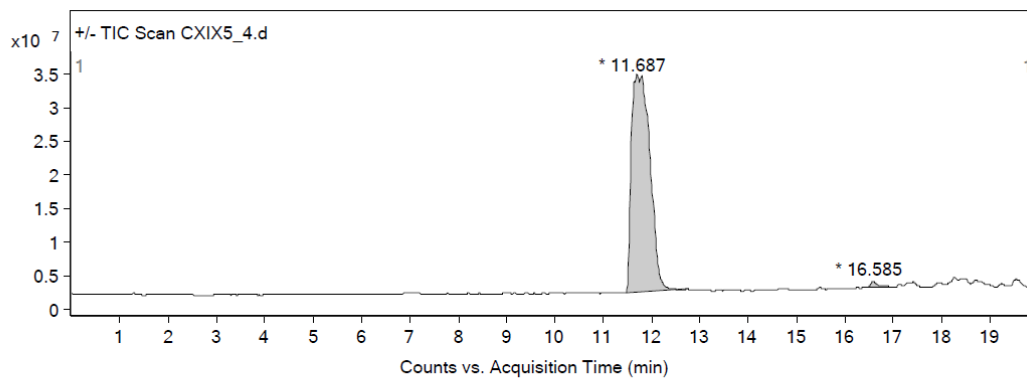

Integration Peak List

| Peak | Start  | RT     | End    | Height      | Area         | Area % |
|------|--------|--------|--------|-------------|--------------|--------|
| 1    | 11.476 | 11.687 | 12.757 | 32331990.89 | 849627736.64 | 100    |
| 2    | 16.434 | 16.585 | 16.947 | 911139.02   | 10049820.27  | 1.18   |

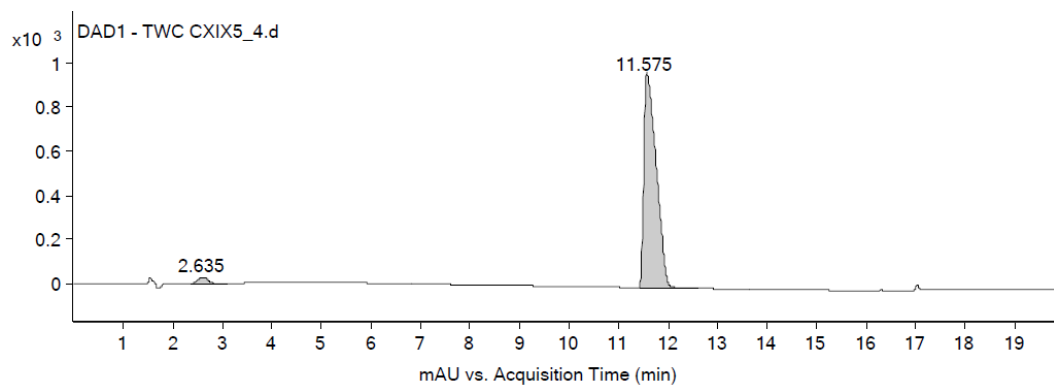

# Integration Peak List

| Peak | Start  | RT     | End    | Height | Area     | Area % |
|------|--------|--------|--------|--------|----------|--------|
| 1    | 2.369  | 2.635  | 3.081  | 26.47  | 374.29   | 2.22   |
| 2    | 11.416 | 11.575 | 12.586 | 977.51 | 16897.38 | 100    |

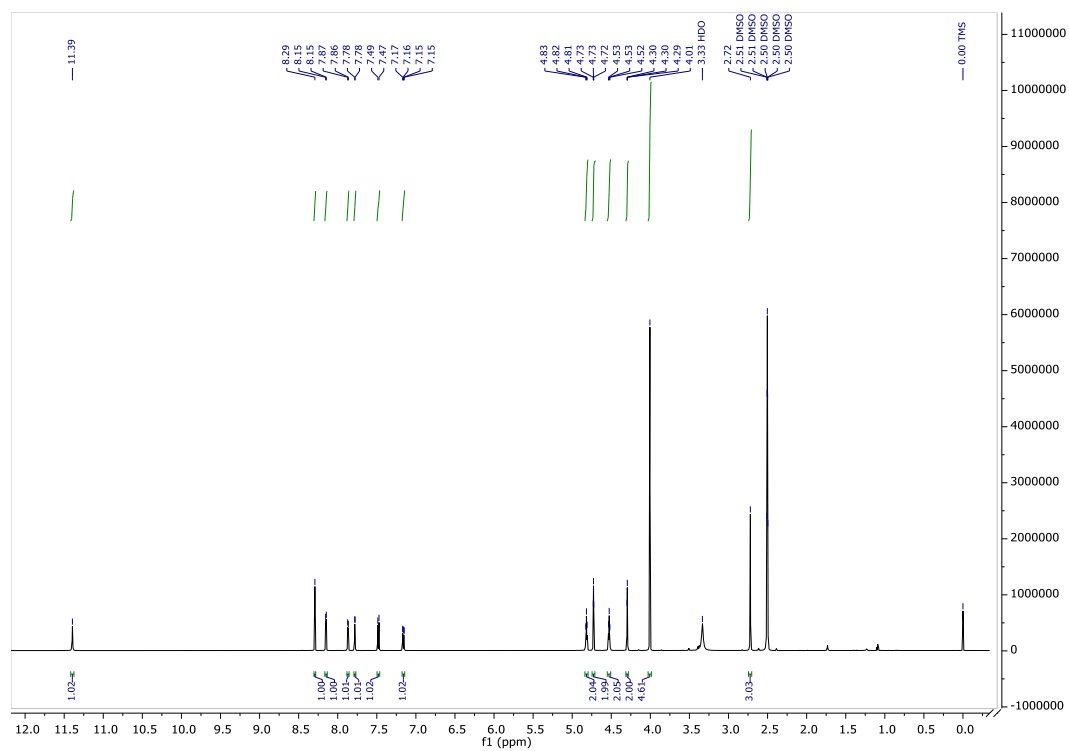



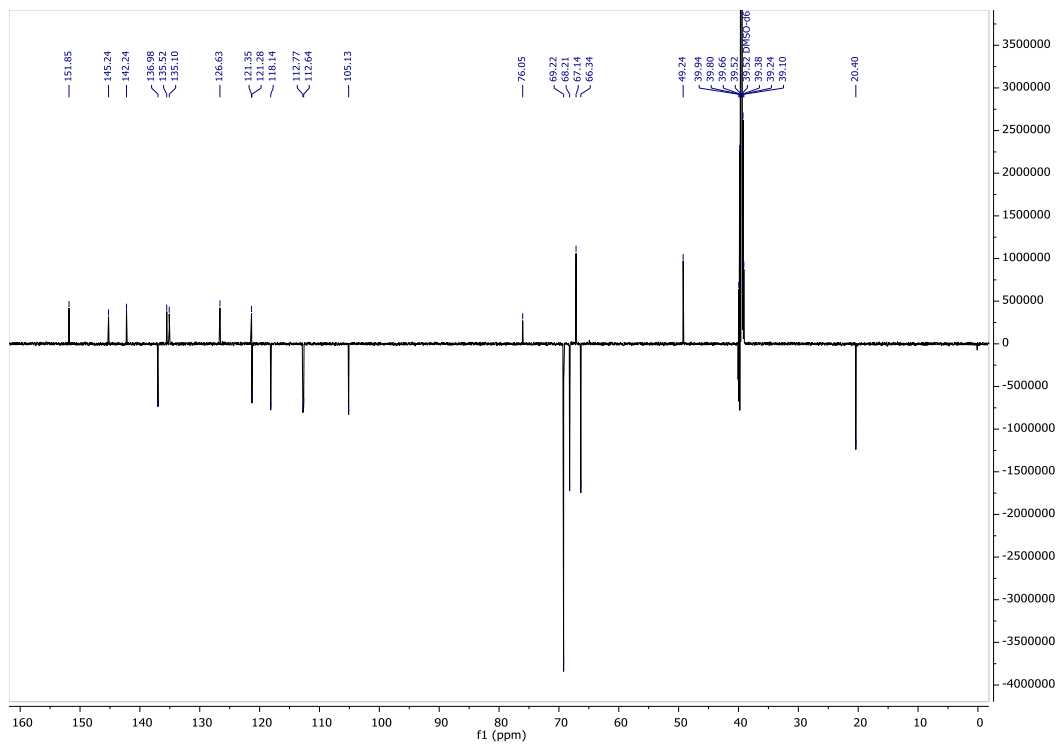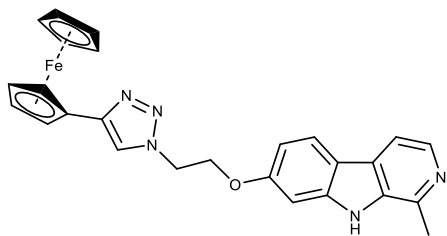

**23**

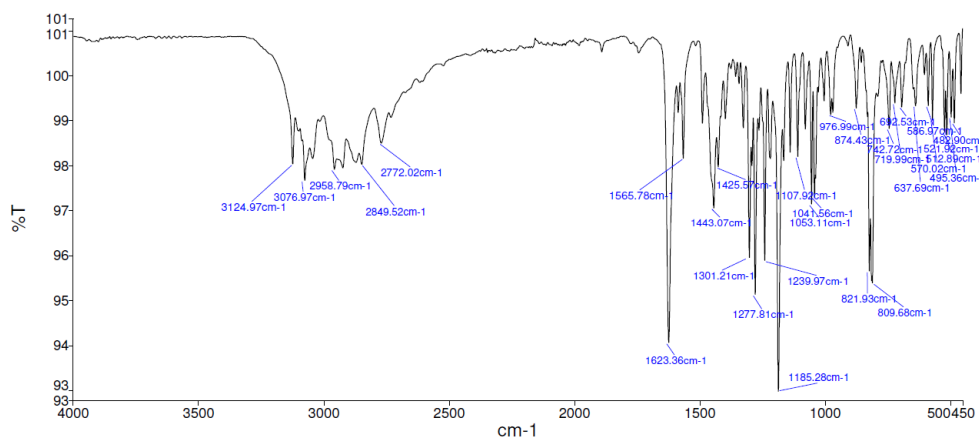

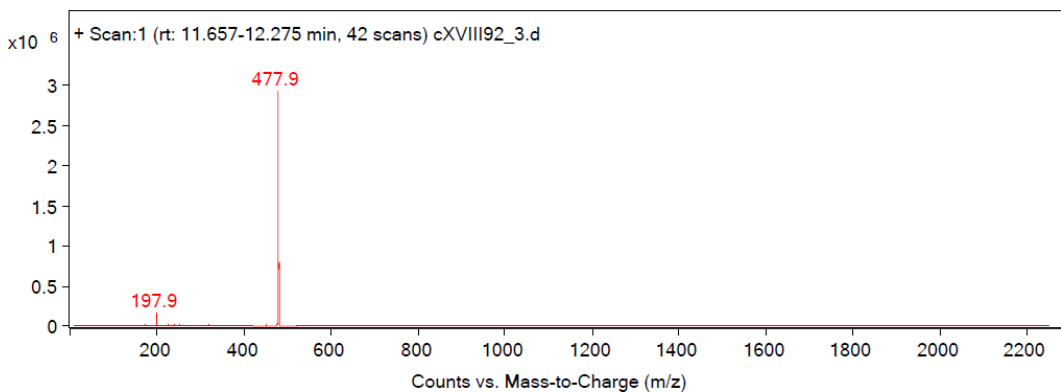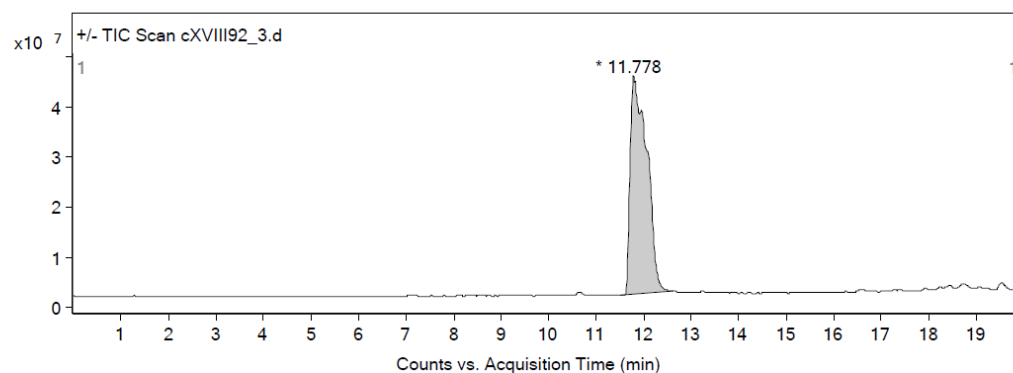

**Integration Peak List**

| Peak | Start  | RT     | End    | Height      | Area          | Area % |
|------|--------|--------|--------|-------------|---------------|--------|
| 1    | 11.521 | 11.778 | 12.621 | 43527887.01 | 1069966983.92 | 100    |

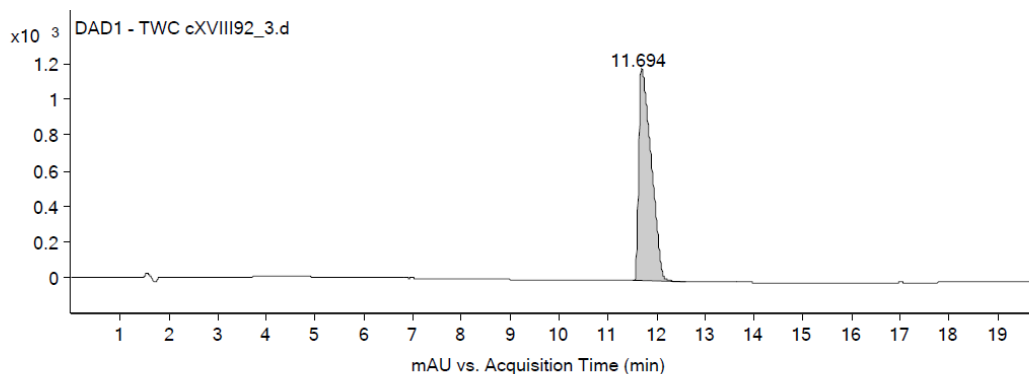

**Integration Peak List**

| Peak | Start  | RT     | End    | Height  | Area    | Area % |
|------|--------|--------|--------|---------|---------|--------|
| 1    | 11.527 | 11.694 | 12.601 | 1194.83 | 21125.4 | 100    |

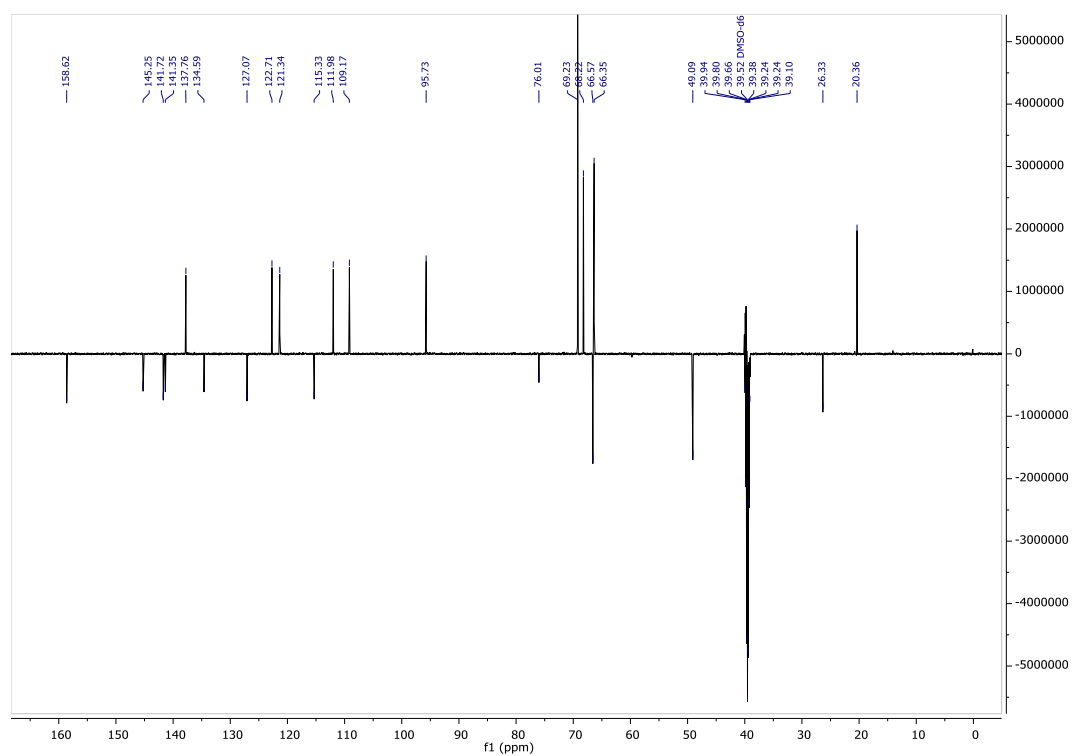

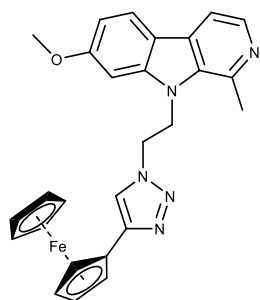

24

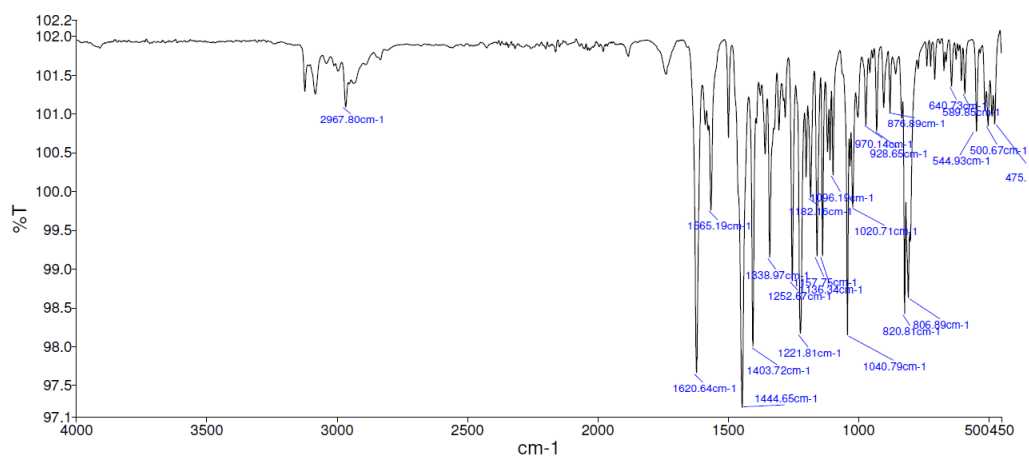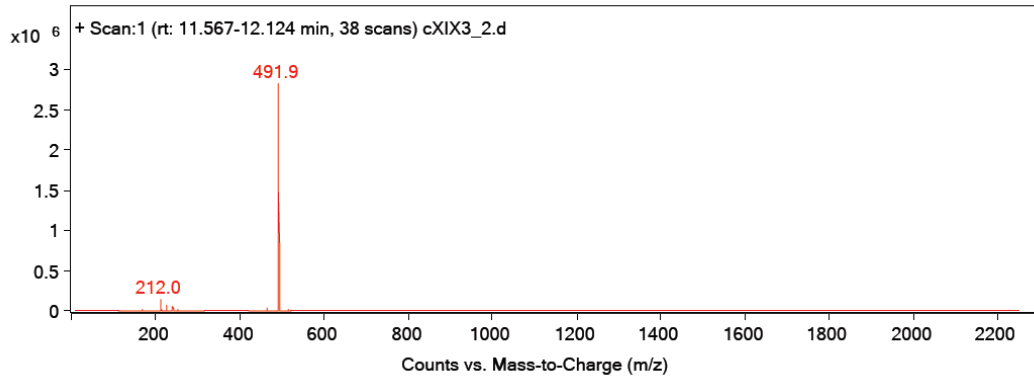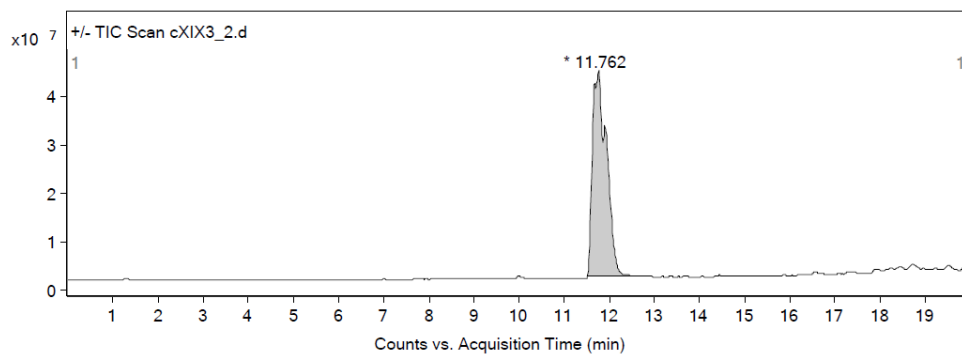

Integration Peak List

| Peak | Start  | RT     | End    | Height      | Area         | Area % |
|------|--------|--------|--------|-------------|--------------|--------|
| 1    | 11.521 | 11.762 | 12.456 | 42407508.75 | 919756502.02 | 100    |

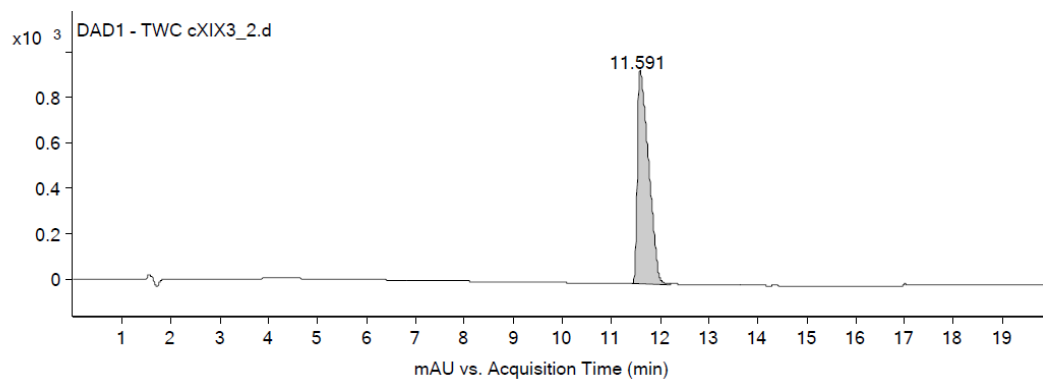

# Integration Peak List

| Peak | Start  | RT     | End    | Height | Area     | Area % |
|------|--------|--------|--------|--------|----------|--------|
| 1    | 11.431 | 11.591 | 12.218 | 933.81 | 14867.52 | 100    |

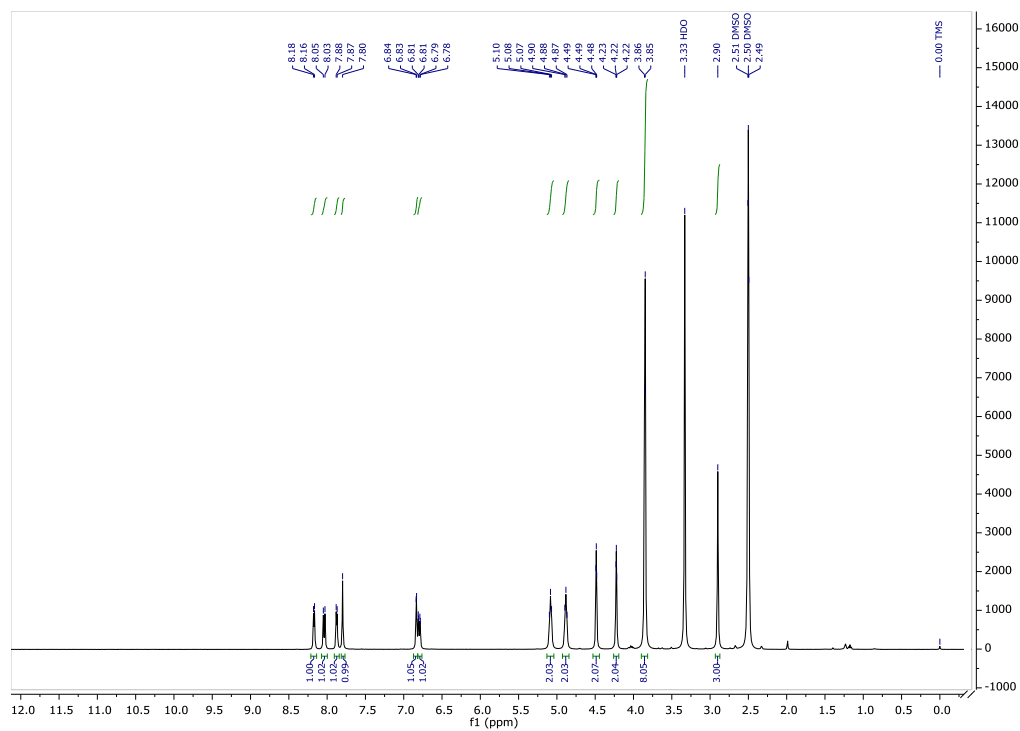

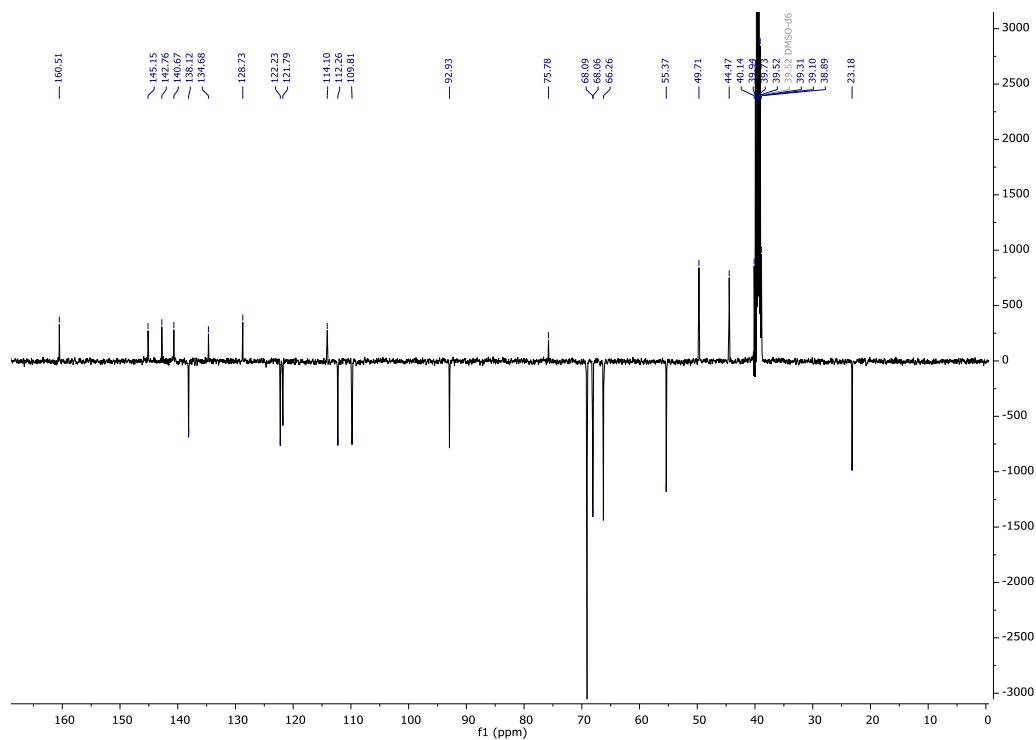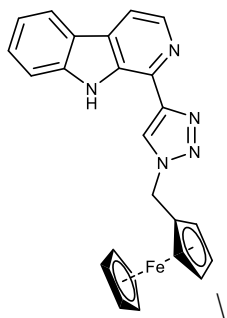

**25**

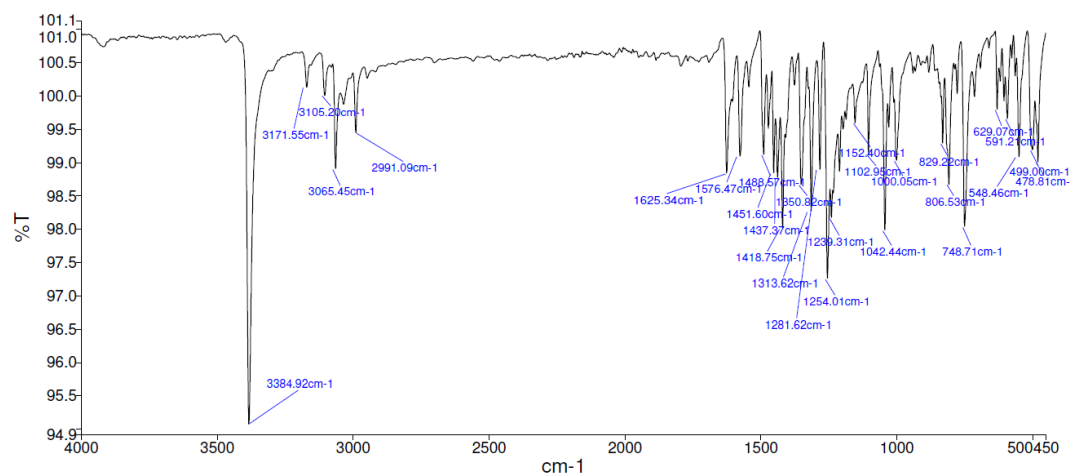

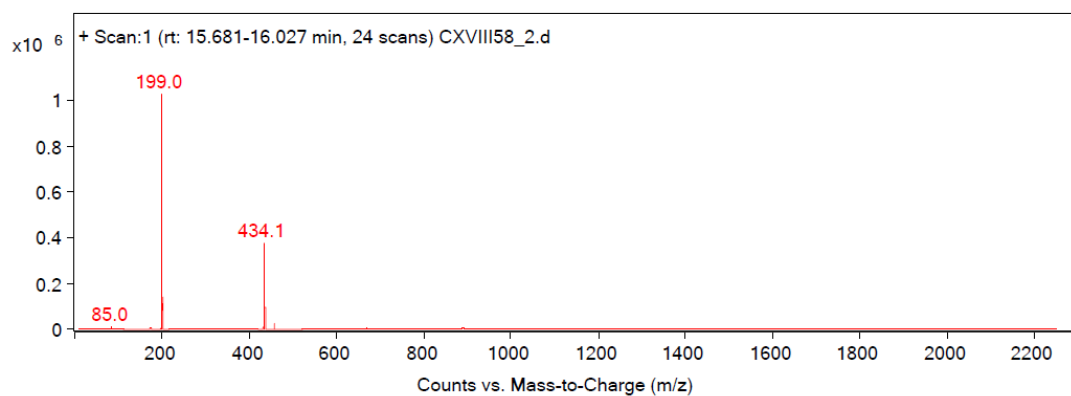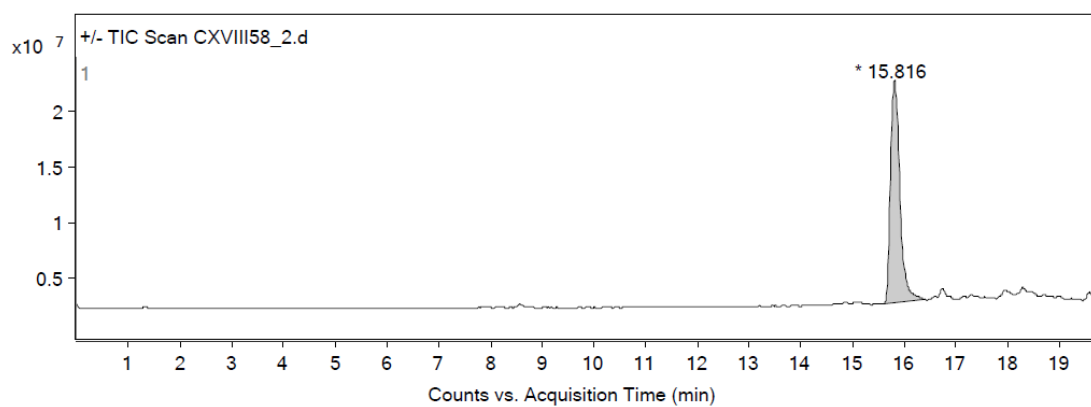

#### Integration Peak List

| Peak | Start  | RT     | End    | Height     | Area         | Area % |
|------|--------|--------|--------|------------|--------------|--------|
| 1    | 15.605 | 15.816 | 16.404 | 19997711.6 | 259614271.16 | 100    |

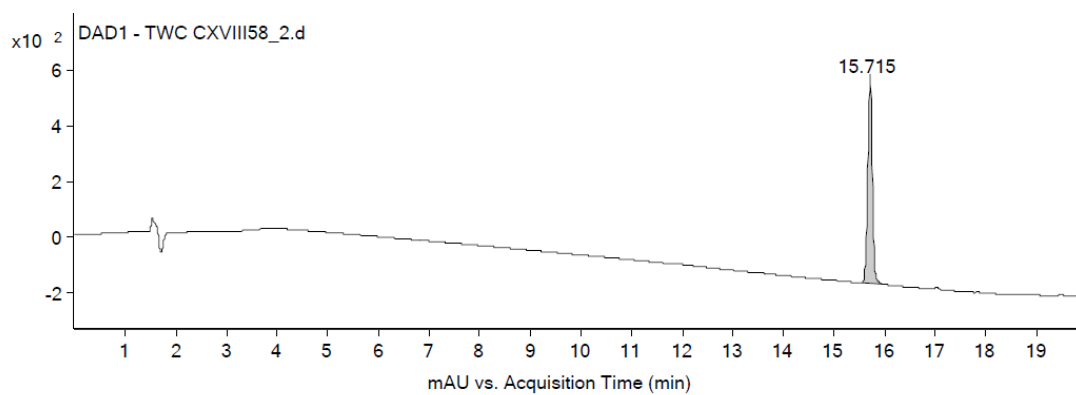

#### Integration Peak List

| Peak | Start  | RT     | End    | Height | Area    | Area % |
|------|--------|--------|--------|--------|---------|--------|
| 1    | 15.555 | 15.715 | 16.002 | 747.4  | 4724.58 | 100    |

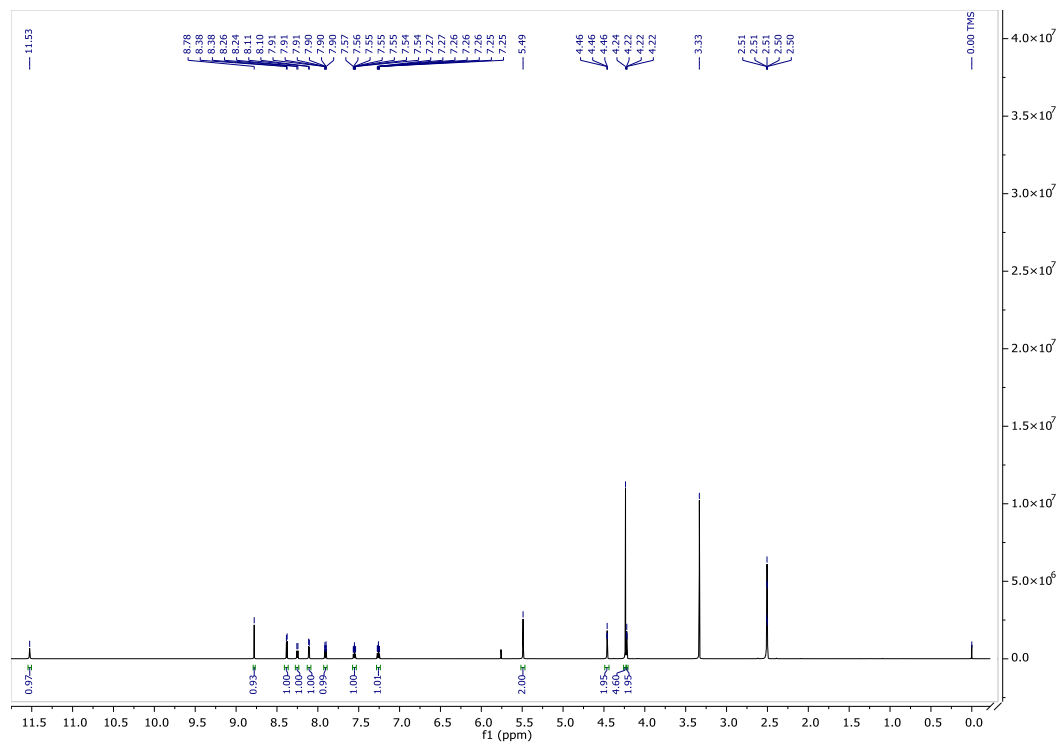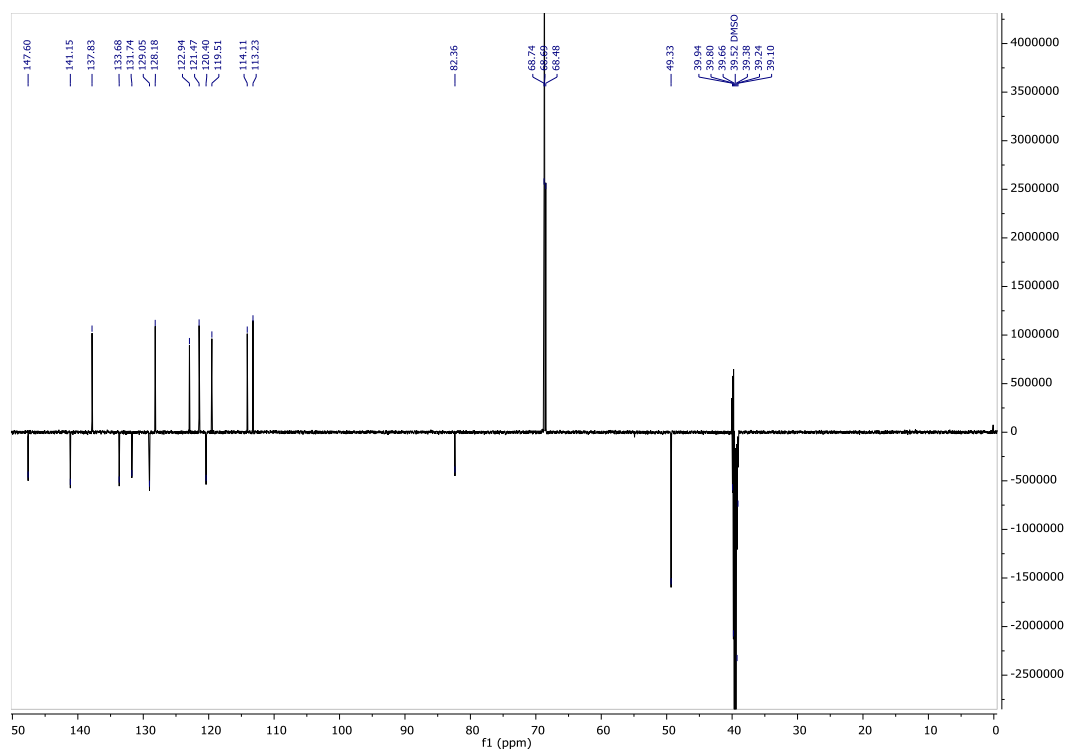



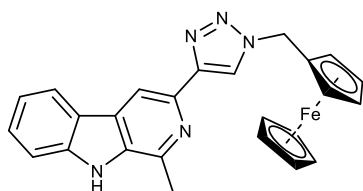

26

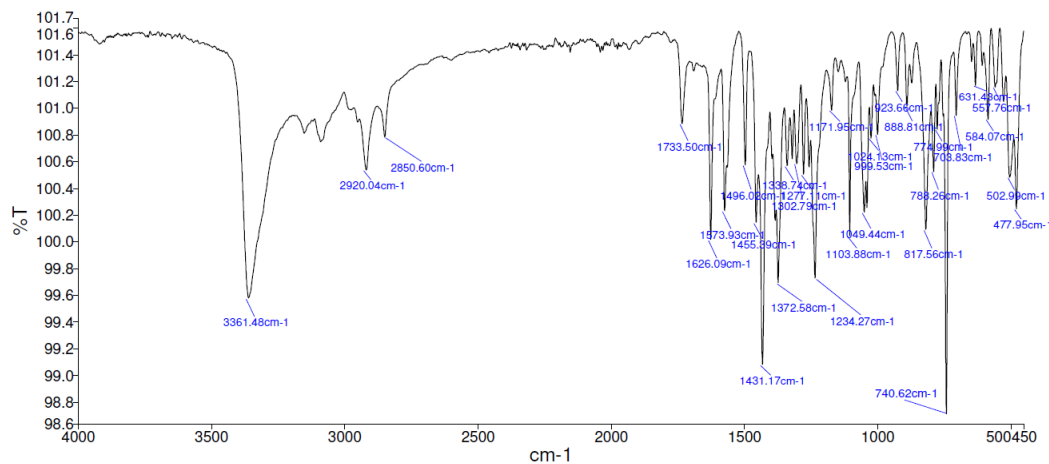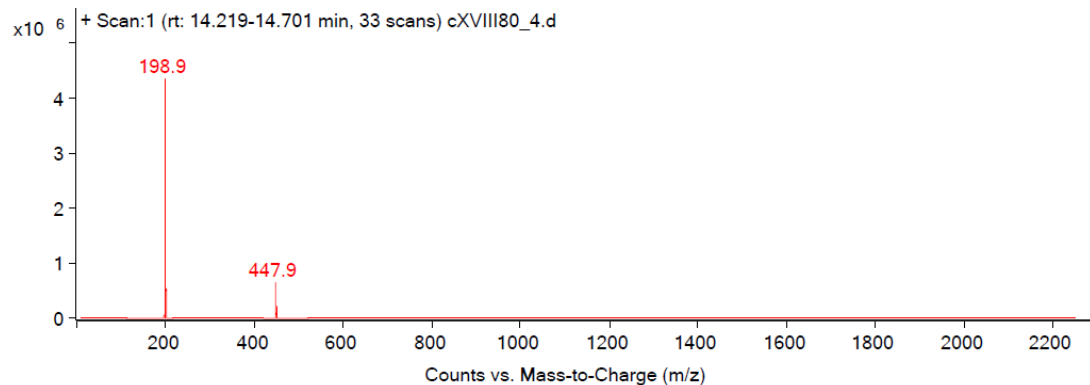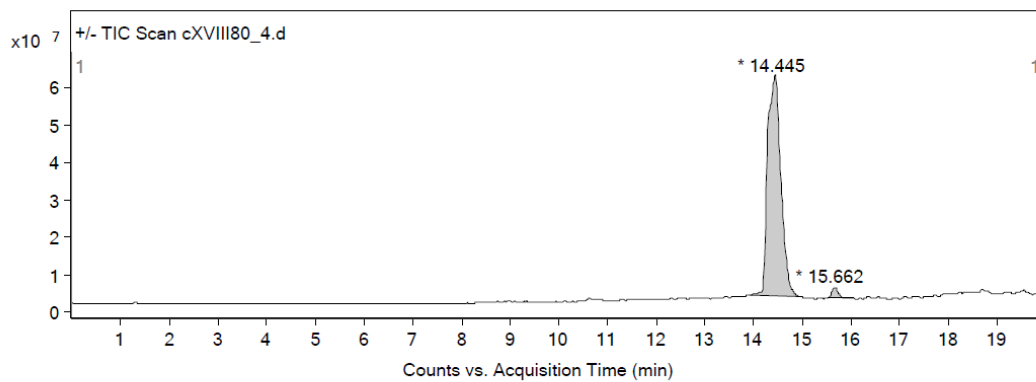

Integration Peak List

| Peak | Start  | RT     | End    | Height      | Area          | Area % |
|------|--------|--------|--------|-------------|---------------|--------|
| 1    | 13.918 | 14.445 | 14.957 | 59020670.24 | 1134308297.78 | 100    |
| 2    | 15.545 | 15.662 | 16.057 | 2695116.31  | 25830575.15   | 2.28   |

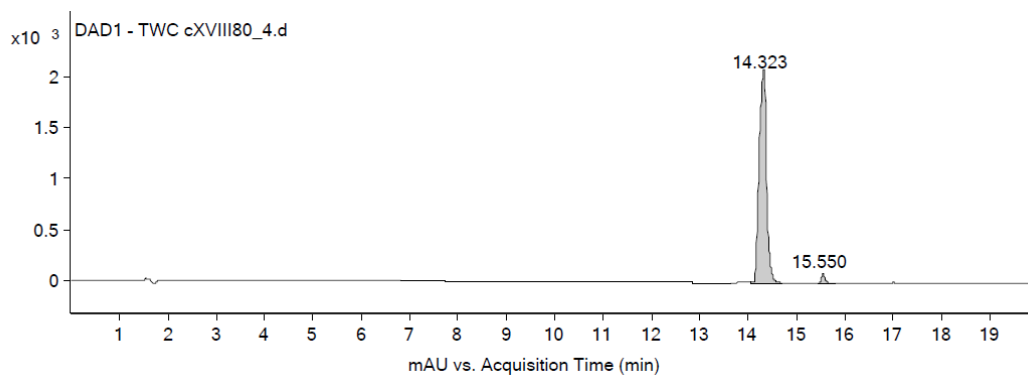

**Integration Peak List**

| Peak | Start  | RT     | End    | Height | Area     | Area % |
|------|--------|--------|--------|--------|----------|--------|
| 1    | 14.036 | 14.323 | 14.69  | 2083.3 | 22246.88 | 100    |
| 2    | 15.445 | 15.55  | 15.796 | 96.9   | 477.93   | 2.15   |

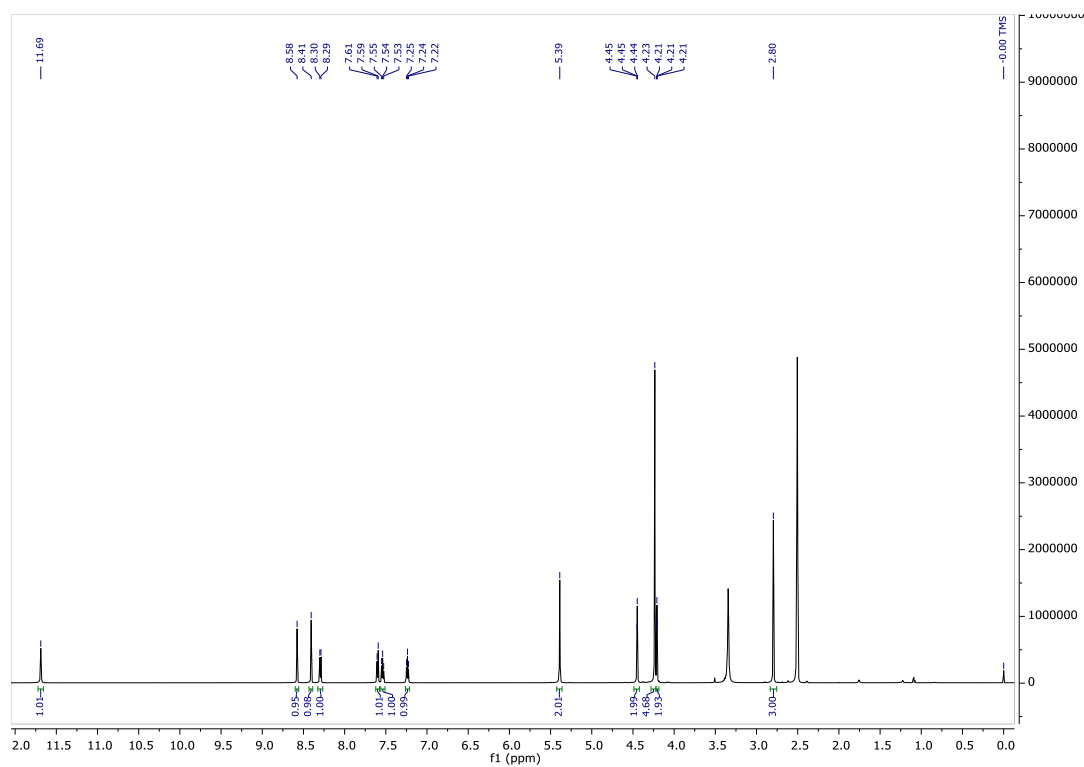

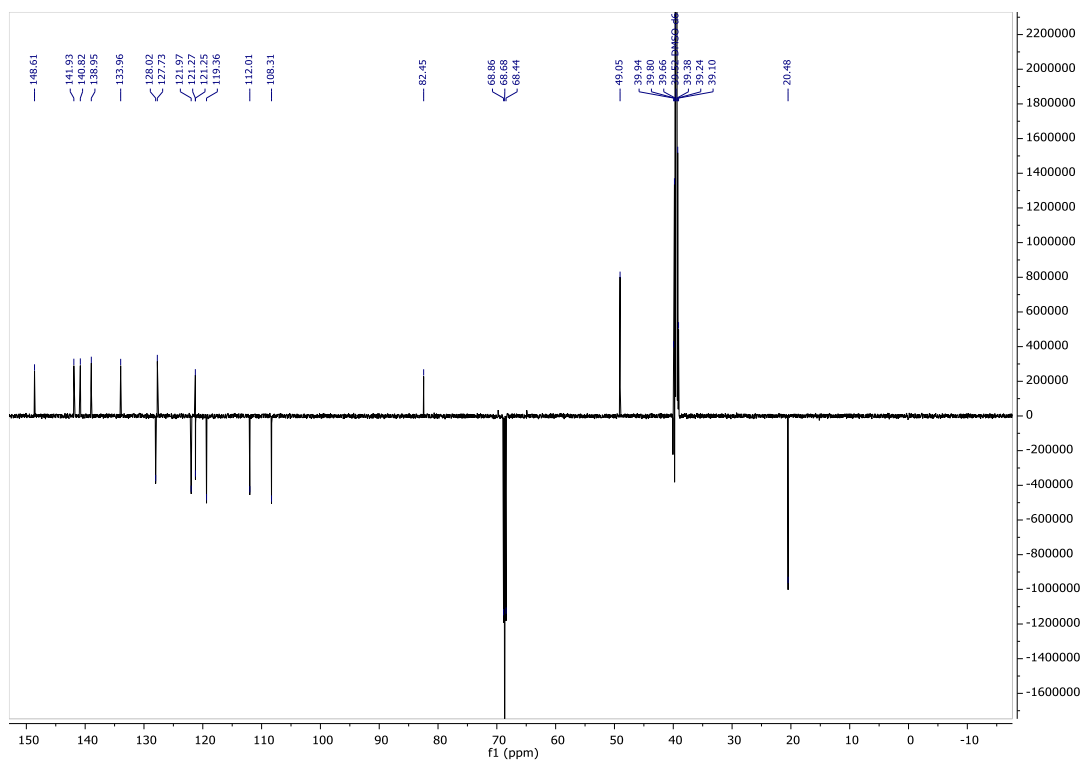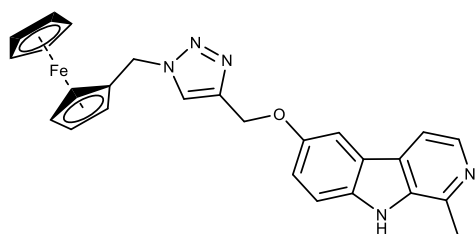

27

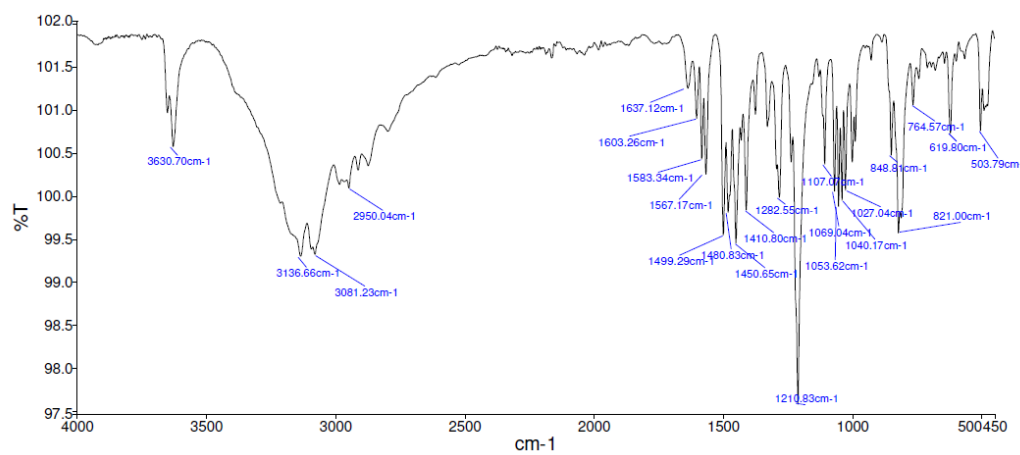

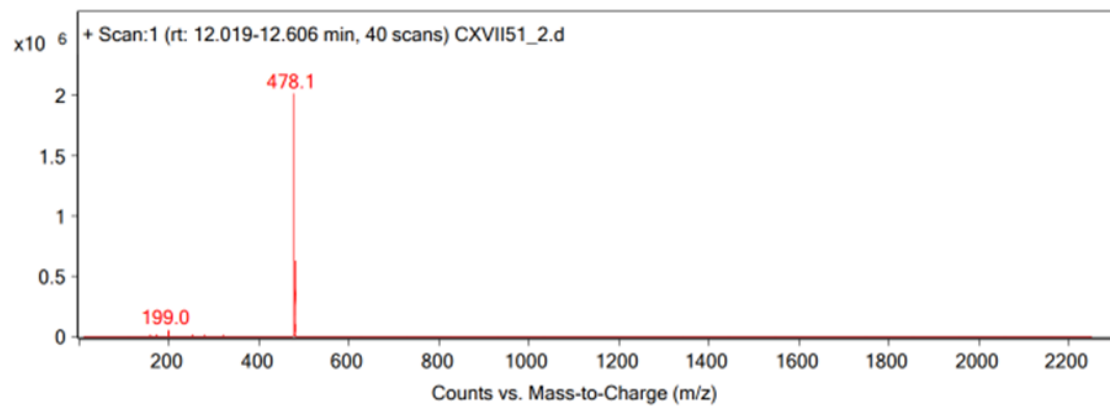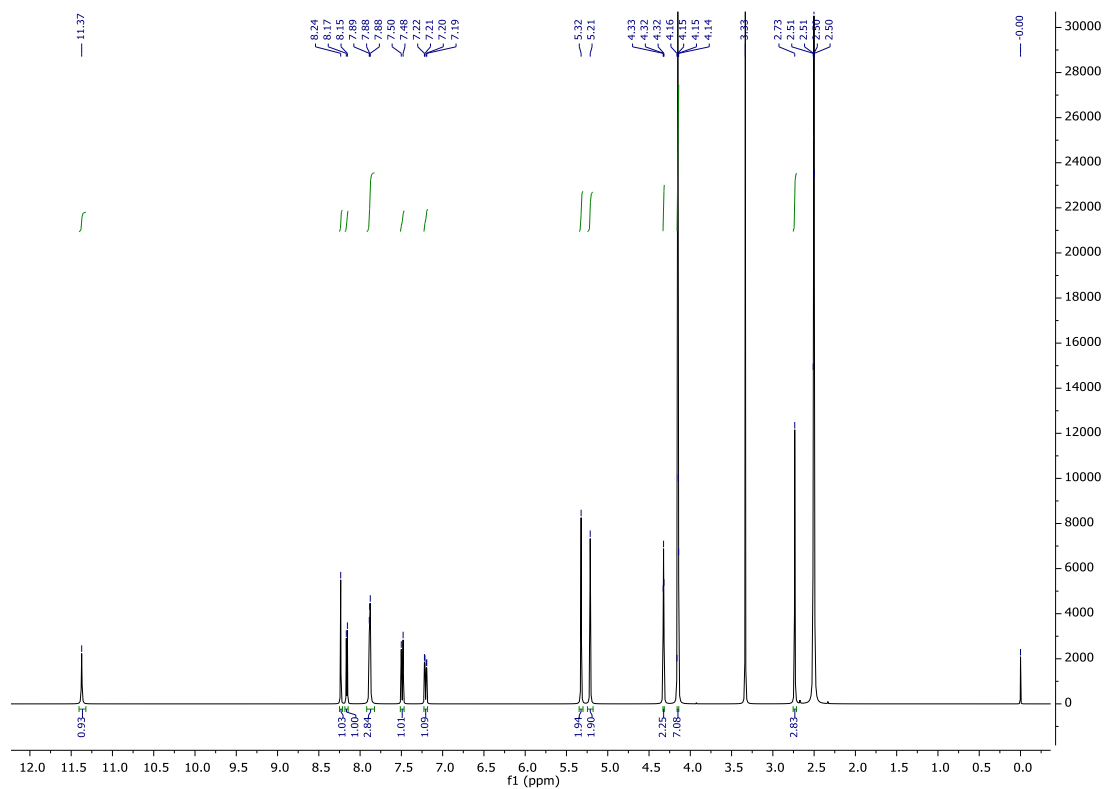

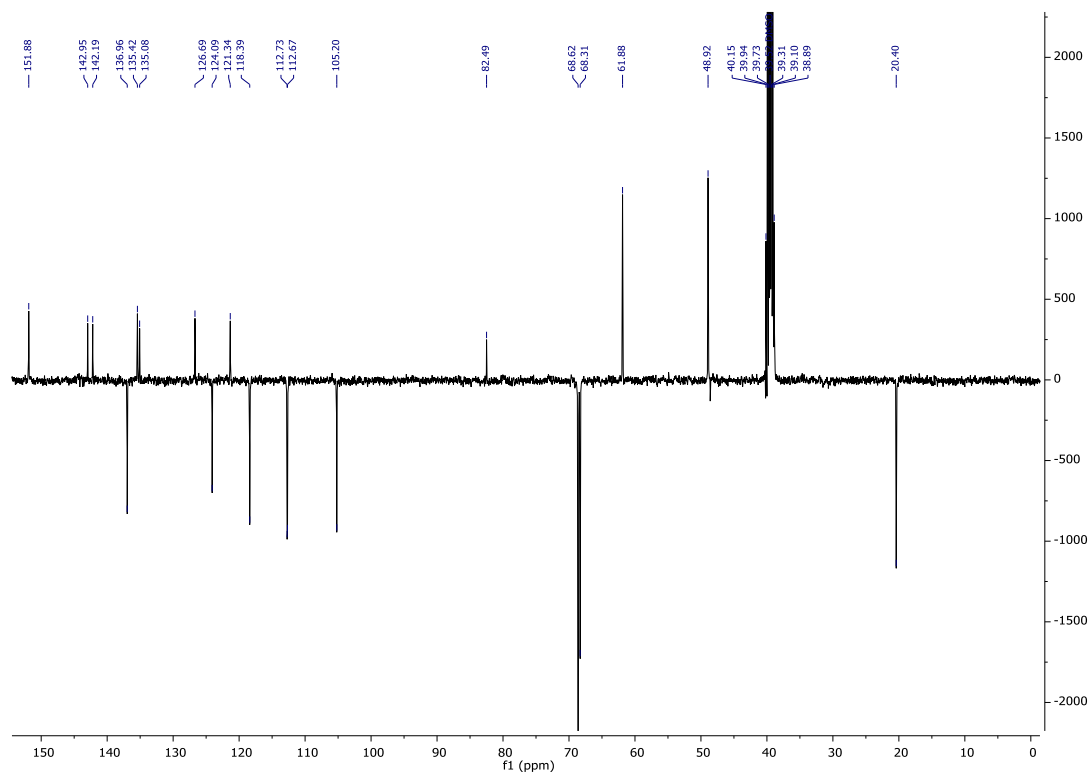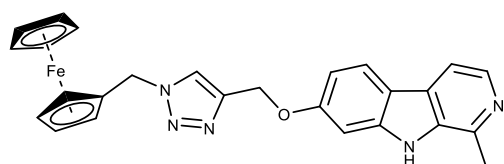

**28**

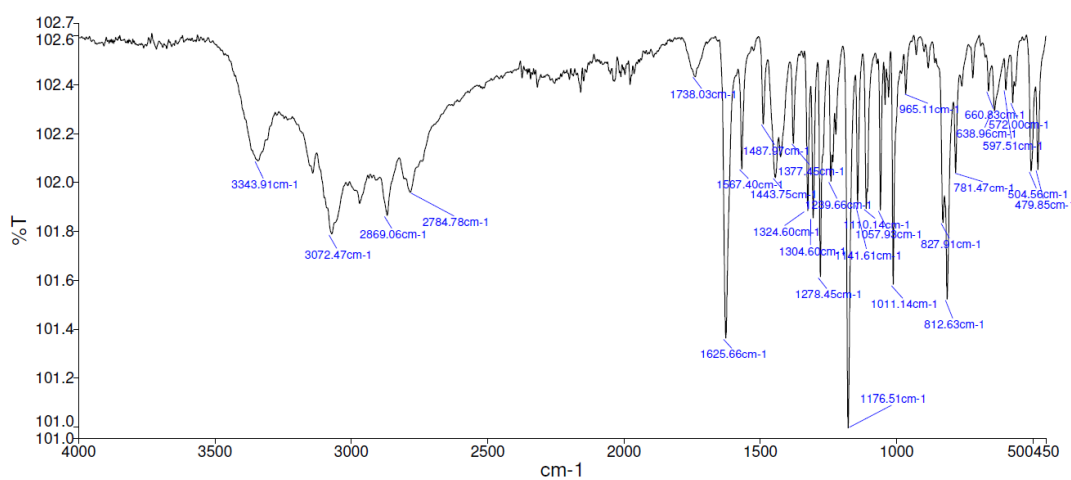

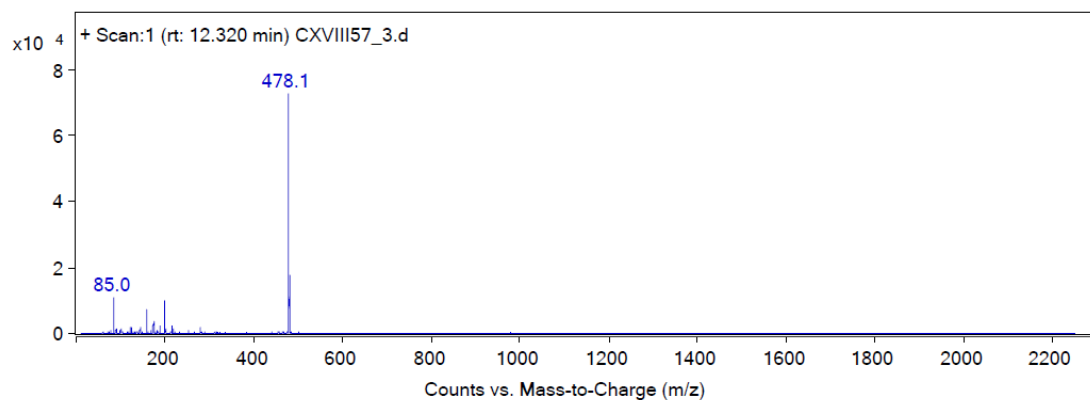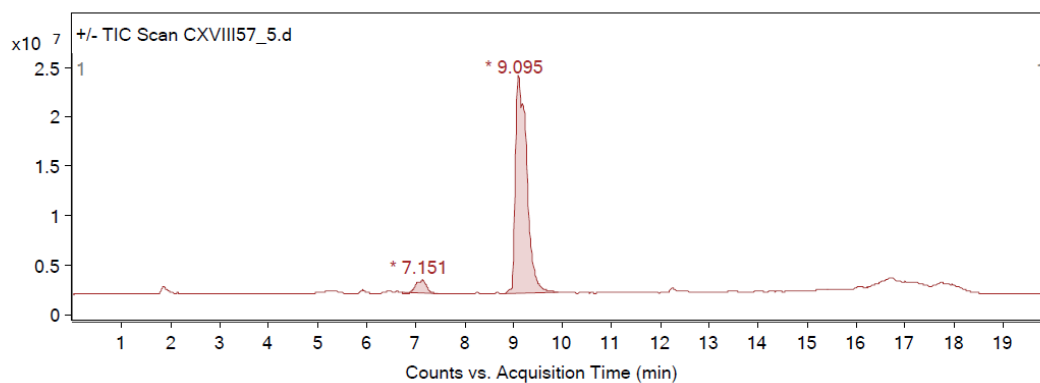

**Integration Peak List**

| Peak | Start | RT    | End   | Height      | Area         | Area % |
|------|-------|-------|-------|-------------|--------------|--------|
| 1    | 6.729 | 7.151 | 7.483 | 1334525.72  | 19487940.07  | 5.34   |
| 2    | 8.794 | 9.095 | 9.909 | 21941635.24 | 364759531.81 | 100    |

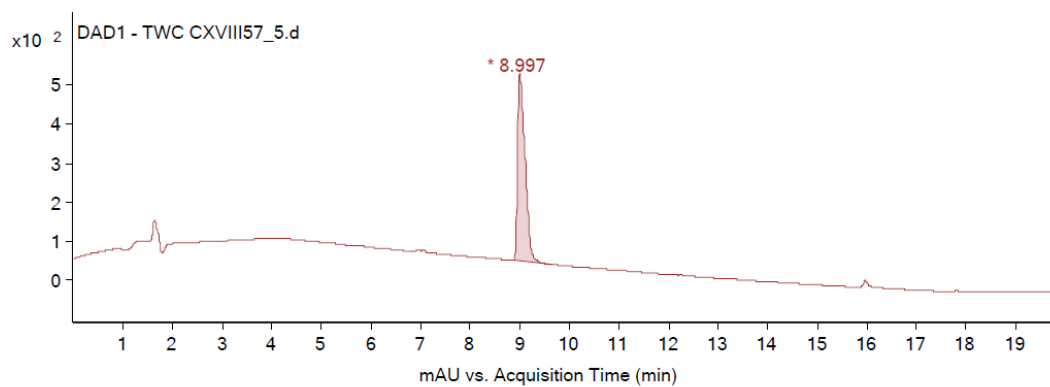

**Integration Peak List**

| Peak | Start | RT    | End   | Height | Area    | Area % |
|------|-------|-------|-------|--------|---------|--------|
| 1    | 8.864 | 8.997 | 9.644 | 479.79 | 5004.85 | 100    |

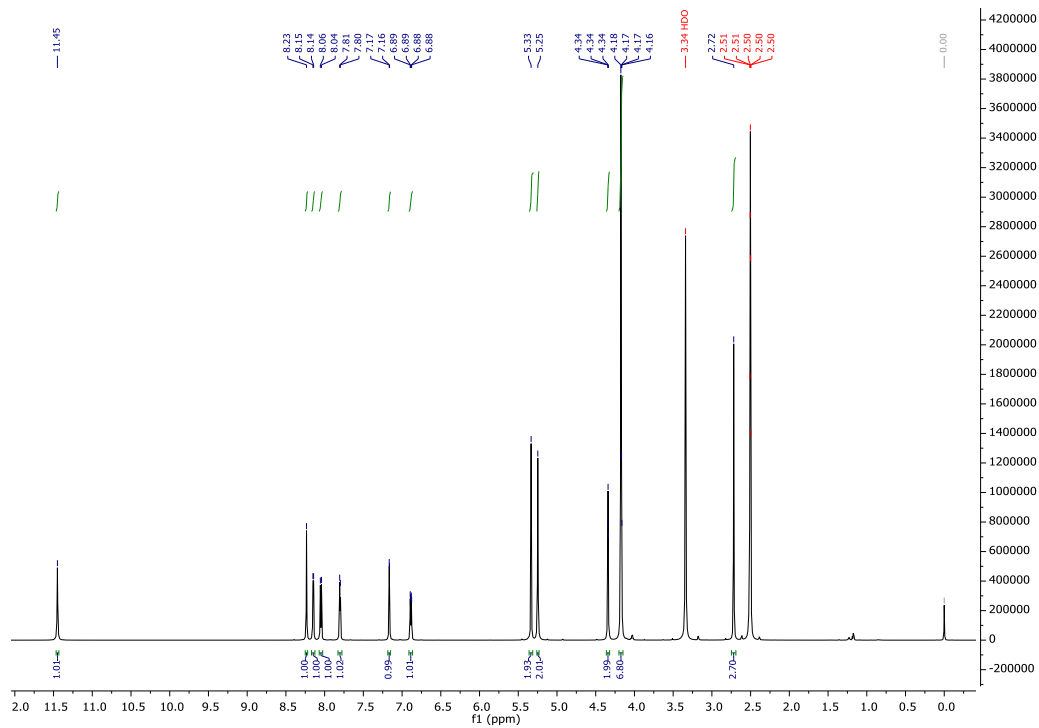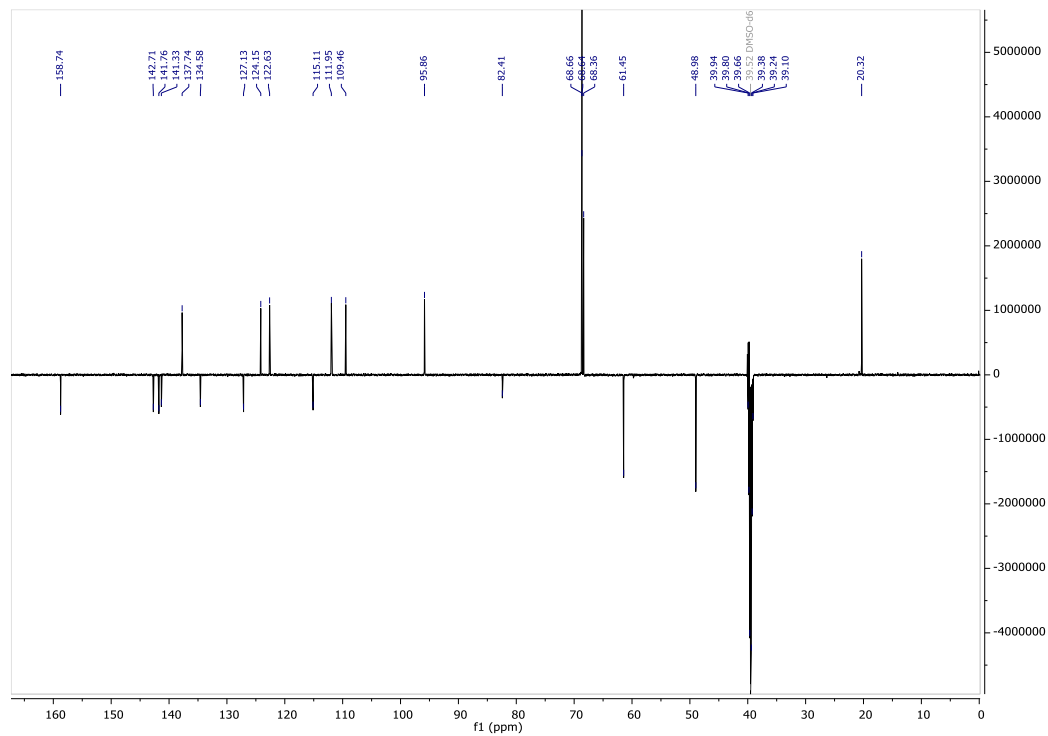

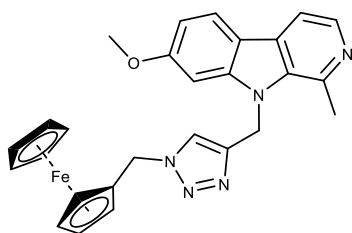

**29**

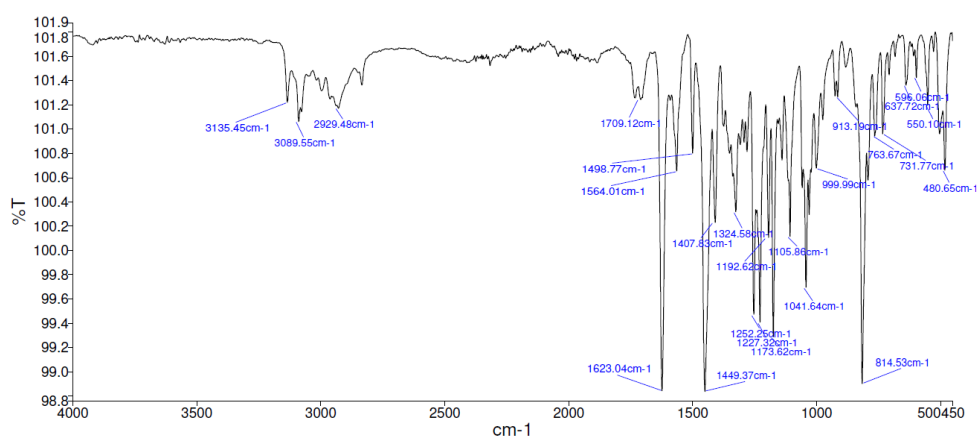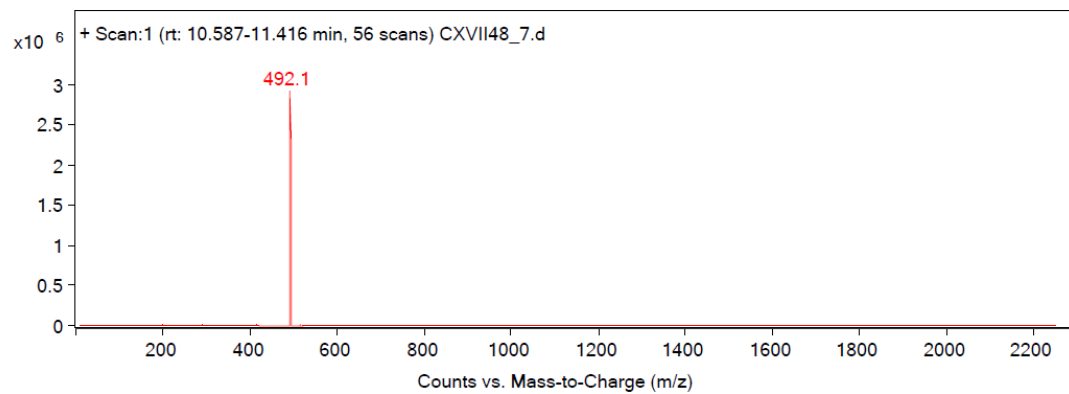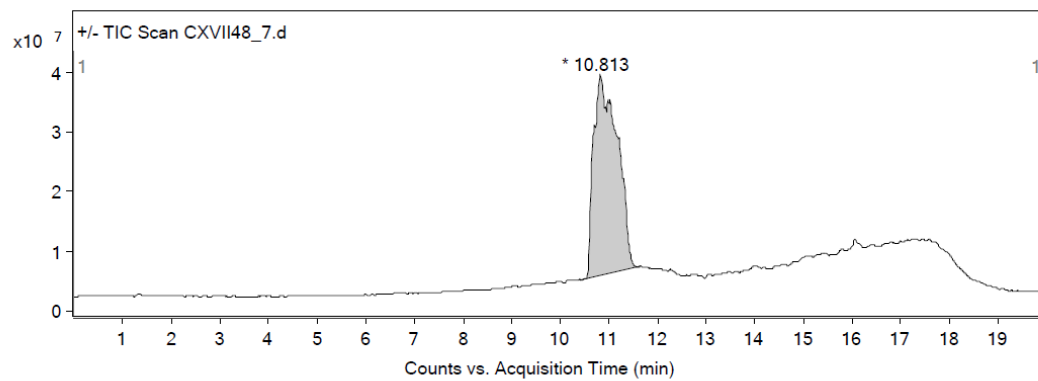

**Integration Peak List**

| Peak | Start  | RT     | End    | Height      | Area          | Area % |
|------|--------|--------|--------|-------------|---------------|--------|
| 1    | 10.406 | 10.813 | 11.642 | 33720931.72 | 1130409678.26 | 100    |



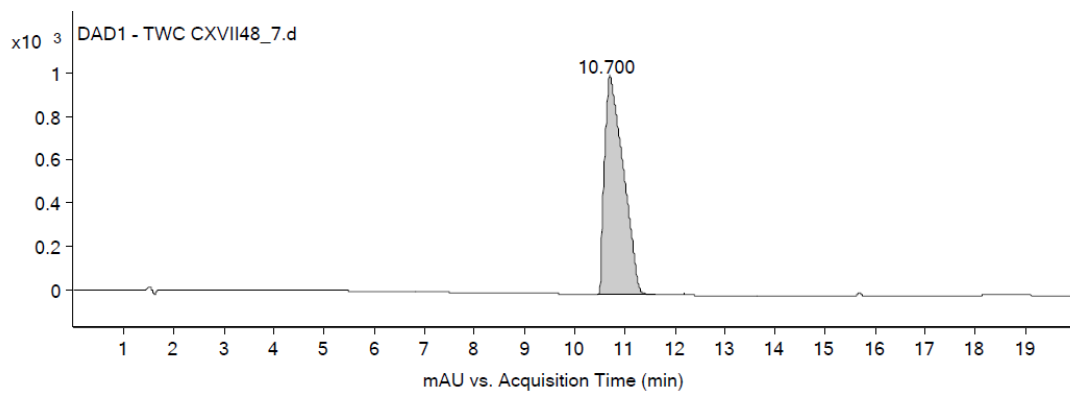

# Integration Peak List

| Peak | Start  | RT   | End    | Height  | Area     | Area % |
|------|--------|------|--------|---------|----------|--------|
| 1    | 10.466 | 10.7 | 11.606 | 1011.94 | 26136.72 | 100    |

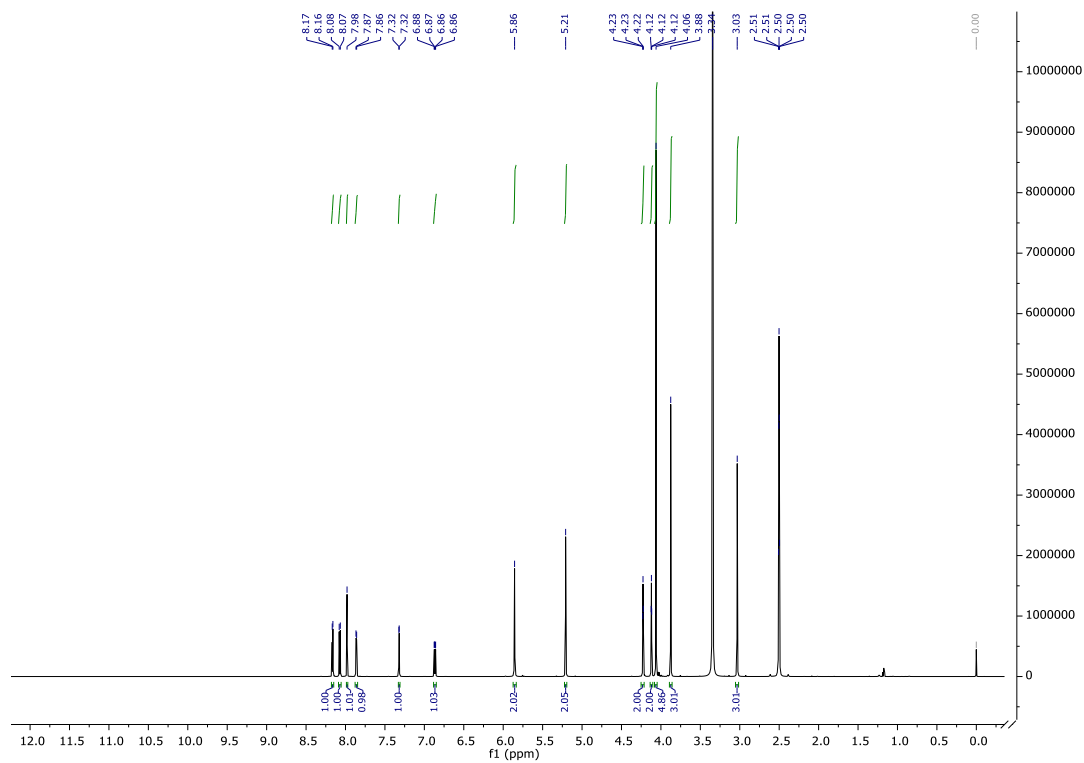

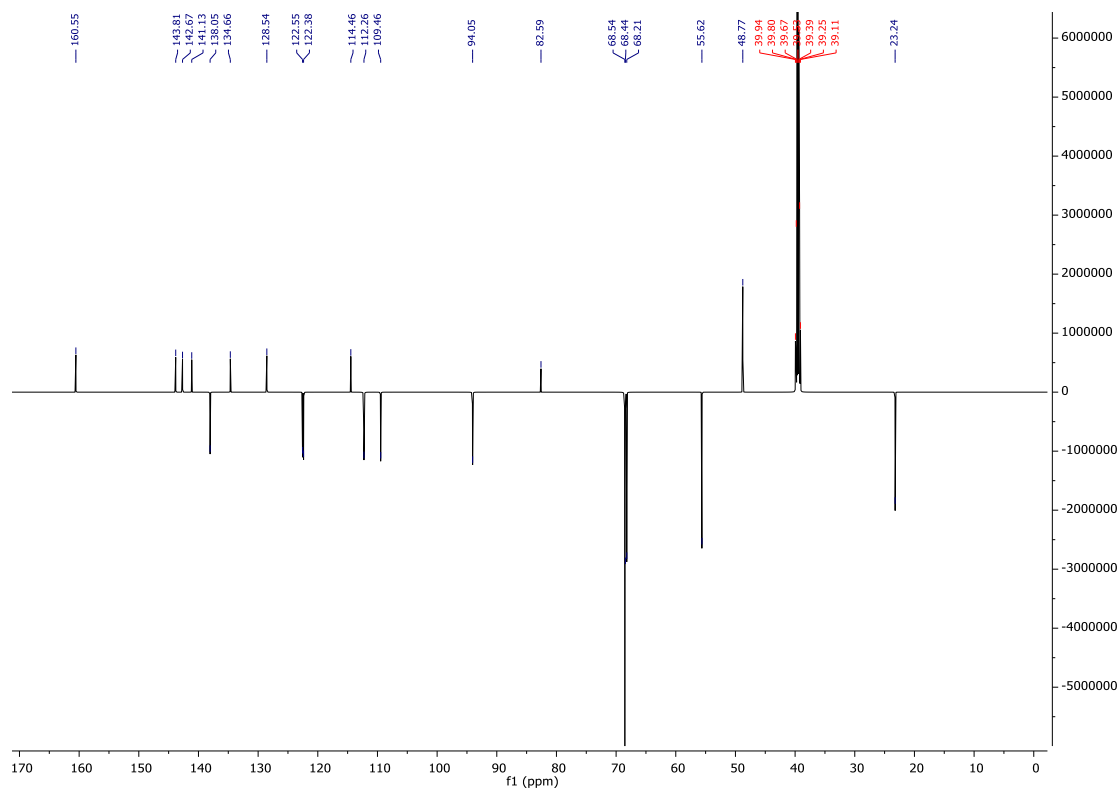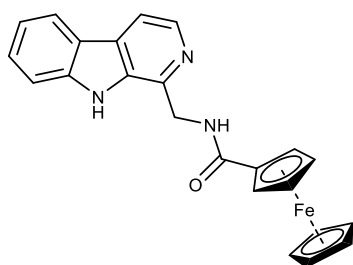

**30**

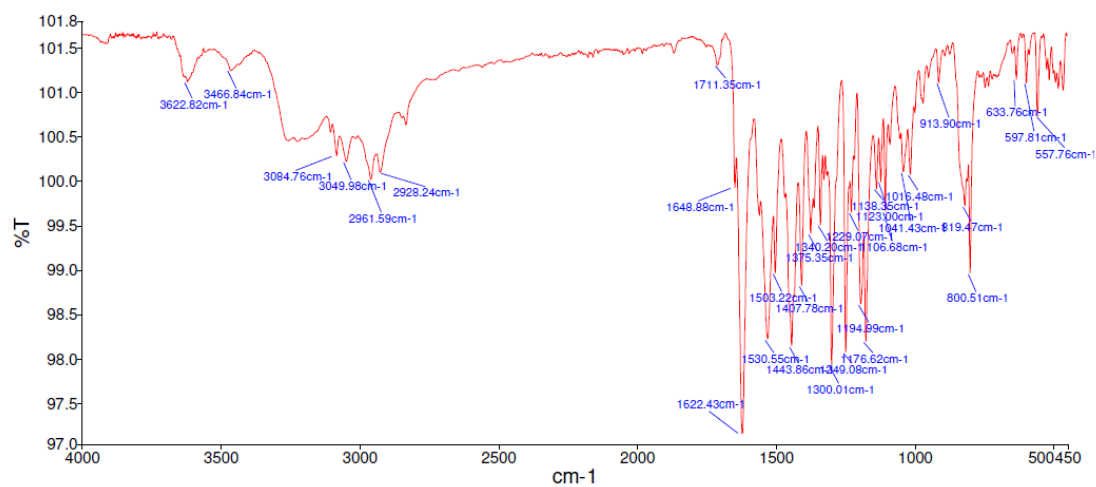

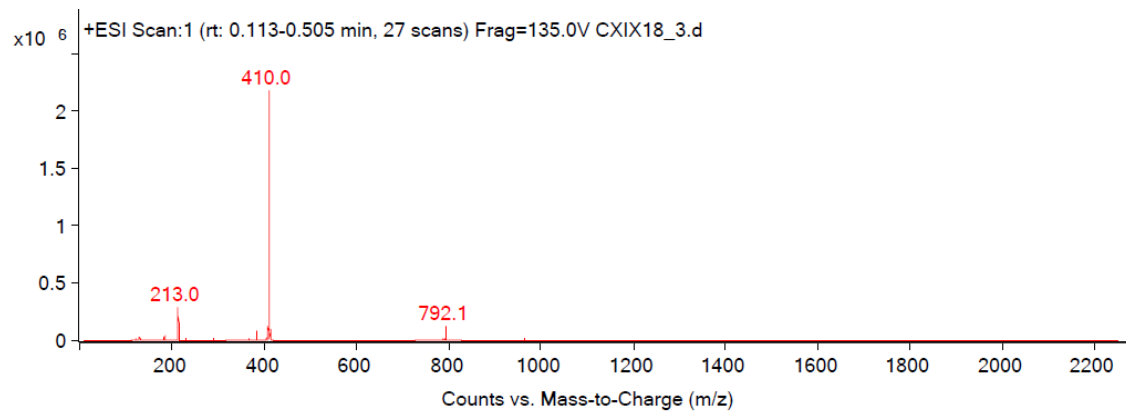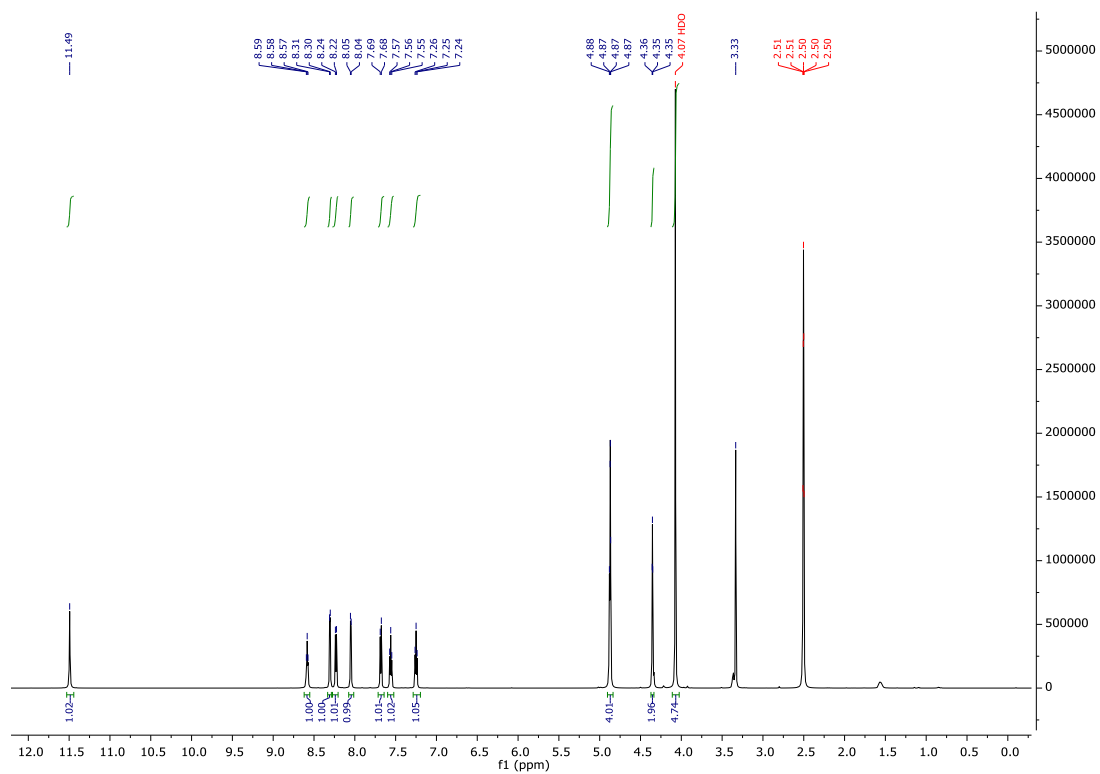

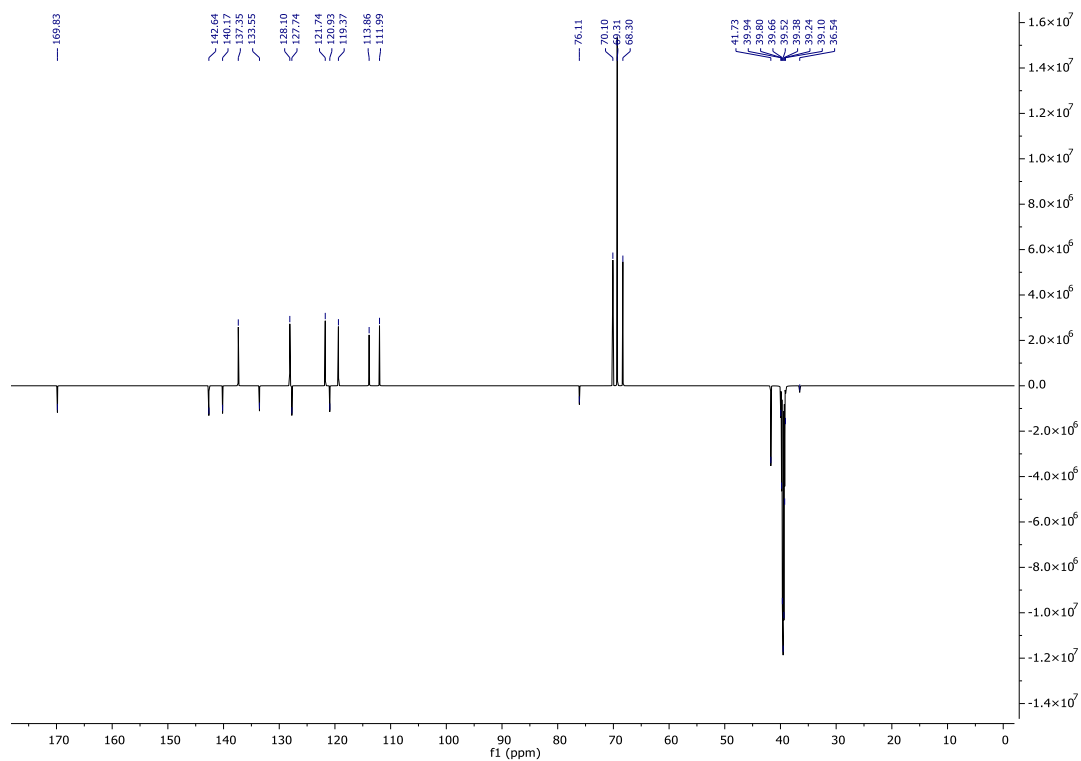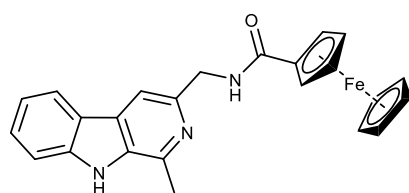

**31**

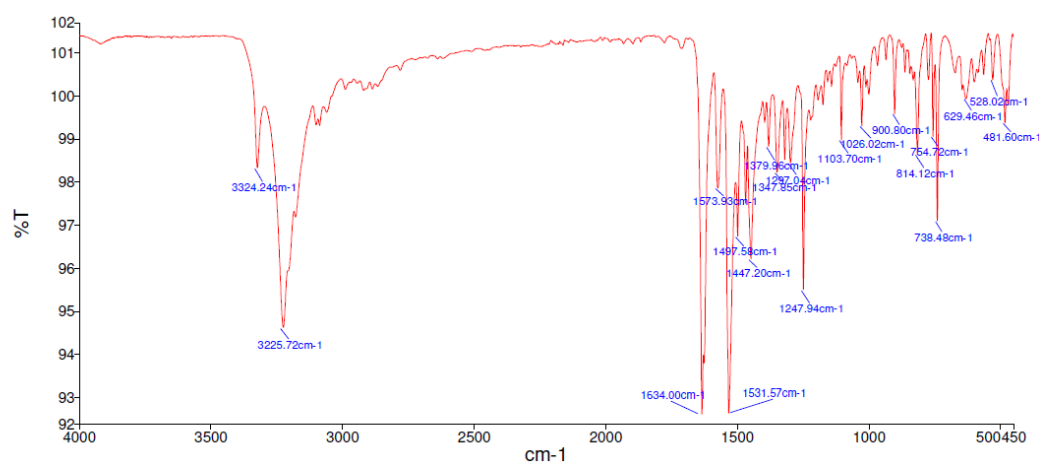

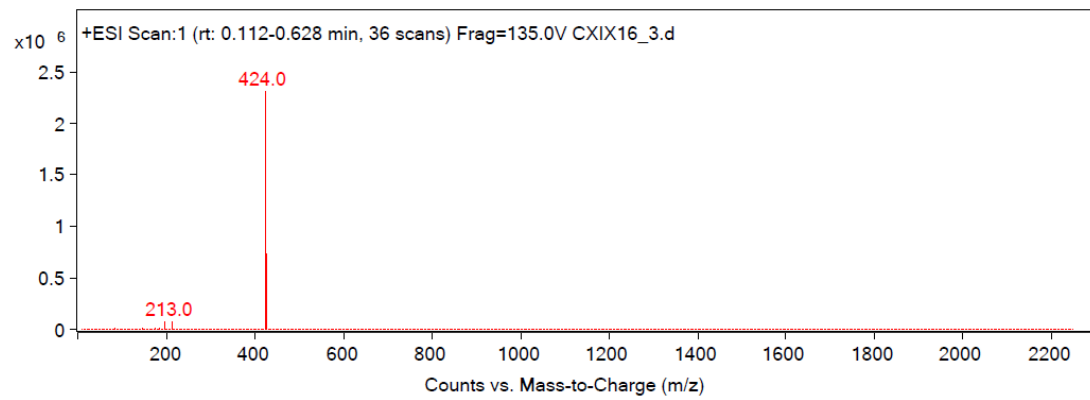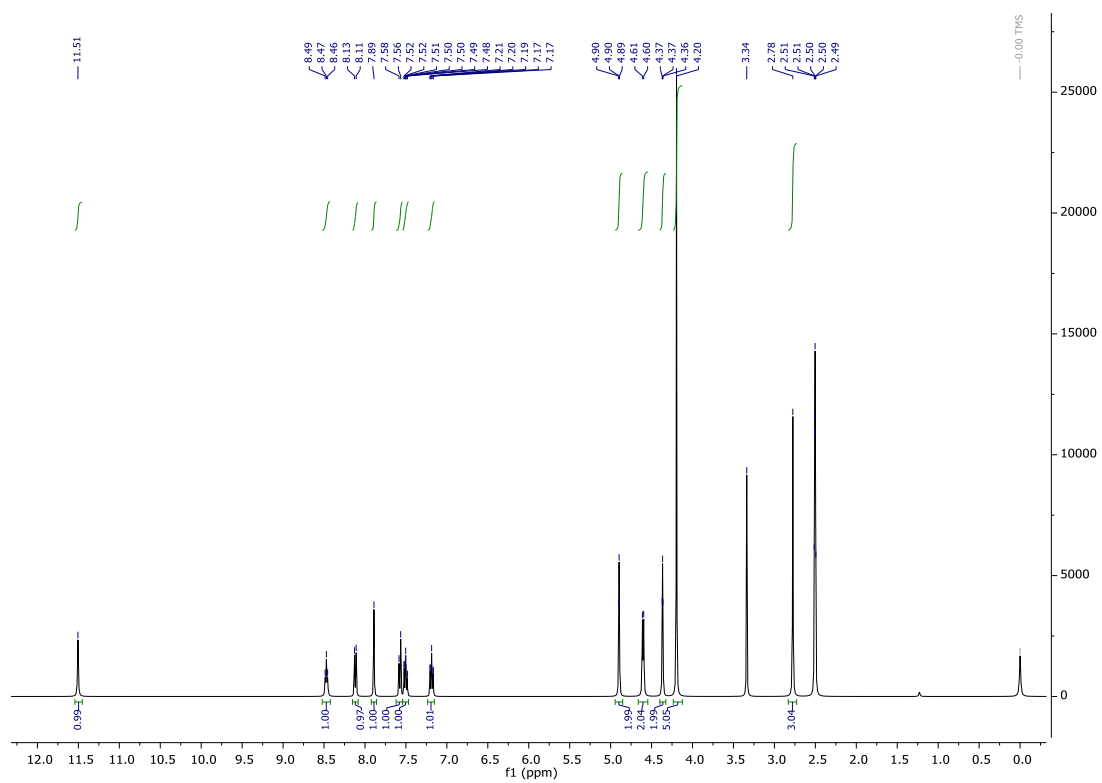

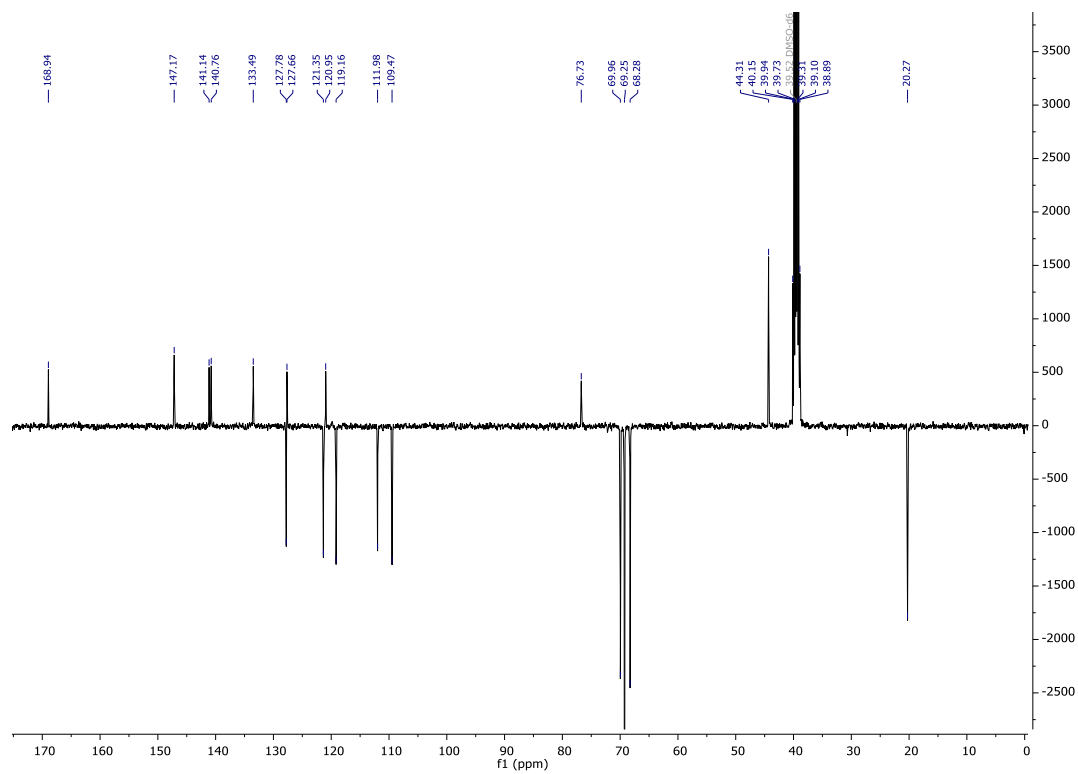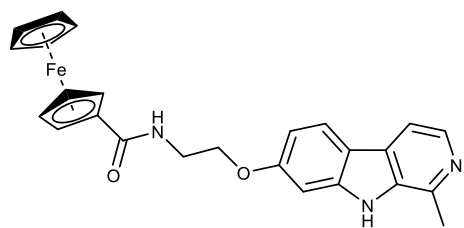

**32**

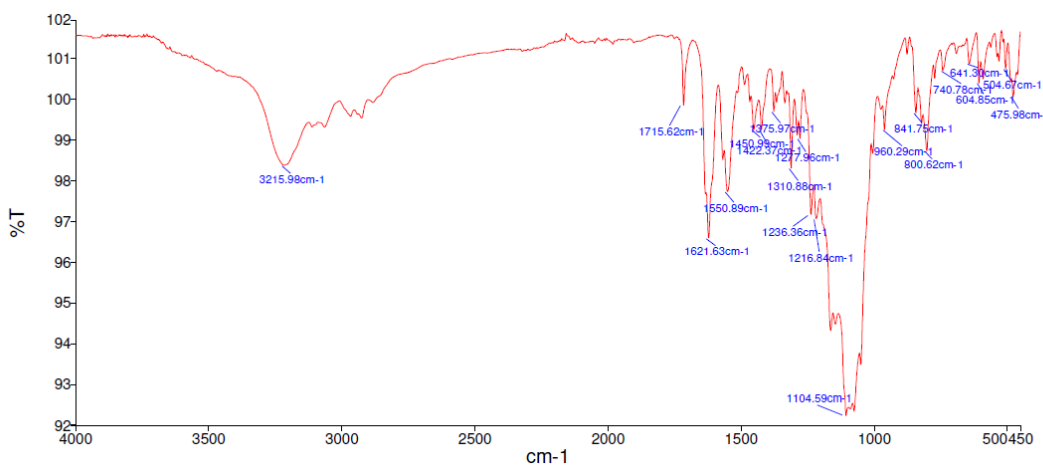

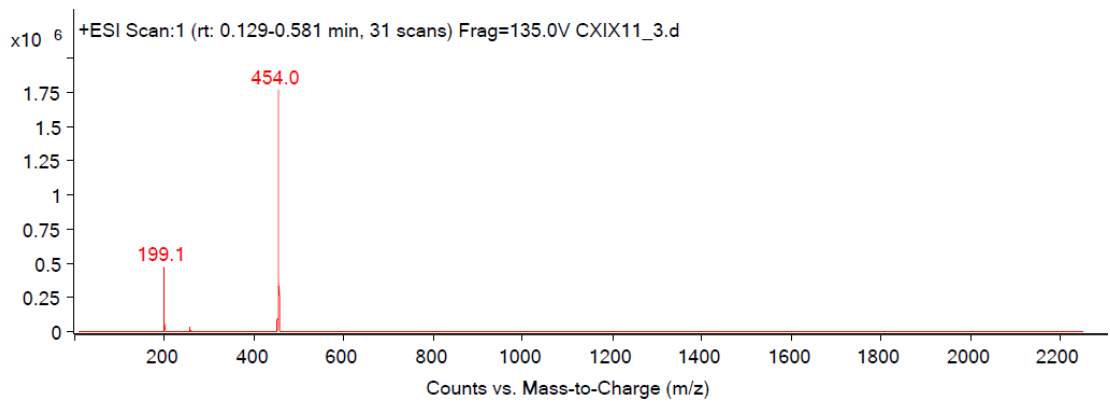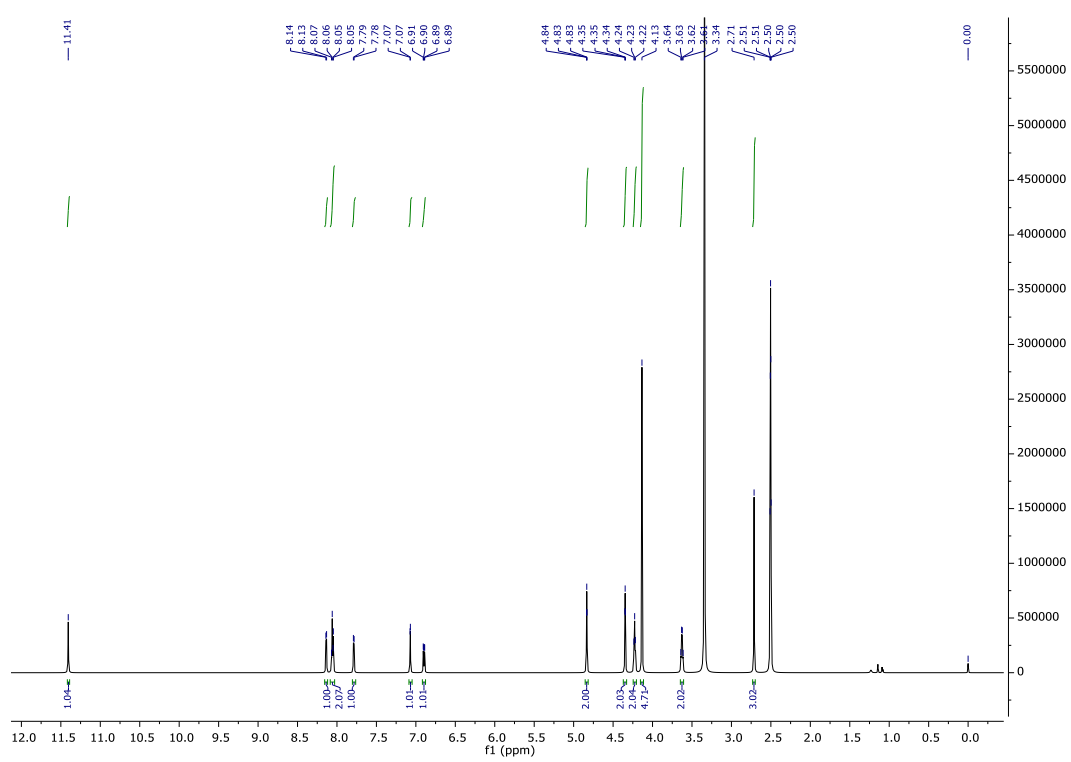

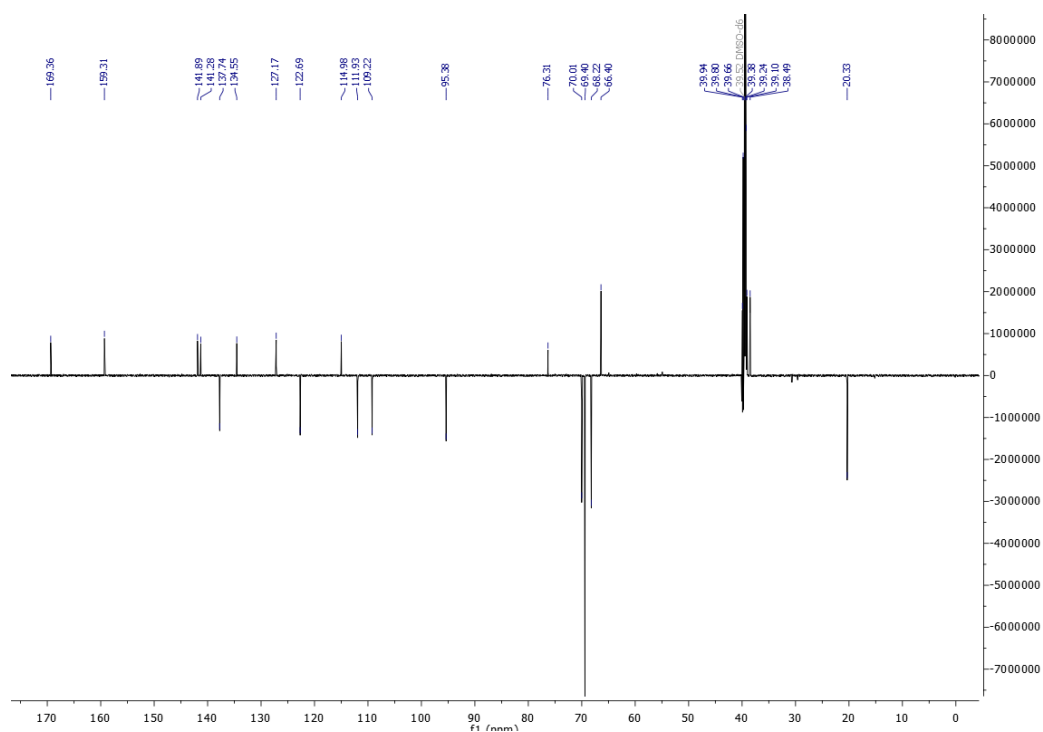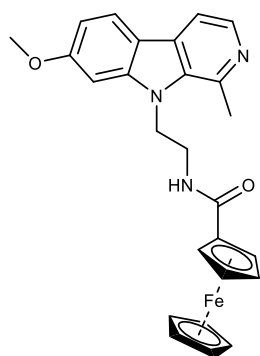

33

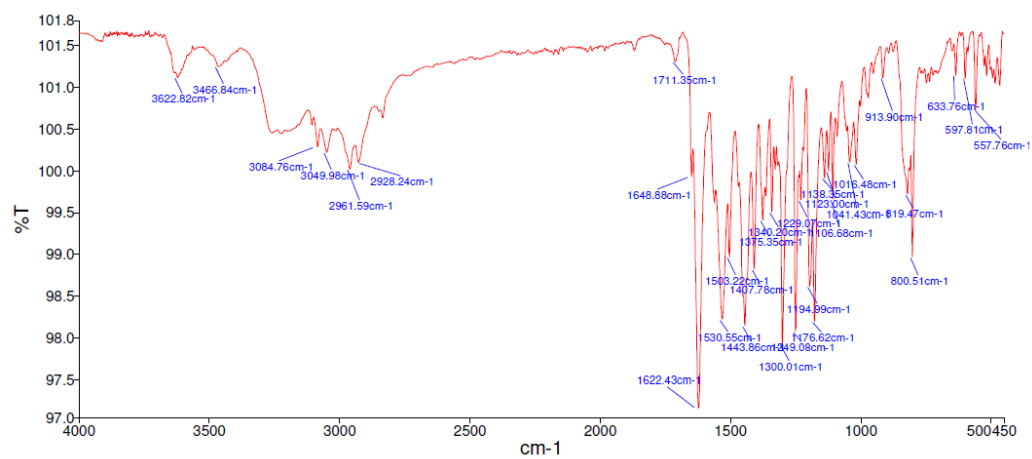



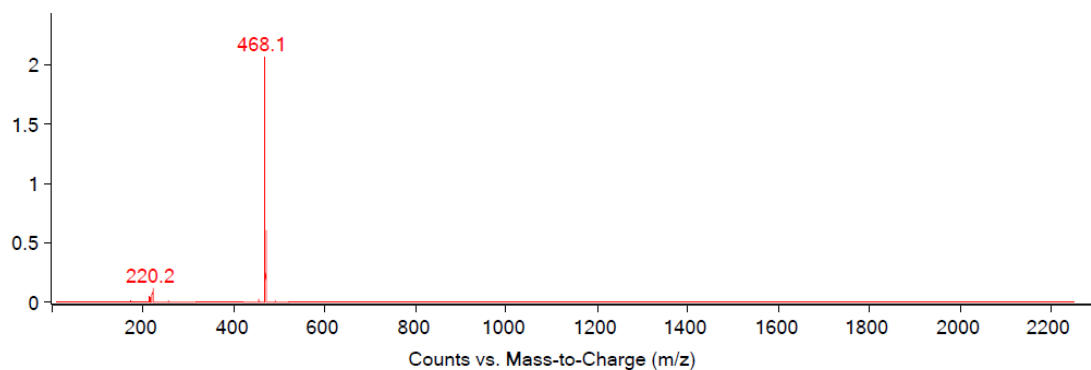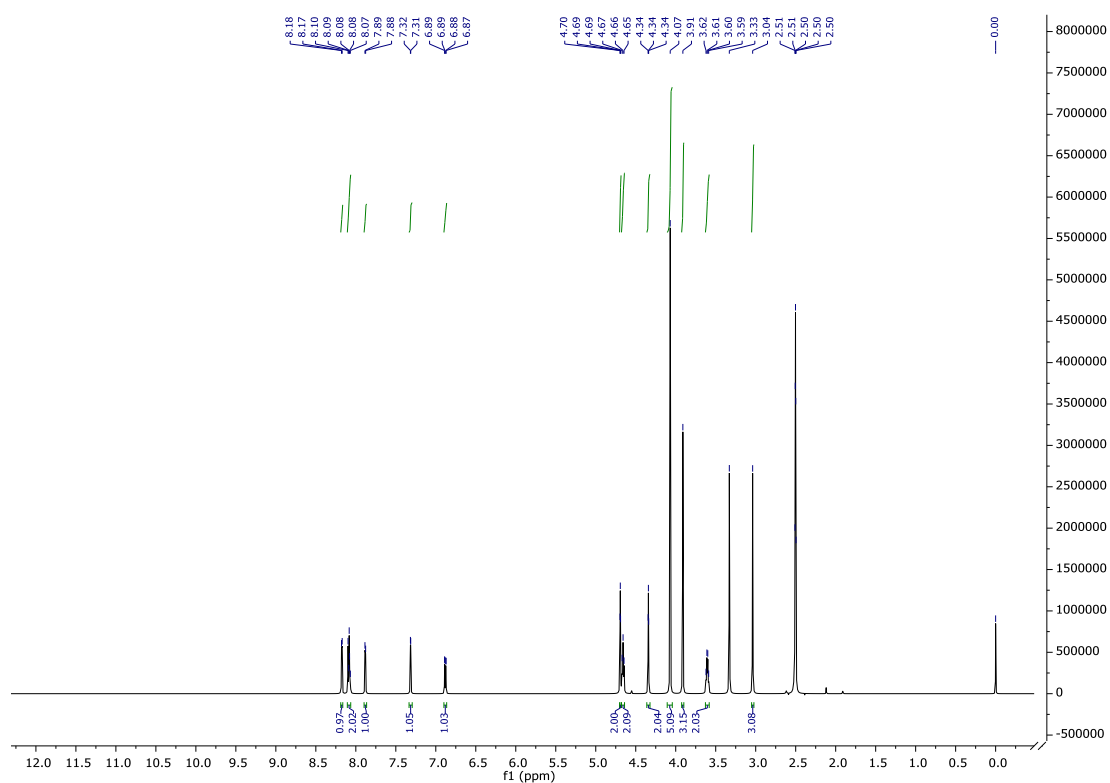

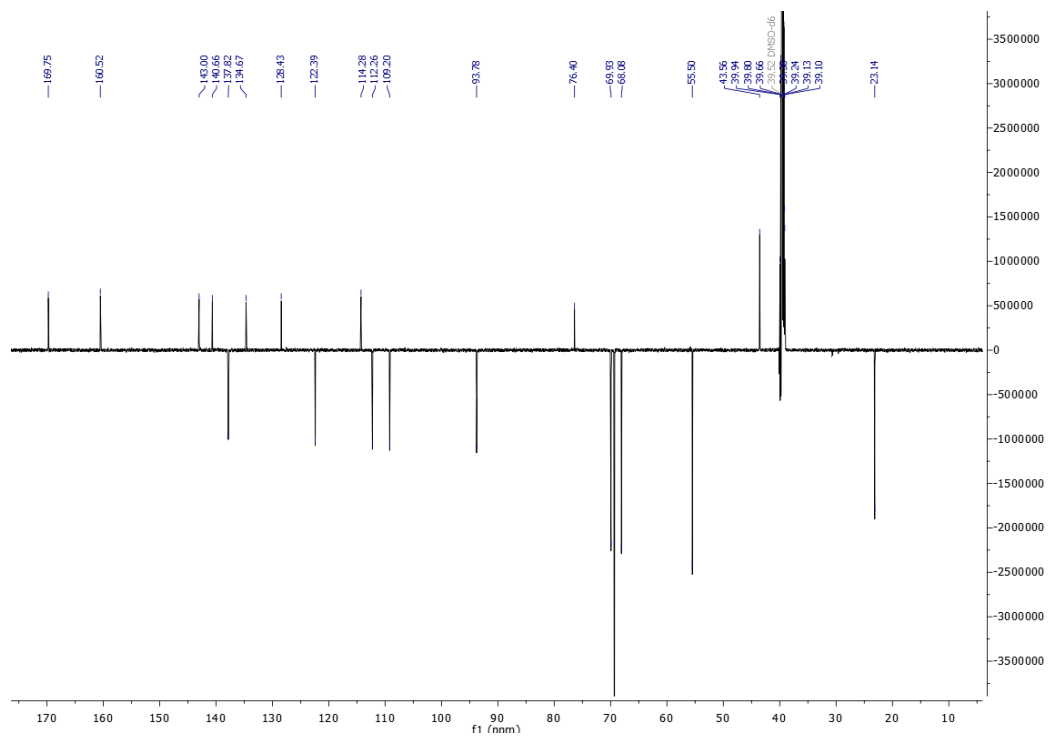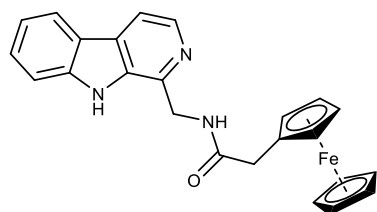

34

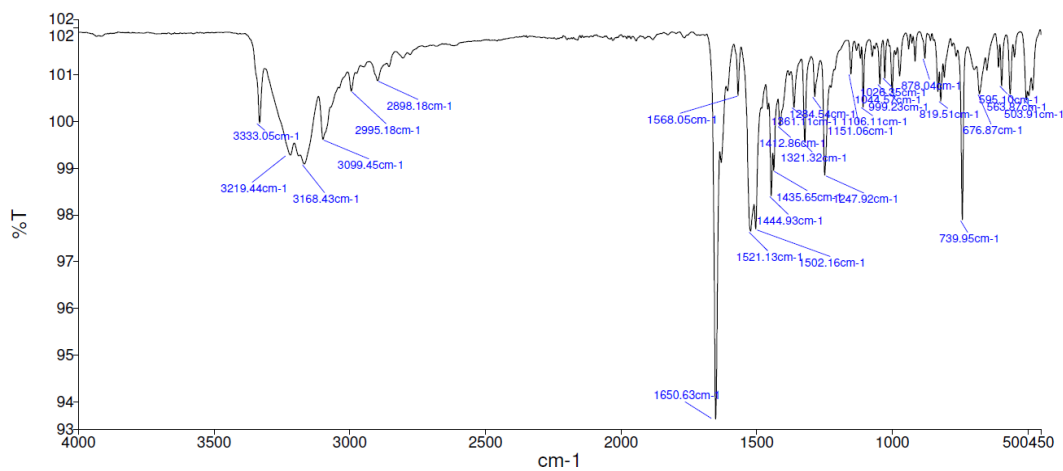

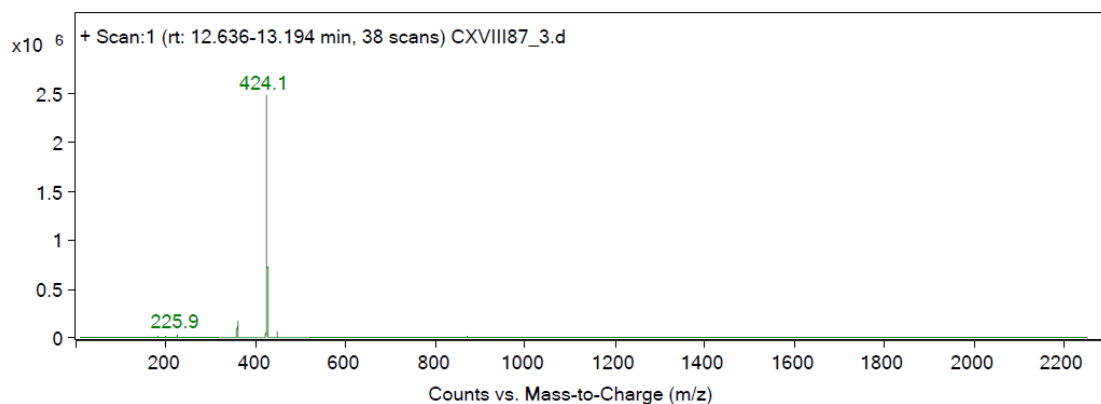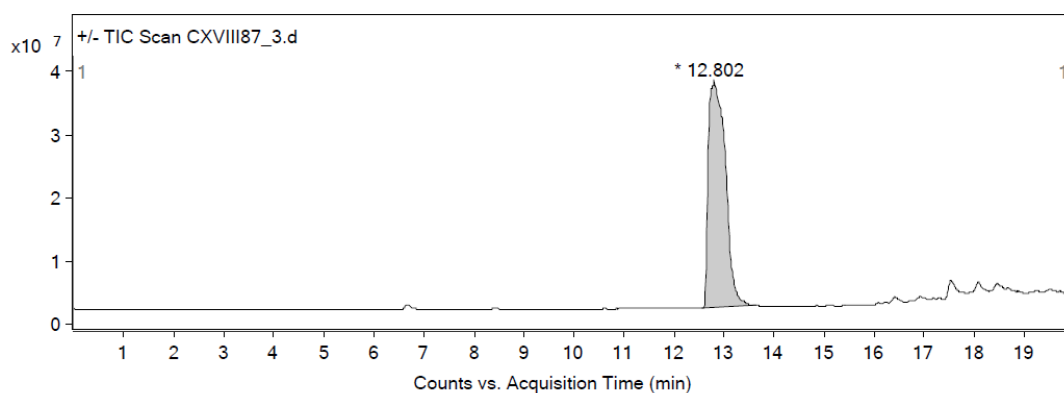

#### Integration Peak List

| Peak | Start  | RT     | End    | Height      | Area         | Area % |
|------|--------|--------|--------|-------------|--------------|--------|
| 1    | 12.546 | 12.802 | 13.631 | 36091192.23 | 844377614.54 | 100    |

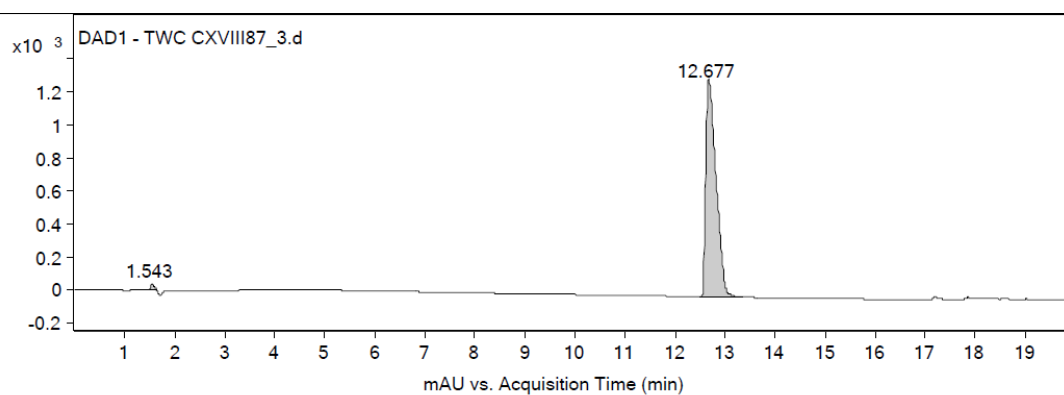

#### Integration Peak List

| Peak | Start  | RT     | End    | Height  | Area     | Area % |
|------|--------|--------|--------|---------|----------|--------|
| 1    | 1.45   | 1.543  | 1.639  | 38.73   | 190.72   | 1.01   |
| 2    | 12.517 | 12.677 | 13.358 | 1319.93 | 18842.47 | 100    |

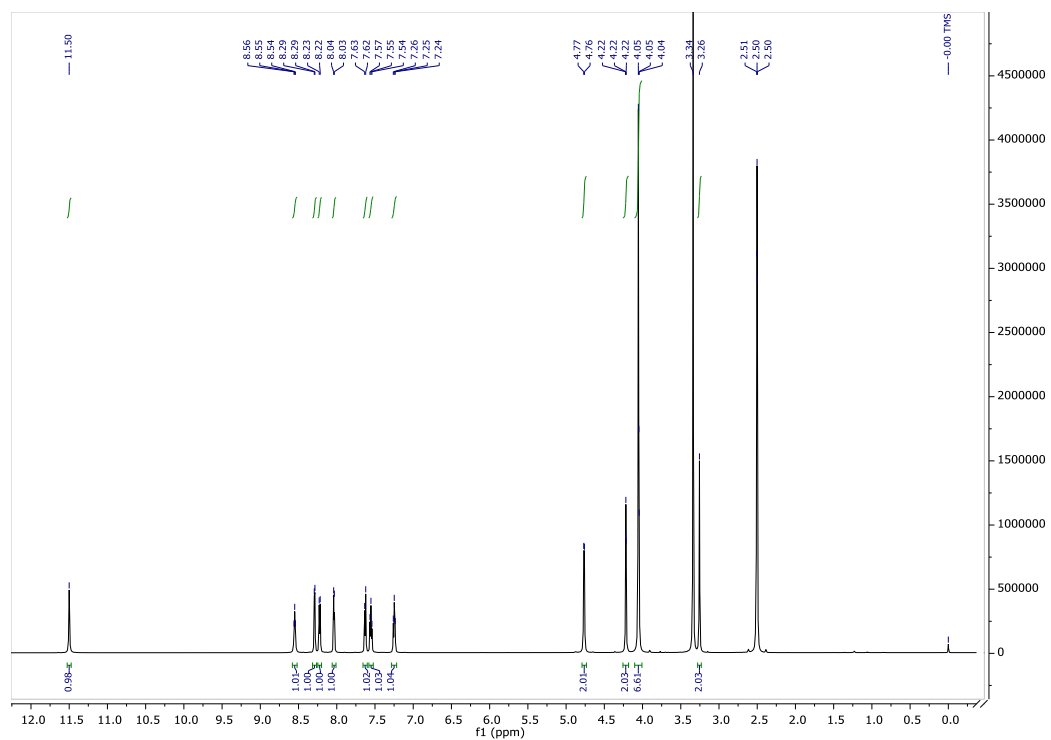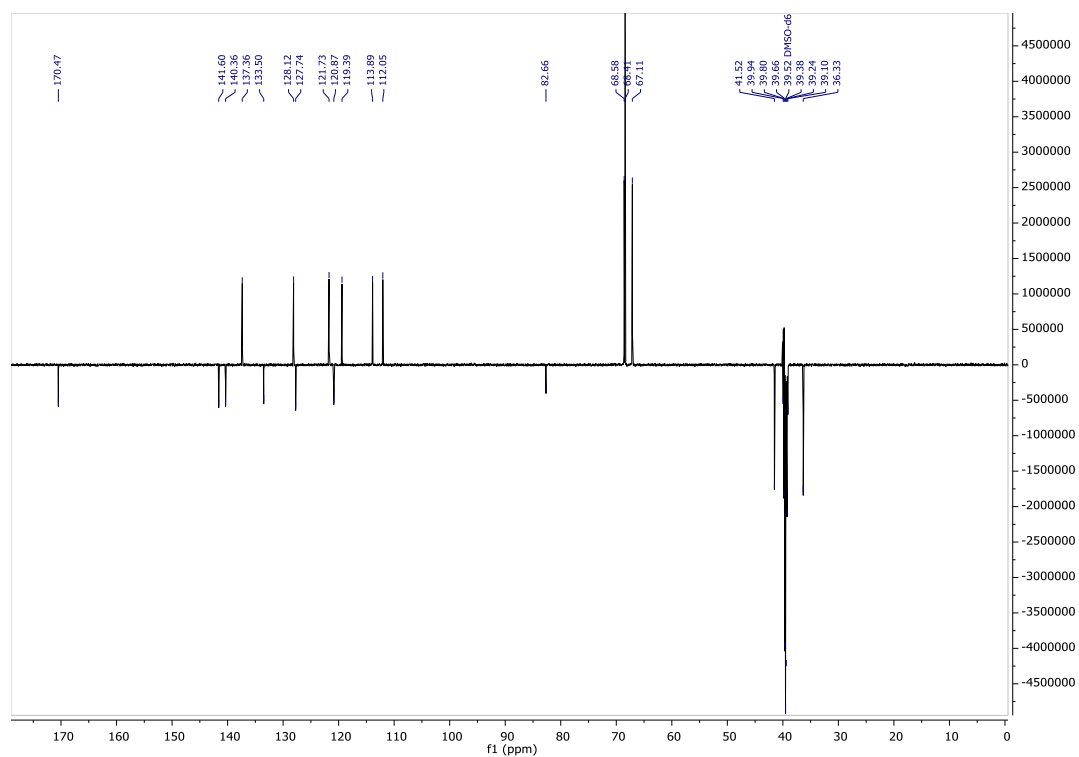

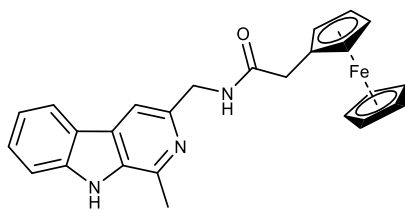

35

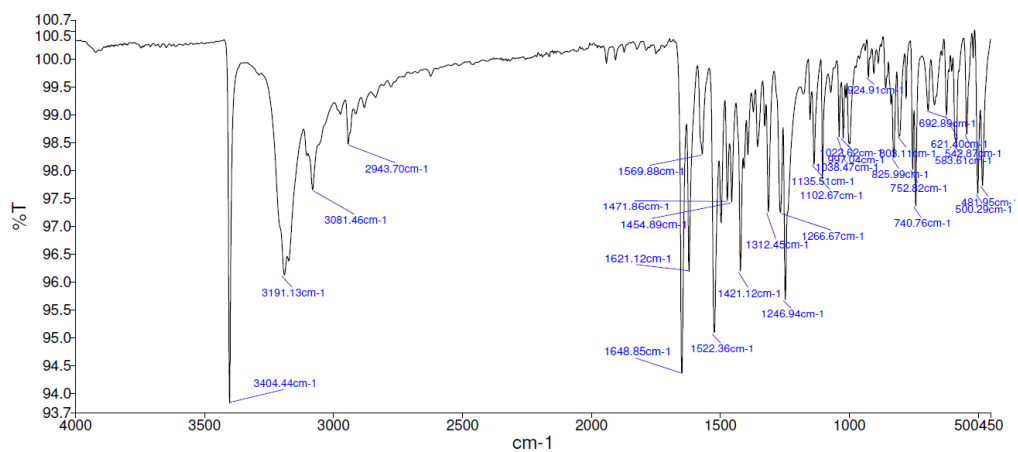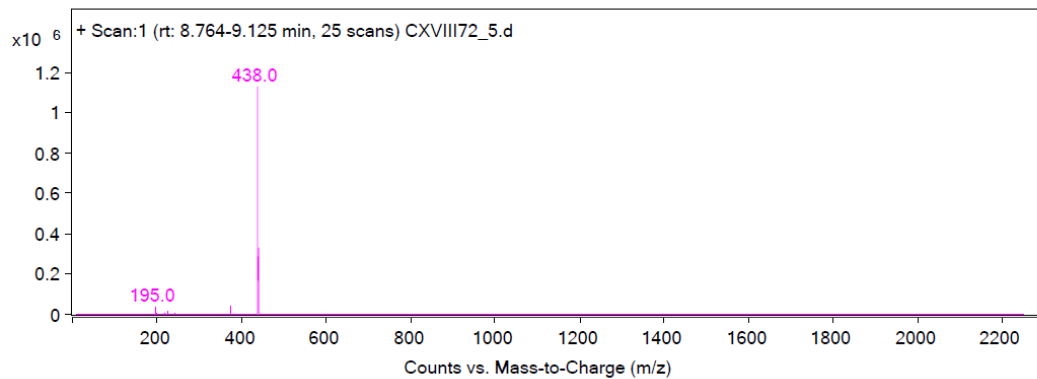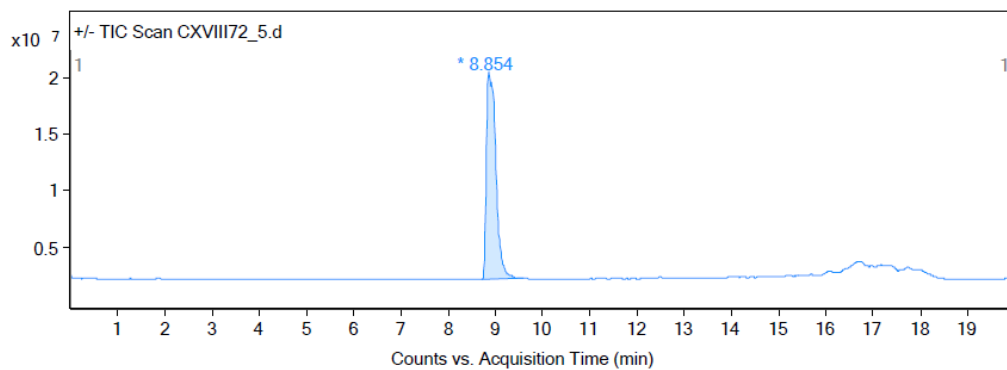

Integration Peak List

| Peak | Start | RT    | End   | Height      | Area         | Area % |
|------|-------|-------|-------|-------------|--------------|--------|
| 1    | 8.703 | 8.854 | 9.577 | 18358298.28 | 248380233.19 | 100    |

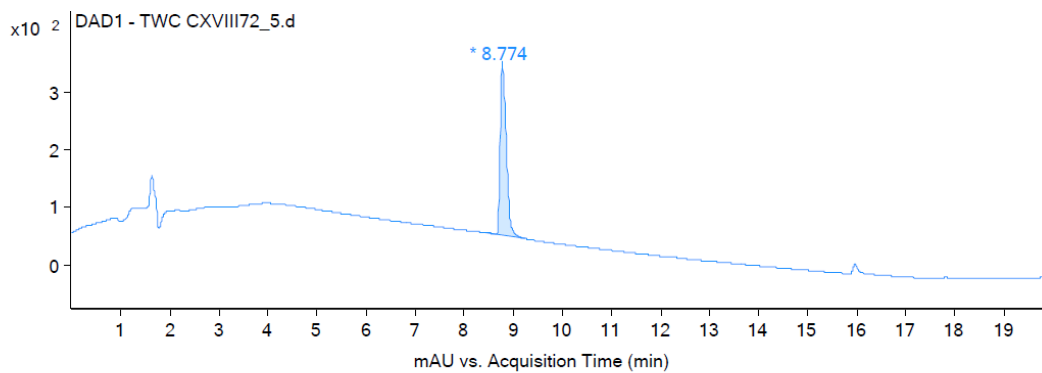

# Integration Peak List

| Peak | Start | RT    | End   | Height | Area | Area % |
|------|-------|-------|-------|--------|------|--------|
| 1    | 8.42  | 8.774 | 9.234 | 301.5  | 2556 | 100    |

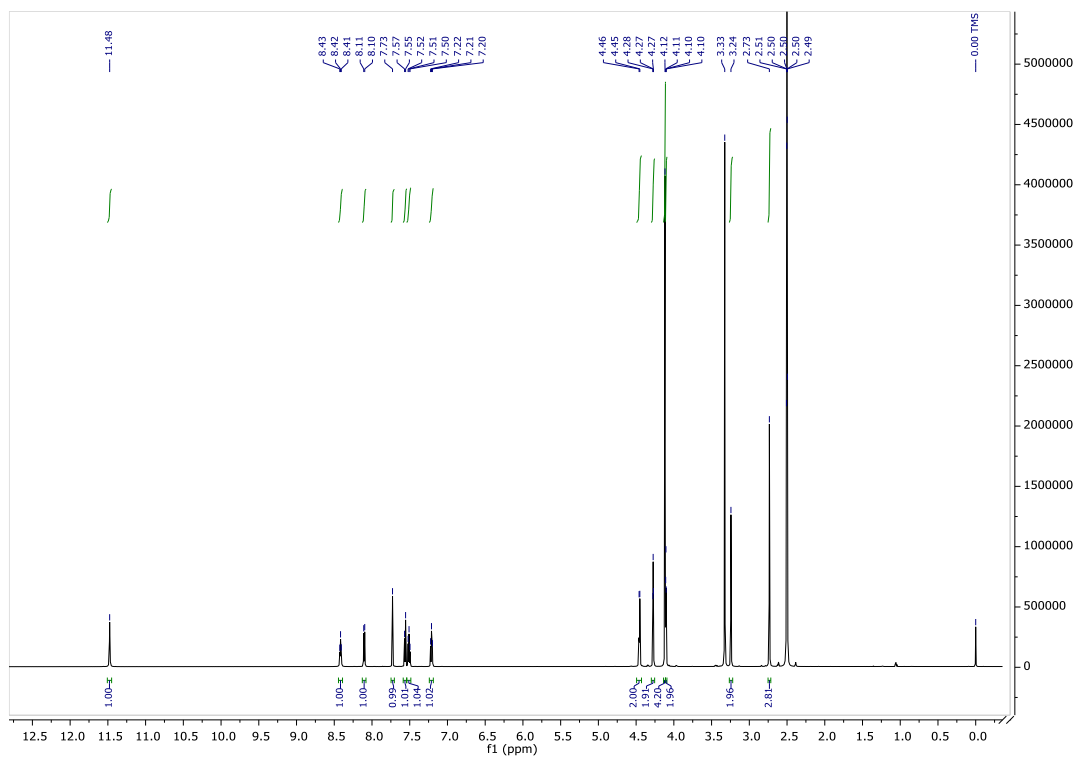

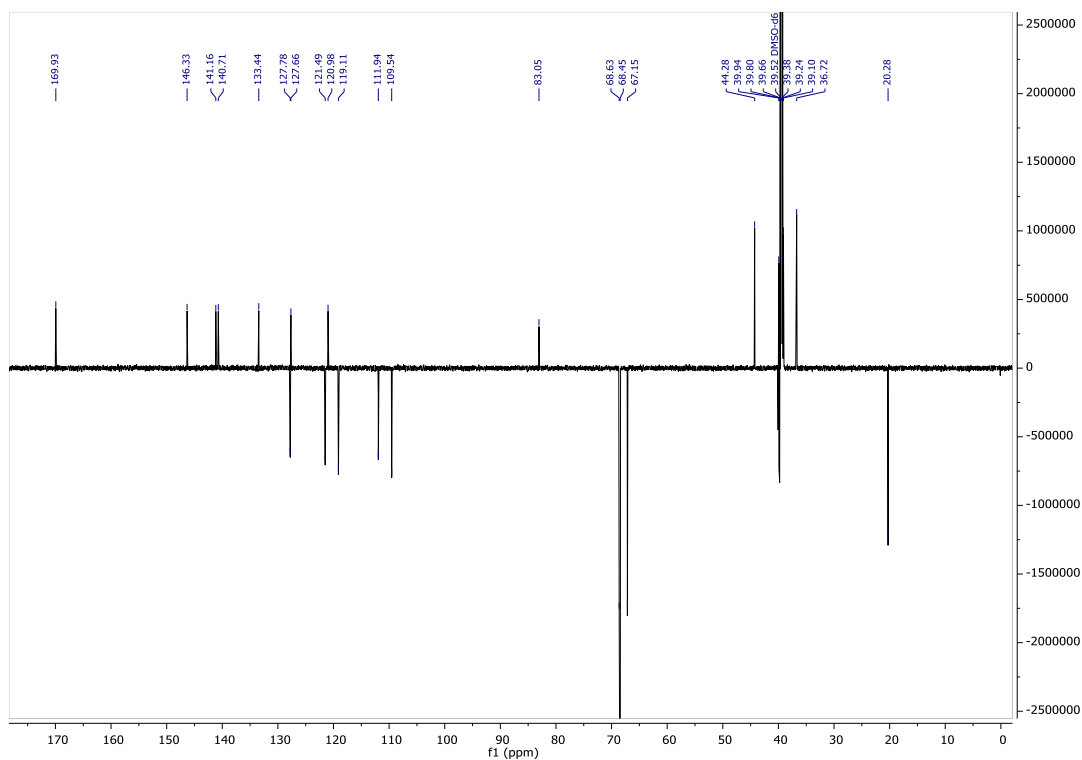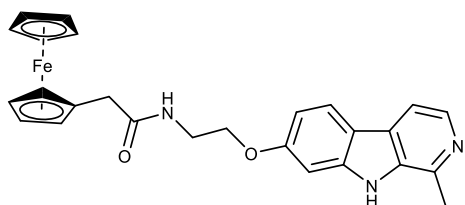

**36**

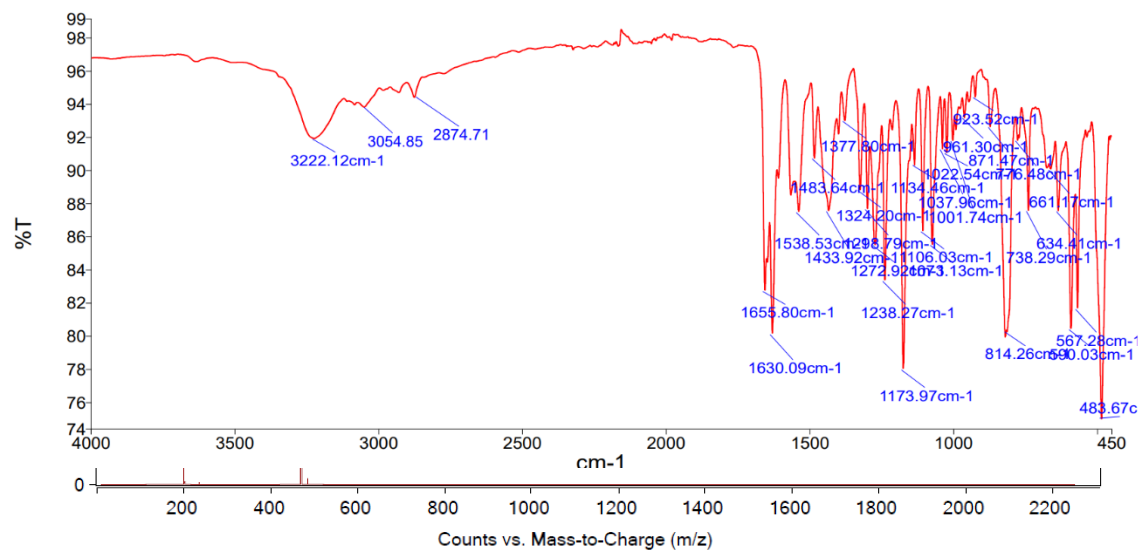

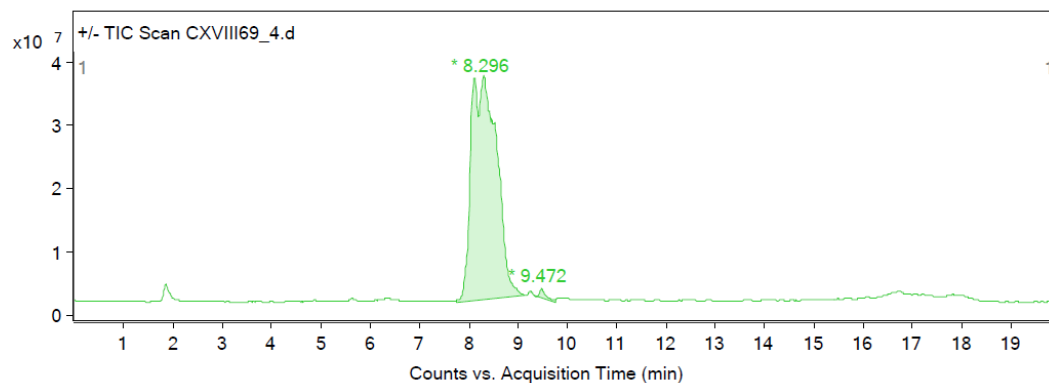

**Integration Peak List**

| Peak | Start | RT    | End   | Height      | Area          | Area % |
|------|-------|-------|-------|-------------|---------------|--------|
| 1    | 7.739 | 8.296 | 9.125 | 35456743.85 | 1278789928.72 | 100    |
| 2    | 9.336 | 9.472 | 9.773 | 1420821.54  | 13300609.58   | 1.04   |

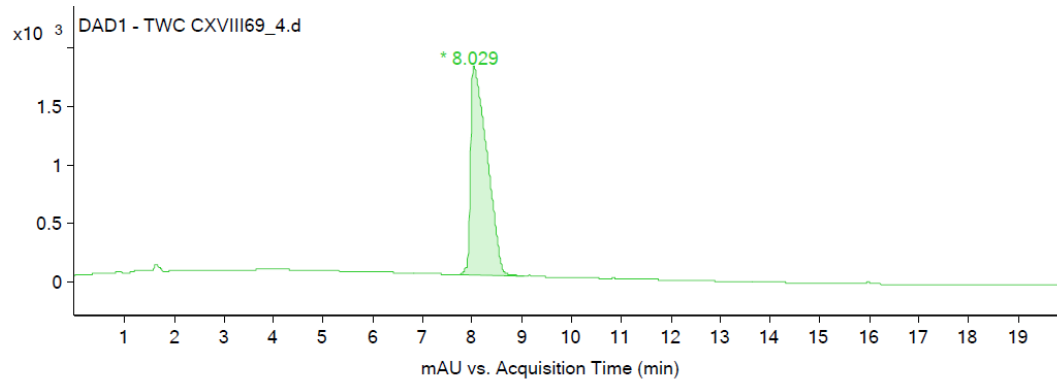

**Integration Peak List**

| Peak | Start | RT    | End   | Height  | Area    | Area % |
|------|-------|-------|-------|---------|---------|--------|
| 1    | 7.722 | 8.029 | 9.029 | 1782.73 | 41115.7 | 100    |



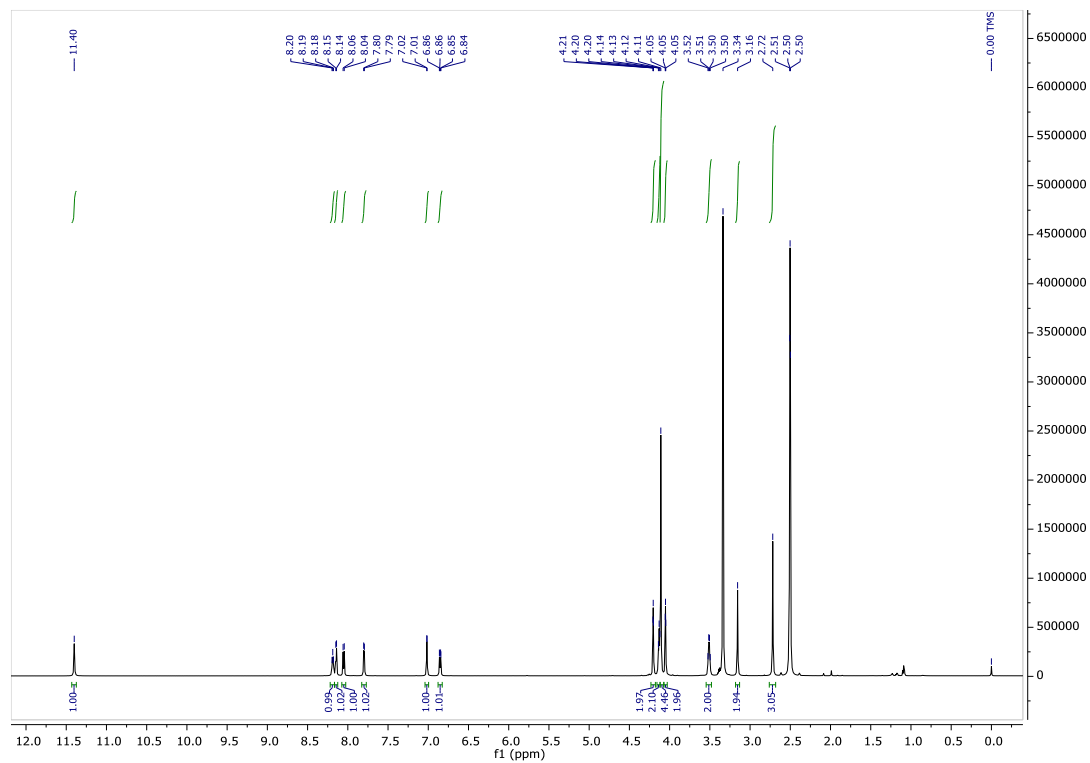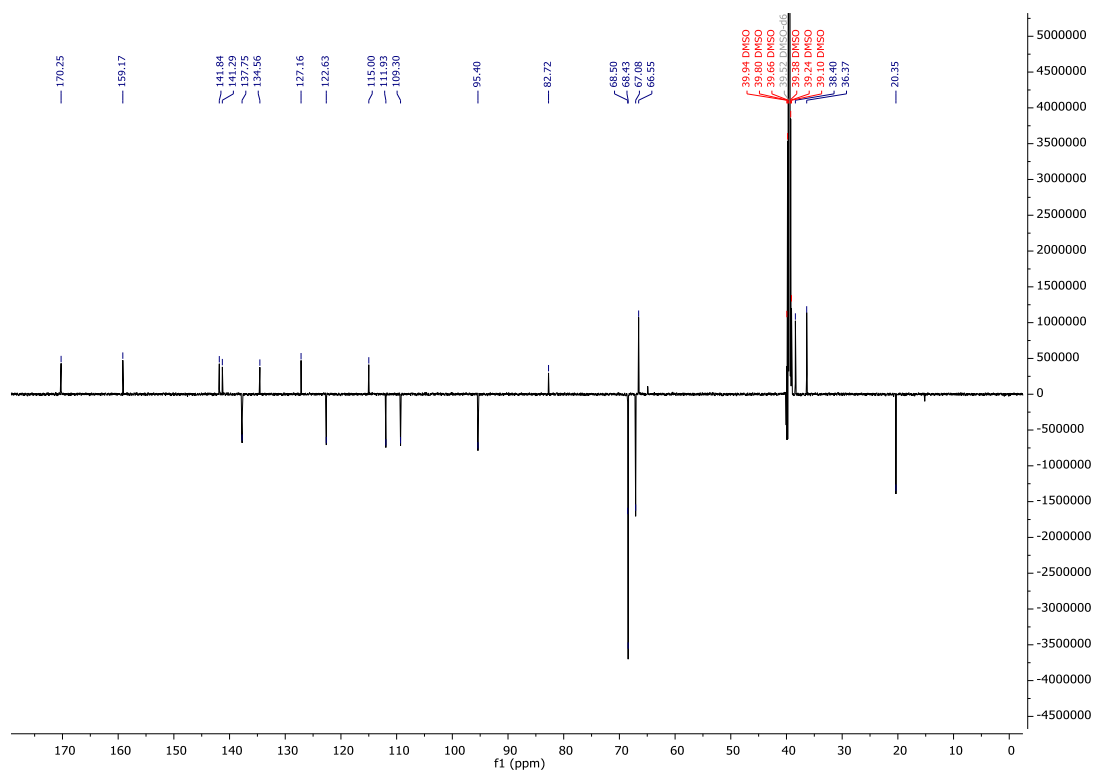

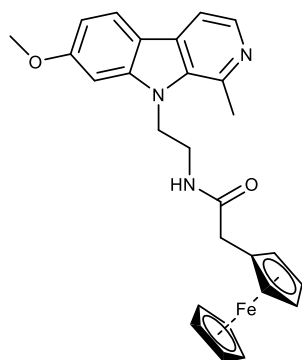

**37**

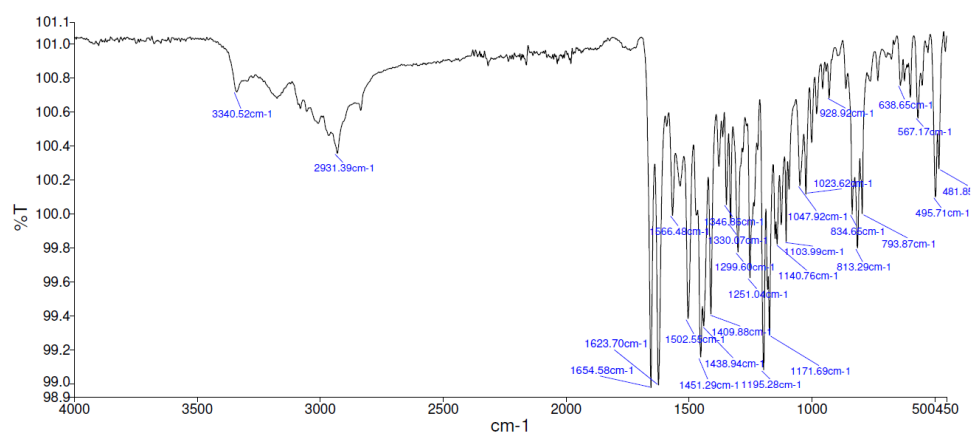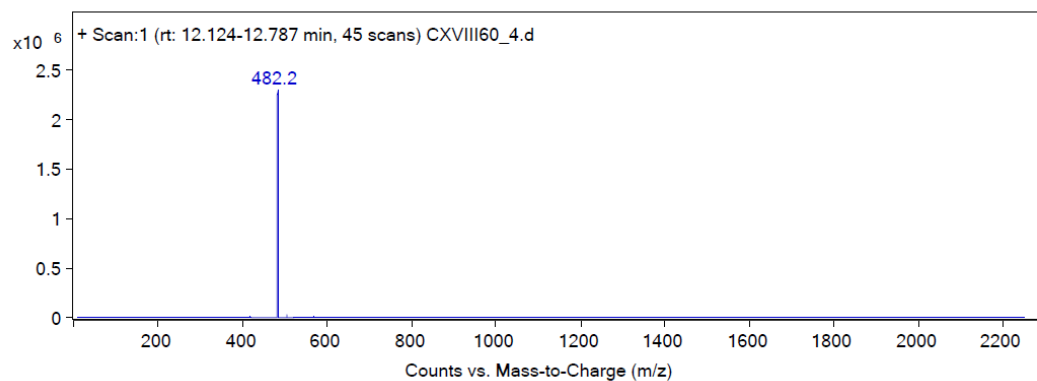

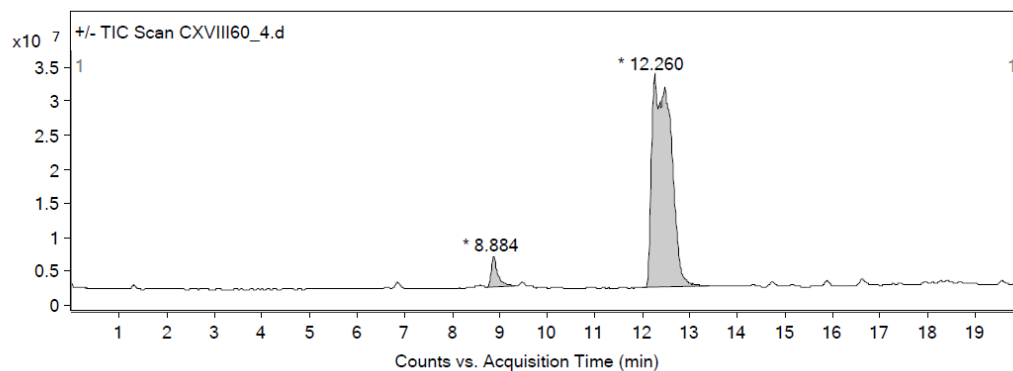

**Integration Peak List**

| Peak | Start  | RT    | End   | Height      | Area         | Area % |
|------|--------|-------|-------|-------------|--------------|--------|
| 1    | 8.718  | 8.884 | 9.336 | 4479840.71  | 44307179.08  | 5.08   |
| 2    | 12.019 | 12.26 | 13.39 | 31597336.17 | 871523549.01 | 100    |

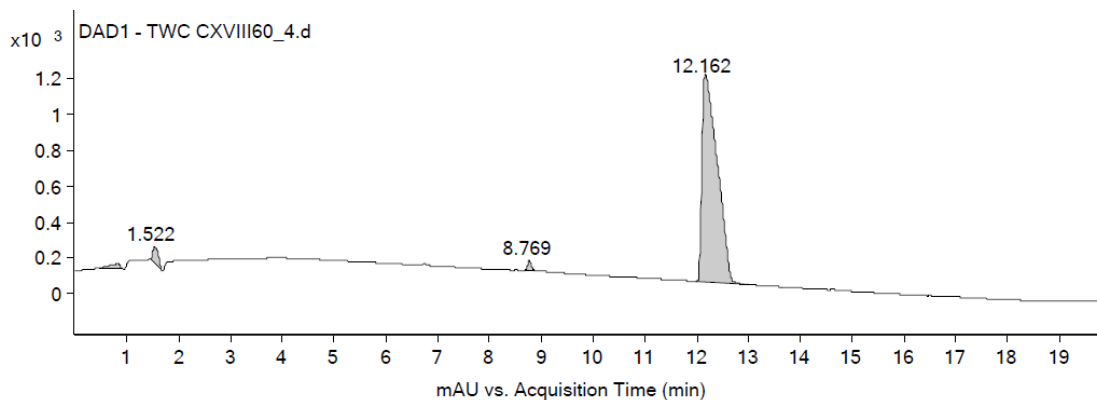

**Integration Peak List**

| Peak | Start  | RT     | End    | Height  | Area     | Area % |
|------|--------|--------|--------|---------|----------|--------|
| 1    | 0.475  | 0.822  | 0.909  | 24.56   | 351.74   | 1.49   |
| 2    | 1.455  | 1.522  | 1.662  | 87.27   | 731.86   | 3.1    |
| 3    | 8.694  | 8.769  | 8.875  | 58.9    | 287.3    | 1.22   |
| 4    | 11.975 | 12.162 | 13.029 | 1153.28 | 23574.59 | 100    |

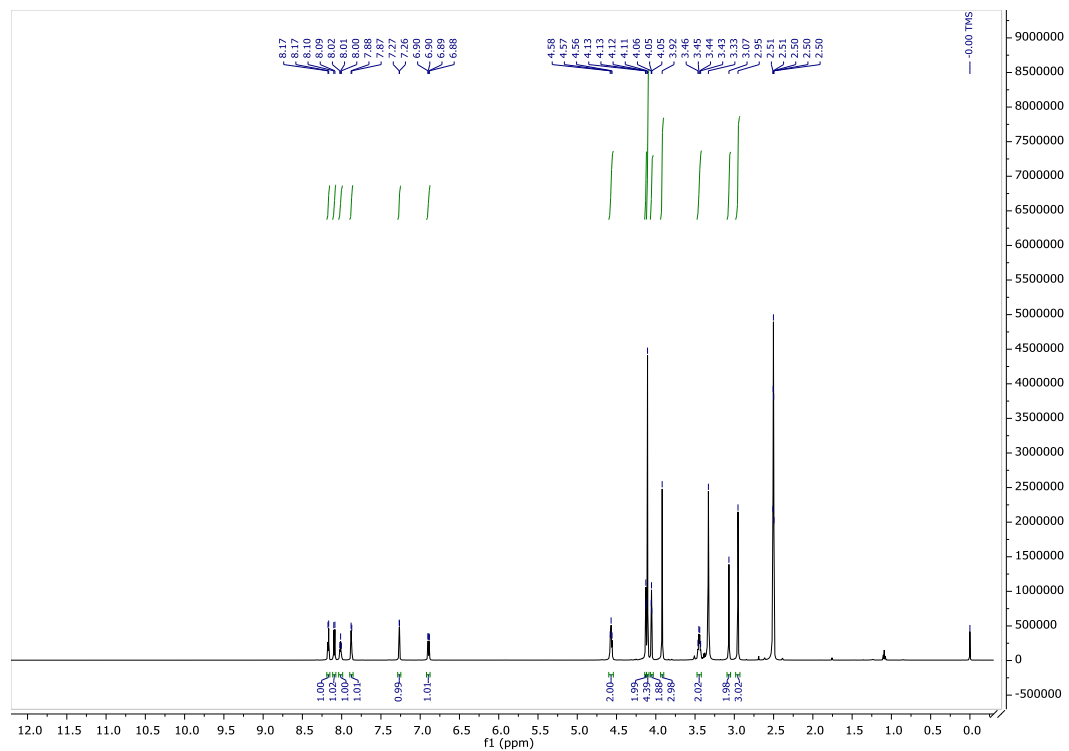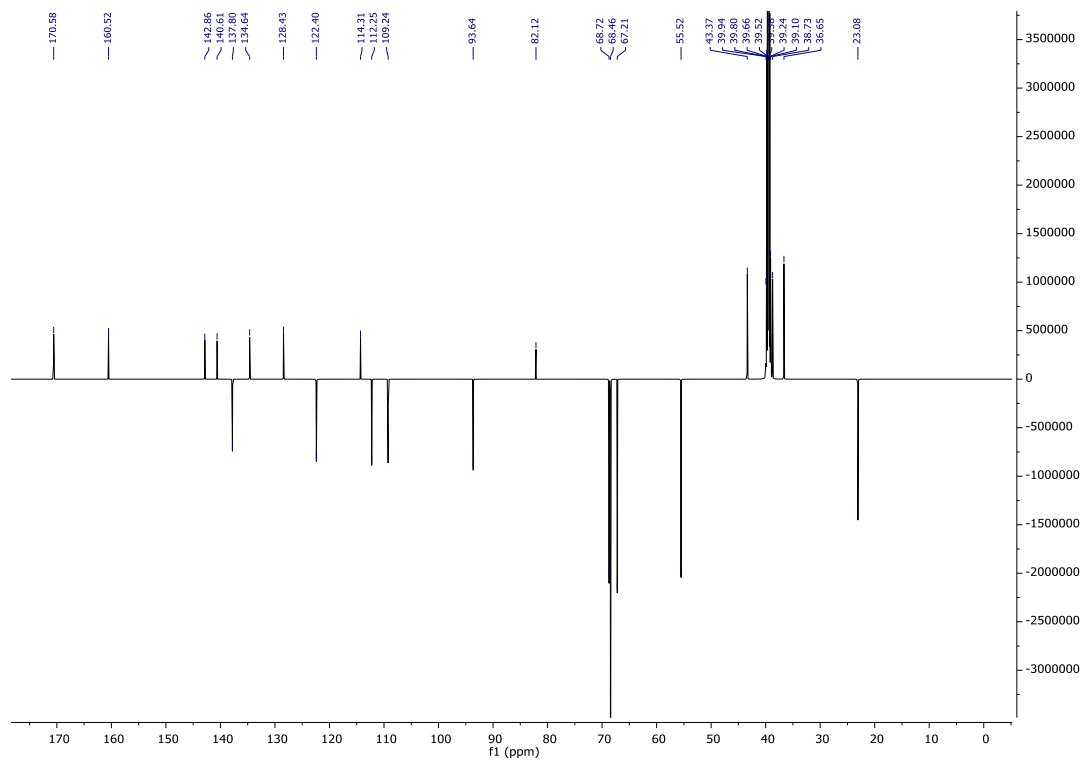

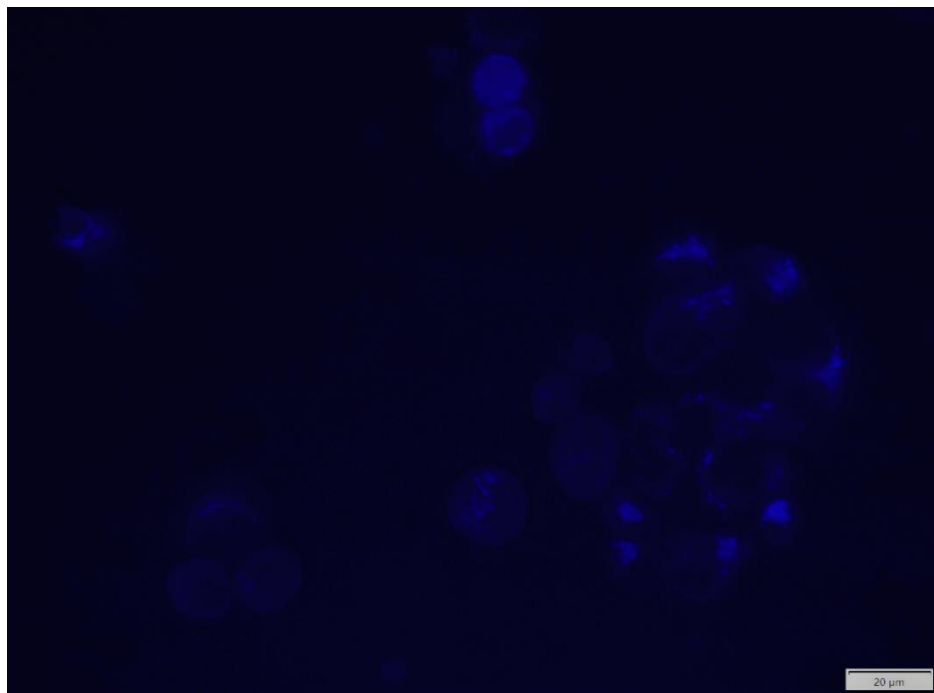

**Figure S1.** Fluorescent microscopy image (400 × magnification) of MCF-7 cells incubated with 5 μM concentration of compound **23** for 30 min. The scale bar is 20 μm.
